# Supplementary material for: Lola regulates Drosophila adult midgut homeostasis via non-canonical hippo signaling
Source: eLife. 2020 Jan 14;9:e47542. doi: 10.7554/eLife.47542 (PMC7299341; doi:10.7554/eLife.47542)
Supplement: Figure 1—source data 1. [file elife-47542-fig1-data1.xlsx]

## Sheet: Figure 1E
	quantification of p-H3+ cell numbers per gut
	control	wts RNAi	yki RNAi	yki RNAi;wts RNAi
	4	18	2	18
	2	11	2	17
	4	20	4	15
	2	20	4	18
	5	10	2	17
	3	9	4	21
	3	17	2	20
	5	17	8	24
	3	11	3	25
	2	19	2	17
	5	7	2	20
	1	13	1	21
	4	22	2	23
	3	26	4	25
	3	24	5	18
	3	15	2	19
	3	22	4
	5	26	3
	5	22	4
	3	20	3
		20	4
			2

## Sheet: Figure 1I
	quantification of Dl+ cell numbers per clone
	control	wtsx1	yki RNAi; wtsx1
	2	2	4
	2	5	7
	0	1	4
	1	5	5
	1	3	6
	1	1	4
	0	6	0
	0	3	6
	1	5	5
	0	1	1
	1	4	3
	1	2	3
	2	5	3
	1	2	1
	0	4	0
	0	3	2
	0	2	2
	3	2	2
	1	14	1
	3	6	4
	1	4	4
	1	0	6
	0	6	4
	0	6	3
	0	2	3
	0	3	3
	0	0	5
	0	2	2
	2	4	3
	0	8	8
	2	2	5
	0	5	8
	1	2	4
	1	6	0
	2	1	2
	0	16	1
	0	1	5
	1	1	0
	3	1	6
	1	4	11
	1	0	2
	0	0	5
	1	3	13
	3	4	5
	0	3	4
	0	4	1
	0	2	8
	0	9	3
	1	2	4
	2	4	14
	0	1	0
	0	3	1
	1	5	0
	0	1	7
	1	1	9
	2	0	4
	3	3	5
	1	2	3
	2	0	6
	1	5	2
	2	9	3
	0	2	6
	0	0	4
	1	0	2
	1	3	0
	0	12	3
	1	15	8
	0	6	5
	0	1	10
	2	2	2
	1	3	4
	1	2	9
	0	2	1
	1	1	0
	0	5	5
	4	7	9
	2	6	3
	3	5	4
	1	6	5
	3	2	2
	1	4	9
	1	14	17
	3	2	5
	0	10	8
	0	5	8
	2	9	9
	4	6	12
	11	5	3
	2	6	4
	1	21	2
	0	13	11
	1	5	1
	3	5	1
	1	6	9
	1	3	7
	3	5	6
	2	8	12
	0	8	4
	1	10	5
	1	2	2
	2	3	3
	2	4	2
	1	7	9
	1	10	5
	1	5	3
	1	2	4
	2	6	14
	4	3	2
	1	3	0
	0	1	11
	1	0	8
	1	4	3
	3	8	5
	0	11	2
	2	17	4
	0	1	1
	0	1	6
	1	4	1
	2	3	11
	0	5	17
	0	2	5
	0	2	6
	1	6	2
	1	9	14
	0		7
	2		12
	1
	0
	1
	1
	0
	1
	4
	6
	1
	5
	2
	1
	2
	2
	2
	1
	0
	0
	3
	0
	2
	0
	1
	2
	3
	1

## Sheet: Figure 1N
	quantification of clone sizes
	control	ykiB5	wts RNAi	ykiB5;wts RNAi
	1	2	2	4
	1	1	3	3
	4	1	2	2
	1	3	2	2
	1	2	2	8
	1	2	4	4
	2	1	6	2
	1	1	3	3
	3	1	4	2
	2	2	3	2
	2	1	12	3
	1	2	4	1
	1	2	3	3
	1	3	3	6
	4	1	2	4
	1	1	2	3
	1	2	2	2
	3	3	6	8
	1	2	3	4
	1	2	4	1
	1	1	3	2
	1	1	4	3
	2	3	2	3
	1	2	4	2
	1	2	4	3
	1	1	2	3
	1	1	3	6
	2	1	2	7
	2	2	2	4
	2	1	2	3
	1	2	3	2
	1	2	2	8
	1	3	3	4
	3	1	2	2
	1	1	3	3
	1	2	4	4
	2	3	4	5
	2	2	3	2
	1	2	4	3
	1	1	4	3
	2	1	3	6
	3	3	10	4
	1	2	6	3
	4	2	3	5
	2	1	4	2
	2	1	3	8
	1	1	2	2
	1	2	3	2
	1	1	4	3
	1	2	4	5
	1	2	2	2
	3	3	10	2
	4	1	2	1
	5	1	10	9
	1	2	2	5
	2	3	3	2
	2	2	3	2
	3	2	2	1
	1	1	3	3
	1	1	2	4
	1	3	2	5
	3	2	4	5
	1	2	4	2
	1	1	4	4
	3	1	3	6
	5	1	2	7
	1	2	2	2
	2	1	4	5
	2	2	3	2
	1	2	10	2
	1	3	3	2
	2	1	2	2
	2	1	3	5
	3	2	12	4
	1	3	4	3
	4	2	3	2
	1	2	4	1
	1	1	4	4
	1	1	4	6
	3	3	4	2
	5	2	6	9
	3	2	3	5
	1	1	10	2
	2	1	4	2
	2	1	2	1
	1	2	3	3
	1	1	4	5
	5	2	3	3
	1	2	2	5
	1	3	3	2
	2	1	2	4
	1	1	2	6
	1	2	4	7
	1	3	2	2
	1	2	2	9
	3	2	4	4
	1	1	2	2
	1	1	3	2
	1	3	4	2
	1	2	3	5
	1	2	3	4
	2	1	2	3
	2	1	4	5
	1	1	4	2
	1	2	2	2
	1	1	4	5
	2	2	3	3
	1	2	4	4
	2	3	2	9
	1	1	2	2
	1	1	3	5
	1	2	3	5
	1	3	2	4
	1	2	2	2
	2	2	3	2
	1	1	12	2
	1	1	2	1
	3	3	2	4
	1	2	3	2
	1	2	12	1
	2	1	4	3
	2	1	3	3
	1		2	3
	3		2	6
	1		4	4
	1		3	4
	1		6	6
	1		3	7
	2		2	4
	2		2	3
	5		3	2
	3		4	2
	1		3	9
	1		4	5
	1		2	2
			2	8
			3	4
			12	2
			3	2
			4	2
			4	1
			4	2
			3	3
			3	2
			4	3
				5
				4
				5
				2
				3
				3
				5
				2
				1
				3
				6
				4
				4
				6
				7
				4
				3
				2
				2
				9
				5
				2
				8
				4
				2
				2
				2
				1
				2
				3
				2

## Sheet: Figure 1-figure supplement 1F
	quantification of p-H3+ cell numbers per gut
	control	wts RNAi-2	yki RNAi	yki RNAi; wts RNAi-2
	3	18	7	20
	5	16	2	18
	3	3	5	6
	1	15	5	8
	3	7	7	8
	3	9	1	13
	1	7	3	7
	0	11	0	9
	6	19	4	6
	0	8	4	12
	5	6	1	17
	3	12	0	10
	2	15	4
	3		2

## Sheet: Figure 1-figure supplement 1K
	quantification of wing sizes
	control	wts RNAi	yki RNAi	yki RNAi; wts RNAi
	0.868932	1.25957	0.910339	0.954704
	0.894372	1.24414	0.842568	0.917311
	1.02324	1.18	0.747604	0.936022
	1.00425	1.23954	0.661975	0.838914
	1.04899	1.25803	0.712519	0.920909
	0.982968	1.27404	0.924093	0.853766
	1.0656	1.24361	0.819956	0.858619
	1.03154	1.30291	0.861704	0.886212
	0.914929	1.32593	0.762994	0.900823
	0.985692	1.23784	0.598835	0.91317
	1.00674	1.28531		0.907864
	1.0039	1.30443
	1.02635	1.28752
	1.06162	1.32263
	1.05693	1.27318
	1.02397	1.22579
		1.2572
		1.23037
		1.27515
		1.24645
		1.30439
		1.28904

## Sheet: Figure 1-figure supplement 1P
	quantification of clone sizes
	control	sdB1	wts RNAi	sdB1;;wts RNAi
	2	1	52	13
	4	1	7	6
	7	3	13	9
	3	1	20	33
	2	2	12	17
	2	1	19	10
	3	3	32	28
	4	5	8	11
	2	3	9	16
	5	11	34	16
	3	2	53	15
	1	2	12	19
	2	1	37	4
	2	3	56	7
	3	1	7	6
	3	2	6	9
	4	1	52	15
	11	3	8	38
	3	2	8	11
	1	1	7	3
	2	4	7	4
	3	3	7	8
	1	1	7	23
	3	2	8	15
	4	3	9	23
	9	1	9	9
	3	2	16	33
	2	1	24	15
	1	3	12	15
	4	5	19	8
	1	3	6	15
	2	5	6	7
	2	2	28	6
	13	1	17	5
	3	1	52	6
	5	3	8	16
	3	1	7	9
	1	2	7	16
	1	1	7	16
	1	3	51	38
	4	5	21	33
	5	2	16	7
	3	1	24	33
	1	4	6	7
	4	3	15	9
	1	1	7	4
	5	2	13	27
	1	1	15	11
	2	2	52	16
	7	1	19	6
	4	3	51	9
	1	5	21	29
	5	3	34	9
	2	2	12	13
	3	2	56	16
	1	1	11	14
	4	1	14	4
	5	3	12	27
	2	1	8	26
	1	2	8	13
	4	1	8	8
	1	3	15	9
	1	5	7	11
	2	2	14	13
	1	1	14	9
	1	4	9	8
	4	3	11	11
	1	1	17	12
	1	2	19	25
	2	1	11	23
	2	2	14	22
	1	1	20	26
	3	3	33	22
	1	5	12	29
	2	3	32	29
	2	6	14	6
	4	2	53	7
	3	1	12	11
	1	1	37	17
	3	3	7	1
	3	1	8	8
	1	2	8	15
	4	1	14	4
	3	3	11	27
	3	2	9	22
	1	1	28	9
	1	4	9	9
	1	3	15	7
	2	1	33	16
	2	2	12	9
	4	3		7
	1	1		16
	4	2		13
	1	1		9
	2	3		18
	2	5		38
	2	3		9
	4	11		8
	2	2		11
	2			7
	1			4
	4			25
	3			38
	1			7
	2			19
	1			28
	2			17
	1			7
	3			11
	1			5
