# Supplementary material for: Lola regulates Drosophila adult midgut homeostasis via non-canonical hippo signaling
Source: eLife. 2020 Jan 14;9:e47542. doi: 10.7554/eLife.47542 (PMC7299341; doi:10.7554/eLife.47542)
Supplement: Figure 2—source data 1. [file elife-47542-fig2-data1.xlsx]

## Sheet: Figure 2C
	quantification of p-H3+ cell numbers per gut
	control	lola RNAi
	4	14
	5	20
	4	15
	0	13
	0	16
	2	18
	3	21
	1	12
	1	17
		19

## Sheet: Figure 2H
	quantification of p-H3+ cell numbers per gut
	control	lola RNAi
	20	135
	8	72
	10	88
	5	109
	12	111
	7	140
	15	95
	13	78
	9	92
	10	60

## Sheet: Figure 2-figure supplement 1D
	quantification of p-H3+ cell numbers per gut
	control	lola RNAi
	10	15
	0	38
	1	17
	7	20
	2	12

## Sheet: Figure 2-figure supplement 1G
	quantification of p-H3+ cell numbers per gut
	control	lola RNAi
	15	66
	2	91
	11	80
	8	50
	5	98
