# Supplementary material for: Lola regulates Drosophila adult midgut homeostasis via non-canonical hippo signaling
Source: eLife. 2020 Jan 14;9:e47542. doi: 10.7554/eLife.47542 (PMC7299341; doi:10.7554/eLife.47542)
Supplement: Figure 4—source data 1. [file elife-47542-fig4-data1.xlsx]

## Sheet: Figure 4D
	quantification of p-H3+ cell numbers per gut
	control	lola RNAi	yki RNAi	yki RNAi; lola RNAi	sd RNAi	sd RNAi; lola RNAi
	3	28	5	20	2	15
	0	15	10	18	3	17
	1	5	2	10	10	20
	8	11	1	25	5	12
	5	8	3	11	3	20
	2	30	0	15	2	27
	7	20	4	23	6	11
	3	22	4	19	1	32
	6	9	3	7	0	22
		13	8	27	4
				35	7
