# Supplementary material for: Lola regulates Drosophila adult midgut homeostasis via non-canonical hippo signaling
Source: eLife. 2020 Jan 14;9:e47542. doi: 10.7554/eLife.47542 (PMC7299341; doi:10.7554/eLife.47542)
Supplement: Figure 5—source data 1. [file elife-47542-fig5-data1.xlsx]

## Sheet: Figure 5F
	quantification of Dref/GFP signal intensity
	intensity of Dref signal		intensity of GFP signal
	control	lola5D2	control	lola5D2
	30.7	36.86	22.94	21.04
	44.83	111.34	20.72	55.74
	49.94	51.67	15.7	51.69
	30.7	55.65	20.96	30.6
	27.39	76.55	18.66	80.8
	31.97	72.47	14.14	36.59
	90.32	68.19	101.43	63.74
	18.88	87.23	22.64	31.58
	32.62	67.36	19.77	39.57
	20.19	43.55	18.36	54.67
	16.21	36.08	10.64	49.72
	29.03	69.82	15.3	61.3
	20	84.22	21.42	53.97
	40.95	43.98	19.04	72.52
	64.03	51.55	16.75	41.51
	27.94	54.45	23.88	59.73
	36.04	87.42	14.48	36.71
	68.37	53.23	59.89	46.08
	35.26	39.81	17.23	157.73
	18.53	50.08	14.34	43.12
	31.93	40.72	19.28	21.37
	28.1	52.65	19.29	30.45
	35.29	87.46	22.18	86.6
	43.05	57.93	19.11	121.42
	49.47	54.1	15.74	55.25
	34.36	43.84	21.11	24.67
	44.67	51.29	23	50.45
	31.38	42.01	19.7	81.13
	100.6	36.31	19.84	32.03
	26.24	54.17	17.7	46.3
	24.89	35.83	18.72	37.25
	38.29	48.83	25.31	43.45
	36.66	50.15	22.65	26.07
	36.02	62.06	26.54	50.06
	27.73	97.42	20.81	61.19
	34.83	49.91	16.6	47.92
	34.84	28.24	19.92	30.7
	74.35	29.14	21.15	22.17
	45.52	30.29	23.68	56.73
	60.4	70.18	22.84	42.15
	29.69	80.66	20.97	24.78
	43.18	35.84	24.27	57.17
	46.55	56.74	22.28	47.73
	26.12	78.13	21.64	24.96
	28.67	47.36	20.53	42.43
	23.58	98.41	20.34	42.28
	38.93	32.8	18.58	35.26
	28.99	45.78	13.03	35.21
	54.79	39.26	23.28	21.81
	31.3	19.88	16.68	20.12

## Sheet: Figure 5G
	quantification of p-H3+ cell numbers per gut
	control	lola RNAi	Dref RNAi	lola RNA; Dref RNAi	SkpA RNAi	lola RNAi; SkpA RNAi
	1	14	5	3	0	1
	3	20	4	2	0	0
	5	15	0	2	0	1
	1	13	1	3	0	0
	2	22	1	9	1	0
	1	18	3	5	0	0
	4	12	0	9	0	1
		10	0		1
