# Supplementary material for: Lola regulates Drosophila adult midgut homeostasis via non-canonical hippo signaling
Source: eLife. 2020 Jan 14;9:e47542. doi: 10.7554/eLife.47542 (PMC7299341; doi:10.7554/eLife.47542)
Supplement: Figure 6—source data 1. [file elife-47542-fig6-data1.xlsx]

## Sheet: Figure 6J
	quantification of Dref/GFP signal intensity
	intensity of Lola signal		intensity of GFP signal
	control	wts RNAi	control	wts RNAi
	60.81	12.5	10.3	77.41
	57.02	24.21	12.78	85.86
	48.67	30.66	8.2	157.77
	61.58	8.67	1.42	93.38
	48.46	28.39	1.46	81.15
	24.2	10.21	91.41	149.15
	41.03	19.4	1.62	81.9
	63.97	14.82	1.31	56.13
	35.21	6.61	6.5	131.07
	44.82	7.39	8.97	107.36
	55.33	8.05	16.77	129.14
	48.9	10.57	1.51	96.6
	36.85	44.16	12.27	115.97
	32.08	53.86	2.04	123.62
	48.88	31.22	2.05	144.51
	52.48	12	9.69	90.5
	14.14	7.81	89.31	131.58
	47.39	26.65	1.58	55.97
	67.76	10.24	33.56	135.35
	50.83	11.28	1.51	112.34
	49.94	14.97	1.83	55.95
	48.22	39.09	10.79	115.63
	35.4	7.87	15.53	7.87
	36.03	36.54	4.88	100.23
	52.77	21.16	5.43	77.24
	45.54	5.94	5.1	81.16
	73.47	5.84	1.5	68.6
	18.24	5.36	59.93	83.95
	56.13	14.19	34.11	130.69
	43.51	5.85	9.52	153.09
	21.97	5.81	9.76	132.41
	33.32	18.62	8.89	136.86
	21.24	9.29	2.98	137.09
	29.02	57.21	28.18	56.31
	25.62	24.5	1.75	145.45
	33.81	5.64	1.09	129.53
	41.66	12.44	33.38	90.16
	30.43	12.29	12.64	134.76
	9.84	4.59	132.47	102.55
	40.62	16.61	5.88	82.42
	34.1	7.45	33.99	208.78
	33.89	15.01	44.97	80.55
	33.65	41.19	44.79	68.65
	50.85	7.87	47.84	7.87
	44.67	67.82	60.26	134.65
	35.11	38.15	28.63	71.45
	27.68	46.89	3.67	1.62
		72.71		1.28
		58.94		2.99
		69.26		1.56
