# Supplementary material for: Lola regulates Drosophila adult midgut homeostasis via non-canonical hippo signaling
Source: eLife. 2020 Jan 14;9:e47542. doi: 10.7554/eLife.47542 (PMC7299341; doi:10.7554/eLife.47542)
Supplement: Figure 7—source data 1. [file elife-47542-fig7-data1.xlsx]

## Sheet: Figure 7A
	quantification of p-H3+ cell numbers per gut
	control	wts RNAi	lola	lola; wts RNAi	wts RNAi, Dref RNAi	wts RNAi, SkpA RNAi
	0	18	1	6	14	6
	5	12	3	4	8	1
	4	29	3	1	18	6
	2	45	2	1	16	4
	2	46	2	1	7	7
	1	30	1	2	9	2
	1	14	4	3	17	3
	5	28	6	2	15	7
	2	40	4	1	15	6
	3	37	6	1	12	5
	6	25	4	2	10	3
	4	52	7	6	6	3
	0	21	3	6	8	4
	1	12	5	1	5	5
	1	22	2	4	12	2
	9	18	2	6	19	7
	2	9	3	2	23	8
	1	19	8	8	27	3
		21	3	7		9
		15		5
		6

## Sheet: Figure 7F
	quantification of clone sizes
	2D				4D				6D
	control	wtsx1	lola	lola; wtsx1	control	wtsx1	lola	lola; wtsx1	control	wtsx1	lola	lola; wtsx1
	1	2	2	7	1	8	1	9	2	4	1	2
	2	3	1	4	1	3	1	7	3	3	1	2
	2	2	1	1	1	4	1	1	1	5	2	1
	3	5	3	2	1	3	2	1	1	21	4	2
	2	4	2	1	3	14	2	7	2	8	6	4
	1	5	1	2	1	6	2	7	1	24	2	1
	2	4	3	1	1	10	2	16	2	12	3	1
	2	5	2	4	1	5	1	5	1	13	5	4
	1	6	1	1	1	3	1	5	2	11	14	13
	1	4	2	3	1	5	3	1	1	8	1	4
	2	4	2	2	1	4	2	3	2	3	2	6
	2	10	1	2	1	5	2	1	1	10	1	10
	2	4	1	1	3	4	2	1	5	3	3	4
	2	5	1	2	1	7	2	2	1	15	1	3
	1	7	1	2	1	1	1	1	1	17	4	3
	1	4	2	1	2	5	1	6	3	16	4	2
	2	4	1	3	1	5	3	1	2	4	1	5
	1	10	1	1	1	7	3	6	2	3	7	5
	3	8	2	3	2	4	3	4	1	18	1	1
	2	6	1	4	2	6	1	1	3	7	4	3
	1	6	1	2	3	2	1	6	1	3	10	4
	1	10	1	2	2	2	1	3	1	14	1	2
	1	5	1	3	2	2	2	2	3	4	7	7
	2	4	1	4	1	4	1	3	1	5	4	5
	2	11	1	4	1	2	4	2	1	10	1	7
	2	12	2	1	2	2	1	2	3	4	2	4
	3	4	1	2	4	2	1	2	1	6	4	2
	1	8	1	3	1	2	1	13	2	36	1	6
	2	11	1	3	1	2	1	5	1	23	1	2
	3		3	2	1	4	1	4	4	3	1	2
	1		2	3	1	5	1	7	1	9	3	9
	1		1	2	2	6	1	7	2	10	4	3
	1		1	8	1	4	1	3	2	7	3	4
			3	2	1	2	4	2	1	3	5	6
			2	1	2	2	1	2	2	4	6	2
			3	1	1	2	1	3	2	6	3	3
			2	2	1	58	3	1	7	8	3	3
			1	2	1	8	2	1	1	3	4	7
			6	2	1	2	2	3	3	7	3	3
			2	2	1	3	2	3	1	23	3	2
			2	2	1	3	2	3	1	11	4	3
			1	1	2	7	2	7	1	3	1	10
			2	1	2	10	2	3	1	21	1	12
			3	1	1	23	2	3	1	13	2	8
			1	1	1	4	2	2	2	4	1	4
			4	3	1	5	1	3	1	3	2	4
			2	2	2	10	3	6	1	12	1	2
			5	3	1	14	1	2	1	3	1	5
			2	5	1	9	2	1	4	9	2	3
			2	4	3	32	2	3	2	27	2	4
			3	2	3	6	2	1	4	39	2	1
			2	2	2	2	2	1	1	18	2	4
			2	3	4	2	4	1	1	4	2	1
			1	1	2	1	4	2	2	47	4	3
			2	1	1	8	1	4	4	3	4	15
				2	1	6	3	4	4	3	5	3
				2	2	2	2	3	1	5	2	3
				3	3	2	3	4	1	40	2	3
				1	1	5	1	4	1	23	2	3
				1	1	15	2	1	2	6	3	3
				1	2	32	2	2	1	6	1	2
				7	1	4	4	1	3	13	2	7
				3	1	3		2	3	3	3	2
				6	1	2		3	1	7	4	4
				3	1	14		3	1	13	4	1
				1	1	7		2	3	4	1	2
				2	3	15		1	2	3	13	7
				3	3	10		3	7	31	2	3
				1	2	2		1	3	3	2	1
				1	1	8		1	14	4	7
				2	2	31		2	1	7	5
				2	3	4		2	5	6	8
				4	4	46		3	3	14	6
				3	1	21		1	2	4	5
				3	1	6		1	2	6	2
				3	2	8		6	4	31	2
				2	1	15		1	3	12	4
				2	1	6		2	2		2
				1	2	7		4	5		3
				1	1	13		2	4		3
				2	2			2	5		3
				4	2			7	5		3
				5	1			4	3		4
				9	1			3	2		3
				2	1			3	2		2
				1	1			3	2		1
								2	2		4
								2	3		3
								1	4		5
								6	2		3
								1	2		3
								1	2		5

## Sheet: Figure 7-figure supplement 1E
	quantification of p-H3+ cell numbers per gut
	control	wts RNAi	lola	lola; wts RNAi	wts RNAi, Dref RNAi	wts RNAi, SkpA RNAi
	1	26	3	3	9	8
	2	50	6	5	5	13
	4	35	9	14	16	10
	8	53	1	7	36	22
	1	28	6	3	21	9
	3	73	3	2	2	2
	7	30	1	6	35	13
	5	42	4	2	18	4
	6	37		5		8
		28		7		1
		68

## Sheet: Figure 7-figure supplement 2D
	quantification of clone sizes
	control	lola5D2	lola5D2; wts
	1	5	1
	1	3	9
	3	6	15
	2	8	16
	2	3	6
	3	3	12
	2	5	8
	3	1	15
	1	2	5
	13	1	2
	5	5	1
	6	2	4
	4	3	4
	5	1	8
	4	2	2
	7	5	7
	3	8	5
	3	3	7
	4	4	2
	2	15	5
	2	10	9
	2	13	5
	3	16	6
	1	25	4
	1	14	11
	1	12	4
	7	6	3
	1	4	6
	1	3	6
	2	6	23
	4	3	1
	2	5	5
	5	5	6
	1	13	4
	5	17	6
	5	15	26
	3	9	6
	11	11	7
	6	9	3
	9	6	6
	1	16	5
	5	33	20
	11	10	8
	4	8	3
	2	6	3
	7	14	11
	6	5	14
	1	13	2
	3	6	3
	3	6	2
	2	7	5
	13	12	2
	5	5	10
	4	6	8
	3	4	2
	4	2	3
	11	7	9
	9	4	7
	2	10	2
	7	18	2
	10	23	17
	6	7	6
	1	12	4
	2	16	10
	3	4	7
	2	10	2
	14	13	4
	15	1	2
	6	2	4
	2	4	6
	2	3	5
	1	9	2
	4	4	15
	3	7	18
	2	11	6
	4	13	9
	4	6	2
	3	2	4
	9	4	7
	4	3	4
	3	26	5
	3	17	4
	4	2	2
	2	3	3
	1	2	3
	1	6	5
	8	9	2
	4	2	6
	2	16	5
	4	2	1
	3	4	8
	3	4	7
	1	15	10
	3	3	2
	1	3	9
	3	3	2
	4	11	4
	2	13	3
	5	9	5
	5	5	19
	1	2	2
	7	3	11
	3	7	6
	5	6	2
	4	6	2
	3	2	5
	5	9	4
	6	45
	4	15
	6	9
	2	6
	4	5
	3	7
	2	4
	4	9
	5	6
	3	2
	1	1
	6	4
	1	2
	1	4
	2	3
	4	6
	4	1
	8
	3
	1
	4
	2
	2
	2
	2
	1
	3
	1
	4
	5
	2
	2
	3
	4
	4
	5
	7
	2
	2
	3
	4
	3
	4
	5
	2
	3
	3
	2
	3
	2
	1
	4
	2
	4
	6

## Sheet: Figure 7-figure supplement 3E
	quantification of p-H3+ cell numbers per gut
	control	yki	lola	yki; lola
	2	17	7	8
	5	12	2	17
	2	14	7	14
	6	23	4	12
	4	19	4	34
	9	10	3	17
			1	35
				23
				32
