# Supplementary material for: Lola regulates Drosophila adult midgut homeostasis via non-canonical hippo signaling
Source: eLife. 2020 Jan 14;9:e47542. doi: 10.7554/eLife.47542 (PMC7299341; doi:10.7554/eLife.47542)
Supplement: Supplementary file 1. [file elife-47542-supp1.xlsx]

## Sheet: peaks_LolaChIPseq
	chromosome	peakstart	peakend	width	fold_change	-log10pvalue'	relative summit position to peak start	geneStart	geneEnd	geneLength	geneStrand	geneID	transcriptID	distanceToTSS	ENTREZID	SYMBOL	GENENAME	flank_txIds	flank_geneIDs	flank_gene_distances
1	chr3R	9868485	9868947	463	10.0684	168.942	260	9826081	9868120	42040	2	FBgn0037766	FBtr0330082	-365	41215	Teh1	tipE homolog 1	FBtr0082151;FBtr0330082	FBgn0037766;FBgn0037766	-365;-365
2	chr4	1312267	1313378	1112	7.82967	166.799	527	1231883	1271759	39877	1	FBgn0053653	FBtr0307334	80384	NA	NA	NA	NA	NA	NA
3	chrX	80319	81395	1077	7.43005	159.895	553	122493	122706	214	1	FBgn0058469	FBtr0307364	-41098	NA	NA	NA	NA	NA	NA
4	chr4	1293038	1294075	1038	7.45472	158.309	487	1231883	1271759	39877	1	FBgn0053653	FBtr0307334	61155	NA	NA	NA	NA	NA	NA
5	chrX	86606	87739	1134	6.78786	151.322	610	122493	122706	214	1	FBgn0058469	FBtr0307364	-34754	NA	NA	NA	NA	NA	NA
6	chr3R	26261423	26261832	410	8.26085	150.374	224	26254069	26261591	7523	2	FBgn0000064	FBtr0084994	0	43183	Ald	Aldolase	FBtr0084994;FBtr0339614;FBtr0085001;FBtr0306657;FBtr0310661;FBtr0339613	FBgn0000064;FBgn0000064;FBgn0000064;FBgn0000064;FBgn0000064;FBgn0265380	0;0;-11;-11;0;0
7	chr2L	21397219	21397640	422	8.45202	146.304	225	21404181	21404495	315	1	FBgn0051616	FBtr0085889	-6541	NA	NA	NA	NA	NA	NA
8	chr3L	18801194	18801725	532	8.87514	141.799	340	18751749	18801309	49561	2	FBgn0001078	FBtr0075086	0	40045	ftz-f1	ftz transcription factor 1	FBtr0075086;FBtr0347047	FBgn0001078;FBgn0267601	0;0
9	chr2L	12974062	12974455	394	8.78626	135.221	185	12974322	12978607	4286	1	FBgn0263598	FBtr0336614	0	45012	Vha68-2	Vacuolar H[+] ATPase 68 kDa subunit 2	FBtr0336614;FBtr0080418;FBtr0080419;FBtr0080420	FBgn0263598;FBgn0263598;FBgn0263598;FBgn0263598	0;0;0;-167
10	chr4	1318038	1319422	1385	7.92719	132.428	1059	1231883	1271759	39877	1	FBgn0053653	FBtr0307334	86155	NA	NA	NA	NA	NA	NA
11	chr2R	12665717	12666112	396	8.56001	129.485	202	12659497	12665799	6303	2	FBgn0261673	FBtr0087869	0	36395	nemy	no extended memory	FBtr0087869;FBtr0087870;FBtr0302151;FBtr0339740;FBtr0087867;FBtr0087868	FBgn0261673;FBgn0261673;FBgn0261673;FBgn0261673;FBgn0261673;FBgn0261673	0;0;0;0;0;0
12	chr4	1286908	1287836	929	5.44092	125.116	603	1231883	1271759	39877	1	FBgn0053653	FBtr0307334	55025	NA	NA	NA	NA	NA	NA
13	chr2R	25266838	25267750	913	5.34693	123.482	608	25185126	25255318	70193	2	FBgn0035094	FBtr0333172	-11520	38011	CG9380	uncharacterized protein	NA	NA	NA
14	chr3R	10100517	10100957	441	6.19382	121.899	222	10100936	10101034	99	1	FBgn0262459	FBtr0304499	0	NA	NA	NA	FBtr0082200;FBtr0082198;FBtr0308123;FBtr0304361;FBtr0304499;FBtr0309197;FBtr0346908	FBgn0028734;FBgn0028734;FBgn0028734;FBgn0262419;FBgn0262459;FBgn0263413;FBgn0263413	7385;9164;9164;495;0;0;0
15	chr2L	14011552	14011914	363	7.87011	120.342	183	14010565	14010636	72	2	FBgn0028909	FBtr0080609	-916	NA	NA	NA	NA	NA	NA
16	chr3L	18019620	18019980	361	7.87703	118.866	187	17953358	18026032	72675	2	FBgn0000568	FBtr0347013	6052	39999	Eip75B	Ecdysone-induced protein 75B	FBtr0306814;FBtr0347013;FBtr0075148;FBtr0306813	FBgn0000568;FBgn0000568;FBgn0000568;FBgn0000568	0;0;0;0
17	chr3L	17596814	17597212	399	8.10749	118.22	179	17560158	17576626	16469	2	FBgn0000567	FBtr0075204	-20188	39962	Eip74EF	Ecdysone-induced protein 74EF	FBtr0075202;FBtr0075203;FBtr0305796	FBgn0000567;FBgn0000567;FBgn0000567	0;0;0
18	chr2R	8396631	8397126	496	7.95666	114.529	204	8387370	8396280	8911	1	FBgn0261588	FBtr0302918	9261	35813	pdm3	pou domain motif 3	FBtr0088764;FBtr0290124;FBtr0302919;FBtr0339349;FBtr0339350;FBtr0302918	FBgn0033289;FBgn0033289;FBgn0261588;FBgn0261588;FBgn0261588;FBgn0261588	0;0;69141;69141;69141;9261
19	chrX	5916163	5916590	428	7.56457	105.791	244	5913067	5916317	3251	2	FBgn0029823	FBtr0345317	0	31524	Shmt	Serine hydroxymethyl transferase	FBtr0345317;FBtr0070827	FBgn0029823;FBgn0029823	0;0
20	chr3L	16930457	16930921	465	6.73963	105.433	228	16924338	16927434	3097	2	FBgn0036677	FBtr0075307	-3023	39894	CG13023	uncharacterized protein	FBtr0075300;FBtr0075305;FBtr0113174;FBtr0305577;FBtr0075301;FBtr0075304;FBtr0113173;FBtr0075302;FBtr0075303;FBtr0075306	FBgn0036678;FBgn0036678;FBgn0036678;FBgn0036678;FBgn0036678;FBgn0036678;FBgn0036678;FBgn0036678;FBgn0036678;FBgn0036678	0;0;0;0;0;0;0;4615;4615;4615
21	chr2R	25285061	25285997	937	7.23915	105.222	570	25185126	25255318	70193	2	FBgn0035094	FBtr0333172	-29743	38011	CG9380	uncharacterized protein	NA	NA	NA
22	chr2L	2130087	2130534	448	4.68643	104.887	191	2130813	2137043	6231	1	FBgn0004507	FBtr0100485	-279	33386	GlyP	Glycogen phosphorylase	FBtr0100485;FBtr0077828	FBgn0004507;FBgn0004507	0;0
23	chr3R	10076676	10077037	362	5.41899	102.965	174	10073821	10075373	1553	2	FBgn0037786	FBtr0309853	-1303	41236	CG5361	uncharacterized protein	NA	NA	NA
24	chr3L	5511951	5512332	382	7.12853	100.131	190	5503528	5510860	7333	2	FBgn0085371	FBtr0344835	-1091	5740152	CG34342	uncharacterized protein	FBtr0077149	FBgn0035610	17009
25	chr2R	22297789	22298137	349	7.35331	100.098	170	22298214	22301423	3210	2	FBgn0034718	FBtr0342984	3286	37548	wdp	windpipe	FBtr0342984;FBtr0071852;FBtr0071851;FBtr0071849;FBtr0071850	FBgn0034718;FBgn0034718;FBgn0034718;FBgn0034718;FBgn0034718	3286;11813;13169;13800;13800
26	chr3R	31134079	31134426	348	7.10937	98.0036	141	31134392	31178278	43887	1	FBgn0013973	FBtr0085753	0	43682	Gycbeta100B	Guanylyl cyclase beta-subunit at 100B	FBtr0085753	FBgn0013973	0
27	chr3R	26103488	26103802	315	6.26071	97.9302	146	26106868	26130190	23323	1	FBgn0051324	FBtr0084985	-3066	43177	CG31324	uncharacterized protein	NA	NA	NA
28	chr3L	6124645	6125047	403	6.87824	92.6832	211	6125405	6126006	602	1	FBgn0267667	FBtr0347134	-358	NA	NA	NA	FBtr0077062;FBtr0346811;FBtr0346812;FBtr0347134;FBtr0347135	FBgn0002440;FBgn0002440;FBgn0002440;FBgn0267667;FBgn0267667	0;0;0;-358;-358
29	chrX	66738	67989	1252	6.17029	90.7518	553	122493	122706	214	1	FBgn0058469	FBtr0307364	-54504	NA	NA	NA	NA	NA	NA
30	chr3R	30134125	30134805	681	6.48153	90.5587	262	30132981	30134309	1329	2	FBgn0086355	FBtr0085583	0	43582	Tpi	Triose phosphate isomerase	FBtr0085581;FBtr0334658;FBtr0085583;FBtr0085584;FBtr0085582;FBtr0347306	FBgn0039747;FBgn0039747;FBgn0086355;FBgn0086355;FBgn0086355;FBgn0267751	14801;14801;0;0;0;-203
31	chrX	6667	7859	1193	5.85969	88.4279	254	122493	122706	214	1	FBgn0058469	FBtr0307364	-114634	NA	NA	NA	NA	NA	NA
32	chr3R	31127357	31127733	377	5.82993	85.9992	192	31126149	31127335	1187	1	FBgn0039820	FBtr0085736	1208	43680	CG15554	uncharacterized protein	FBtr0085736;FBtr0309195;FBtr0309194;FBtr0085737	FBgn0039820;FBgn0039821;FBgn0039821;FBgn0039821	1208;2648;2688;2933
33	chr3R	28677721	28678068	348	6.67454	84.546	169	28675041	28695939	20899	1	FBgn0039594	FBtr0085308	2680	43391	CG9990	uncharacterized protein	FBtr0085308	FBgn0039594	0
34	chr2R	25279672	25280181	510	6.63683	83.7045	307	25185126	25255318	70193	2	FBgn0035094	FBtr0333172	-24354	38011	CG9380	uncharacterized protein	NA	NA	NA
35	chrX	21174902	21175251	350	6.59912	82.8654	185	21187979	21188759	781	1	FBgn0267062	FBtr0346048	-12728	NA	NA	NA	NA	NA	NA
36	chr2R	21608097	21608455	359	6.5248	82.5491	174	21605676	21608125	2450	2	FBgn0034638	FBtr0344882	0	37458	CG10433	uncharacterized protein	FBtr0344882;FBtr0342900;FBtr0344613	FBgn0034638;FBgn0034639;FBgn0262888	0;0;0
37	chrX	3835800	3836188	389	6.18857	81.5563	196	3836080	3857621	21542	1	FBgn0000542	FBtr0070606	0	31339	ec	echinus	FBtr0112801;FBtr0070606	FBgn0000542;FBgn0000542	0;0
38	chr4	1305628	1306835	1208	6.42809	80.6546	995	1231883	1271759	39877	1	FBgn0053653	FBtr0307334	73745	NA	NA	NA	NA	NA	NA
39	chr2L	1362275	1362607	333	5.46529	77.692	155	1359837	1361821	1985	2	FBgn0053126	FBtr0343844	-454	33324	NLaz	Neural Lazarillo	FBtr0343844	FBgn0053126	-454
40	chr3L	18025990	18026330	341	6.25974	75.4267	188	17953358	18026032	72675	2	FBgn0000568	FBtr0347013	0	39999	Eip75B	Ecdysone-induced protein 75B	FBtr0306814;FBtr0347013;FBtr0075148;FBtr0306813	FBgn0000568;FBgn0000568;FBgn0000568;FBgn0000568	0;0;0;0
41	chr3R	17603615	17603970	356	5.78638	75.3298	174	17606106	17608541	2436	1	FBgn0038524	FBtr0083462	-2136	42115	sll	slalom	NA	NA	NA
42	chr3L	11070298	11070664	367	6.22203	74.6129	173	11070526	11073348	2823	1	FBgn0263241	FBtr0076205	0	39238	Mocs1	Molybdenum cofactor synthesis 1	FBtr0076239;FBtr0076205;FBtr0076204	FBgn0036121;FBgn0263241;FBgn0263241	-434;0;0
43	chr3R	9784372	9784743	372	6.09937	74.2072	167	9784653	9789323	4671	1	FBgn0037754	FBtr0082139	0	41203	CG8500	uncharacterized protein	FBtr0334686;FBtr0082158;FBtr0082139	FBgn0002868;FBgn0002868;FBgn0037754	-2;-2;0
44	chr2L	73020	73518	499	4.79208	73.5353	230	73485	76211	2727	1	FBgn0031213	FBtr0302164	0	33162	galectin	galectin	FBtr0306540;FBtr0078101;FBtr0302164;FBtr0331680;FBtr0344052;FBtr0344053	FBgn0031213;FBgn0031213;FBgn0031213;FBgn0031213;FBgn0266322;FBgn0266322	0;0;0;0;0;0
45	chrX	58540	59603	1064	3.99025	73.0564	230	122493	122706	214	1	FBgn0058469	FBtr0307364	-62890	NA	NA	NA	NA	NA	NA
46	chr3L	3239422	3239861	440	3.47918	72.1817	241	3236947	3239578	2632	2	FBgn0035425	FBtr0073093	0	38400	CG17746	uncharacterized protein	FBtr0073094;FBtr0073093	FBgn0035425;FBgn0035425	-49;0
47	chr3L	1188831	1189156	326	5.82694	72.1357	147	1189588	1190472	885	1	FBgn0035186	FBtr0072625	-432	38120	CG13912	uncharacterized protein	FBtr0072625	FBgn0035186	-432
48	chr2L	14706180	14706589	410	6.06663	71.7596	180	14712471	14713118	648	1	FBgn0028855	FBtr0343706	-5882	34853	CG15282	uncharacterized protein	NA	NA	NA
49	chr3R	27228370	27228745	376	5.30109	70.6746	187	27227070	27228561	1492	2	FBgn0261995	FBtr0347068	0	43276	CG42813	uncharacterized protein	FBtr0347068;FBtr0303825;FBtr0303824	FBgn0261995;FBgn0261995;FBgn0261996	0;0;0
50	chr3L	18791110	18791744	635	6.03348	70.5839	316	18751749	18801309	49561	2	FBgn0001078	FBtr0075086	9565	40045	ftz-f1	ftz transcription factor 1	FBtr0075086;FBtr0347047	FBgn0001078;FBgn0267601	0;0
51	chr3R	20908664	20909011	348	6.03348	70.5839	184	20911640	20912869	1230	1	FBgn0264915	FBtr0335017	-2629	NA	NA	NA	FBtr0083978;FBtr0335015;FBtr0335016;FBtr0083984;FBtr0344322	FBgn0038840;FBgn0038840;FBgn0038840;FBgn0051191;FBgn0051191	6708;6708;6708;36519;36519
52	chrX	12784992	12785341	350	6.03348	70.5839	174	12776572	12784958	8387	2	FBgn0052647	FBtr0073703	-34	326226	CG32647	uncharacterized protein	FBtr0346126;FBtr0340412;FBtr0073702;FBtr0073703;FBtr0333525	FBgn0052647;FBgn0052647;FBgn0052647;FBgn0052647;FBgn0259171	-34;-34;-34;-34;111986
53	chr4	979866	980313	448	5.88265	67.4092	228	962341	978489	16149	2	FBgn0039932	FBtr0301335	-1377	43835	fuss	fussel	NA	NA	NA
54	chrX	20792068	20792440	373	5.88265	67.4092	191	20771265	20792853	21589	2	FBgn0085387	FBtr0114645	413	33062	shakB	shaking B	FBtr0342859;FBtr0309370;FBtr0309369;FBtr0112570;FBtr0114645;FBtr0112569	FBgn0085387;FBgn0085387;FBgn0085387;FBgn0085387;FBgn0085387;FBgn0085387	0;0;0;0;0;0
55	chr3L	21209936	21210409	474	5.09505	65.189	291	21208148	21210084	1937	2	FBgn0037059	FBtr0078310	0	40341	CG10510	uncharacterized protein	FBtr0078310;FBtr0307386;FBtr0307387;FBtr0331854	FBgn0037059;FBgn0037060;FBgn0037060;FBgn0037060	0;0;0;0
56	chr3L	16985535	16985928	394	5.76952	65.0572	177	16986635	16994388	7754	1	FBgn0261547	FBtr0302647	-707	39900	Exn	Ephexin	FBtr0302651;FBtr0302650	FBgn0261547;FBgn0261547	0;0
57	chr3R	5282678	5283318	641	5.26667	65.0533	284	5272947	5283379	10433	2	FBgn0013576	FBtr0078815	61	45467	mtd	mustard	FBtr0078814;FBtr0078810;FBtr0078815;FBtr0078813;FBtr0333695;FBtr0100197;FBtr0110932;FBtr0078812;FBtr0078818;FBtr0078811;FBtr0100199;FBtr0110933;FBtr0273434;FBtr0306694;FBtr0308581;FBtr0273432;FBtr0273433;FBtr0306695;FBtr0308580;FBtr0273431	FBgn0013576;FBgn0013576;FBgn0013576;FBgn0013576;FBgn0013576;FBgn0013576;FBgn0013576;FBgn0013576;FBgn0013576;FBgn0013576;FBgn0013576;FBgn0013576;FBgn0013576;FBgn0013576;FBgn0013576;FBgn0013576;FBgn0013576;FBgn0013576;FBgn0013576;FBgn0013576	0;0;0;0;0;0;0;0;0;0;0;0;0;0;0;0;0;0;0;0
58	chr2L	9567396	9567709	314	5.65639	62.7305	136	9547720	9566750	19031	2	FBgn0032129	FBtr0079860	-646	34274	jp	junctophilin	FBtr0335493	FBgn0264998	1076
59	chr2L	18944139	18944461	323	5.65639	62.7305	153	18916525	18943960	27436	2	FBgn0032723	FBtr0081193	-179	35149	ssp3	short spindle 3	FBtr0342929;FBtr0081193	FBgn0032723;FBgn0032723	-179;-179
60	chr2L	13458989	13459351	363	4.29627	62.5661	181	13459681	13460183	503	1	FBgn0261992	FBtr0303821	-330	34764	CG42810	uncharacterized protein	FBtr0303821;FBtr0308949;FBtr0346425	FBgn0261992;FBgn0263354;FBgn0267244	-330;0;-384
61	chr2L	5624059	5624400	342	5.61868	61.9607	175	5621541	5623762	2222	2	FBgn0031726	FBtr0343244	-297	19836250	Cyp6a16	Cyp6a16	FBtr0343243;FBtr0343244	FBgn0031726;FBgn0031726	-297;-297
62	chr3R	24057192	24057553	362	5.00046	61.5473	198	24055080	24057310	2231	2	FBgn0001230	FBtr0084589	0	42852	Hsp68	Heat shock protein 68	FBtr0084589	FBgn0001230	0
63	chr3R	30527045	30527678	634	5.58097	61.1938	438	30519390	30527037	7648	2	FBgn0027654	FBtr0085683	-8	43630	jdp	jdp	FBtr0085681;FBtr0085682;FBtr0085683	FBgn0027654;FBgn0027654;FBgn0027654	-8;-8;-8
64	chr3L	1971134	1971462	329	4.68031	60.5815	167	1970191	1971200	1010	2	FBgn0035299	FBtr0072852	0	38263	CG11815	uncharacterized protein	FBtr0072852;FBtr0072845	FBgn0035299;FBgn0035300	0;-176
65	chr3L	16884128	16884433	306	4.90027	59.6446	147	16882191	16882539	349	1	FBgn0267558	FBtr0346966	1937	NA	NA	NA	FBtr0302779;FBtr0302781;FBtr0306704	FBgn0261565;FBgn0261565;FBgn0261565	0;0;0
66	chr3R	30195502	30195921	420	4.73283	58.9385	184	30194790	30196228	1439	2	FBgn0039755	FBtr0085572	307	43592	CG15531	uncharacterized protein	FBtr0085572;FBtr0085571	FBgn0039755;FBgn0039756	0;7077
67	chr2R	14903665	14904040	376	5.46784	58.9106	197	14901475	14903816	2342	2	FBgn0027596	FBtr0303758	0	36668	Kank	kank	FBtr0303758;FBtr0087431;FBtr0301334;FBtr0303756;FBtr0332856;FBtr0087430;FBtr0087429;FBtr0112929;FBtr0303757	FBgn0027596;FBgn0027596;FBgn0027596;FBgn0027596;FBgn0027596;FBgn0027596;FBgn0027596;FBgn0027596;FBgn0027596	0;0;0;0;0;0;0;0;0
68	chr2L	1909728	1910083	356	5.13447	57.712	170	1911742	1943818	32077	1	FBgn0031374	FBtr0309828	-1659	33367	Wdr62	WD repeat domain 62	FBtr0113012;FBtr0333007;FBtr0077811	FBgn0031374;FBgn0031374;FBgn0031374	0;0;0
69	chrX	7678888	7679188	301	5.39243	57.4033	151	7679331	7679621	291	2	FBgn0267227	FBtr0346400	433	NA	NA	NA	FBtr0331733;FBtr0346400	FBgn0004198;FBgn0267227	69740;433
70	chr2R	20884382	20884795	414	5.06646	56.2626	203	20879930	20882663	2734	1	FBgn0034558	FBtr0304717	4452	37363	Cib2	Calcium and integrin binding family member 2	FBtr0110772;FBtr0342795;FBtr0342796;FBtr0342797;FBtr0290289;FBtr0342798;FBtr0342799;FBtr0342800	FBgn0015524;FBgn0015524;FBgn0015524;FBgn0015524;FBgn0015524;FBgn0015524;FBgn0015524;FBgn0015524	0;0;0;0;0;0;0;0
71	chr2L	1987497	1987962	466	4.5499	55.9555	302	1984512	1987758	3247	2	FBgn0001125	FBtr0077867	0	33373	Got2	Glutamate oxaloacetate transaminase 2	FBtr0077867;FBtr0077816	FBgn0001125;FBgn0031381	0;-328
72	chr3L	5797290	5797626	337	5.20788	55.929	159	5794405	5796543	2139	2	FBgn0035638	FBtr0331522	-747	38653	Tektin-C	Tektin C	FBtr0333264	FBgn0283472	0
73	chr2R	18829522	18829870	349	4.38653	54.7558	184	18822188	18829699	7512	2	FBgn0034396	FBtr0303237	0	37172	CG15097	uncharacterized protein	FBtr0303237;FBtr0330604;FBtr0330605;FBtr0330053	FBgn0034396;FBgn0034396;FBgn0034396;FBgn0034397	0;0;0;-461
74	chr3R	23942907	23943344	438	4.85481	54.3009	239	23935958	23943101	7144	2	FBgn0001098	FBtr0089497	0	42832	Gdh	Glutamate dehydrogenase	FBtr0089497;FBtr0089498;FBtr0308071;FBtr0084513;FBtr0084514	FBgn0001098;FBgn0001098;FBgn0039131;FBgn0039131;FBgn0039131	0;0;5039;5080;5080
75	chr3R	12723837	12724155	319	5.16617	52.9545	183	12713103	12722442	9340	2	FBgn0002719	FBtr0082660	-1395	47173	Men	Malic enzyme	NA	NA	NA
76	chrY	2867446	2867798	353	5.16617	52.9545	155	3022289	3024024	1736	1	FBgn0265047	FBtr0302230	-154491	NA	NA	NA	NA	NA	NA
77	chr2L	4810069	4810498	430	5.12846	52.2239	139	4811711	4811945	235	2	FBgn0266835	FBtr0345563	1447	NA	NA	NA	NA	NA	NA
78	chr3L	3252022	3252335	314	3.48434	51.0939	158	3251022	3251118	97	1	FBgn0262368	FBtr0304174	1000	NA	NA	NA	FBtr0309982;FBtr0344727	FBgn0263617;FBgn0263617	0;0
79	chrX	13563497	13563836	340	5.01533	50.0513	169	13563823	13590570	26748	1	FBgn0086674	FBtr0113443	0	32312	Tango13	Transport and Golgi organization 13	FBtr0073800;FBtr0113443;FBtr0310432;FBtr0333723;FBtr0310433;FBtr0452126	FBgn0052633;FBgn0086674;FBgn0086674;FBgn0086674;FBgn0086674;FBgn0284227	1826;0;0;0;0;0
80	chr2L	17450066	17450638	573	3.29458	48.7154	320	17436830	17450364	13535	2	FBgn0260632	FBtr0081005	0	35047	dl	dorsal	FBtr0081005;FBtr0081006;FBtr0081007;FBtr0347483	FBgn0260632;FBgn0260632;FBgn0260632;FBgn0267923	0;0;0;0
81	chr2R	16551911	16552320	410	4.2573	48.5374	167	16552258	16558486	6229	1	FBgn0034135	FBtr0087093	0	36848	Syn2	Syntrophin-like 2	FBtr0087093;FBtr0087094	FBgn0034135;FBgn0034135	0;0
82	chr3L	3303181	3303515	335	3.78812	48.4266	168	3299336	3303112	3777	2	FBgn0035431	FBtr0073086	-69	38406	CG14968	uncharacterized protein	FBtr0073086;FBtr0073054;FBtr0073056;FBtr0073057;FBtr0330103;FBtr0073055	FBgn0035431;FBgn0035432;FBgn0035432;FBgn0035432;FBgn0035432;FBgn0035432	-69;-193;-193;-193;-193;-193
83	chr3R	10093450	10093912	463	3.97894	48.2901	194	10093761	10094625	865	1	FBgn0263413	FBtr0309196	0	NA	NA	NA	FBtr0309196;FBtr0309197;FBtr0346908	FBgn0263413;FBgn0263413;FBgn0263413	0;0;0
84	chrX	2145132	2145470	339	4.86918	48.276	141	2145136	2148566	3431	1	FBgn0004654	FBtr0070384	0	31185	Pgd	Phosphogluconate dehydrogenase	FBtr0070384;FBtr0331410;FBtr0070381;FBtr0070382;FBtr0070383	FBgn0004654;FBgn0004654;FBgn0023507;FBgn0023507;FBgn0023507	0;0;0;0;2445
85	chr2L	15643831	15644130	300	4.90221	47.9079	162	15630083	15634987	4905	1	FBgn0028518	FBtr0343717	13748	34920	CG18480	uncharacterized protein	FBtr0344777;FBtr0344778	FBgn0028863;FBgn0028863	39145;74142
86	chr3R	22094003	22094292	290	4.78908	45.7942	168	22087183	22088501	1319	1	FBgn0040582	FBtr0347257	6820	50055	CG5791	uncharacterized protein	NA	NA	NA
87	chr3L	8360878	8361180	303	4.75137	45.0964	155	8356404	8360906	4503	2	FBgn0001248	FBtr0076667	0	44291	Idh	Isocitrate dehydrogenase	FBtr0076673;FBtr0076667;FBtr0076668;FBtr0114548	FBgn0001248;FBgn0001248;FBgn0001248;FBgn0001248	-403;0;0;0
88	chrX	8192989	8193342	354	4.58437	44.1247	162	8193200	8239427	46228	1	FBgn0261873	FBtr0100375	0	44861	sdt	stardust	FBtr0100376;FBtr0340141;FBtr0333720;FBtr0340142;FBtr0308218;FBtr0308220;FBtr0100375;FBtr0333721;FBtr0089978	FBgn0261873;FBgn0261873;FBgn0261873;FBgn0261873;FBgn0261873;FBgn0261873;FBgn0261873;FBgn0261873;FBgn0261873	0;0;0;0;0;0;0;0;0
89	chr3R	7753637	7753923	287	4.67595	43.7111	126	7747913	7750079	2167	2	FBgn0037513	FBtr0081780	-3558	40916	pyd3	pyd3	NA	NA	NA
90	chrX	8574006	8574353	348	4.67595	43.7111	188	8574306	8588528	14223	1	FBgn0030052	FBtr0071214	0	31798	CG12065	uncharacterized protein	FBtr0071230;FBtr0300731;FBtr0332628;FBtr0071214;FBtr0071215;FBtr0071216;FBtr0071217;FBtr0300750;FBtr0300751	FBgn0030051;FBgn0030051;FBgn0030051;FBgn0030052;FBgn0030052;FBgn0030052;FBgn0030052;FBgn0030052;FBgn0030052	-413;-413;-413;0;0;0;0;0;0
91	chr3R	23214813	23215076	264	4.60192	43.6506	109	23185580	23214557	28978	2	FBgn0262975	FBtr0306755	-256	42743	cnc	cap-n-collar	FBtr0306755;FBtr0306748;FBtr0306753;FBtr0306754;FBtr0330372;FBtr0306752;FBtr0308226;FBtr0308227	FBgn0262975;FBgn0262975;FBgn0262975;FBgn0262975;FBgn0262975;FBgn0262975;FBgn0262975;FBgn0262975	0;0;0;0;0;0;0;0
92	chr3R	18226127	18226521	395	4.48966	43.491	233	18226396	18228718	2323	1	FBgn0262559	FBtr0083563	0	42185	Mdh2	Malate dehydrogenase 2	FBtr0083608;FBtr0083563	FBgn0038586;FBgn0262559	-45;0
93	chr2R	22133922	22134190	269	4.63824	43.0237	136	22130112	22131299	1188	2	FBgn0085234	FBtr0112398	-2623	37526	CG34205	uncharacterized protein	NA	NA	NA
94	chr3R	23191297	23191670	374	4.32123	42.361	163	23185580	23191283	5704	2	FBgn0262975	FBtr0306750	-14	42743	cnc	cap-n-collar	FBtr0306744;FBtr0306750;FBtr0336455;FBtr0306749;FBtr0306755;FBtr0306748;FBtr0306753;FBtr0306754;FBtr0330372;FBtr0306752;FBtr0308226;FBtr0308227	FBgn0262975;FBgn0262975;FBgn0262975;FBgn0262975;FBgn0262975;FBgn0262975;FBgn0262975;FBgn0262975;FBgn0262975;FBgn0262975;FBgn0262975;FBgn0262975	-177;-14;0;0;0;0;0;0;0;0;0;0
95	chr2L	10964485	10964835	351	4.60053	42.3397	164	10917692	10964153	46462	2	FBgn0261871	FBtr0340554	-332	3346227	dpr2	defective proboscis extension response 2	FBtr0080172;FBtr0340552;FBtr0080170;FBtr0080171;FBtr0340551;FBtr0340550;FBtr0080169;FBtr0340553;FBtr0340554	FBgn0053129;FBgn0053129;FBgn0053129;FBgn0053129;FBgn0053129;FBgn0053129;FBgn0053129;FBgn0261871;FBgn0261871	1788;1976;3331;3331;3331;5368;5440;-332;-332
96	chr2R	23994959	23995274	316	4.1234	42.2452	147	23992138	23995055	2918	2	FBgn0034951	FBtr0072201	0	37825	CG3860	uncharacterized protein	FBtr0072201;FBtr0343288;FBtr0343285;FBtr0343286;FBtr0113464;FBtr0343283;FBtr0343284;FBtr0343287	FBgn0034951;FBgn0034951;FBgn0053519;FBgn0053519;FBgn0053519;FBgn0053519;FBgn0053519;FBgn0053519	0;0;16748;16748;18980;18980;18980;18980
97	chr3L	17962210	17962580	371	3.62272	41.171	196	17953358	17961814	8457	2	FBgn0000568	FBtr0075151	-396	39999	Eip75B	Ecdysone-induced protein 75B	FBtr0306814;FBtr0075150;FBtr0075149;FBtr0075151;FBtr0347013;FBtr0075148;FBtr0306813	FBgn0000568;FBgn0000568;FBgn0000568;FBgn0000568;FBgn0000568;FBgn0000568;FBgn0000568	0;0;0;-396;0;0;0
98	chr2R	7024811	7025214	404	4.3184	41.1191	156	7025010	7028082	3073	1	FBgn0033127	FBtr0089023	0	35615	Tsp42Ef	Tetraspanin 42Ef	FBtr0089023	FBgn0033127	0
99	chr3R	12221243	12221659	417	4.52511	40.9824	256	12219881	12221464	1584	2	FBgn0037999	FBtr0082623	0	41480	CG4860	uncharacterized protein	FBtr0082623;FBtr0347166	FBgn0037999;FBgn0267676	0;0
100	chr3L	8158788	8159343	556	4.4874	40.3091	167	8154681	8158900	4220	2	FBgn0259916	FBtr0300199	0	8674111	CG42445	uncharacterized protein	FBtr0300199;FBtr0332760;FBtr0332759	FBgn0259916;FBgn0259916;FBgn0264478	0;0;431
101	chr3L	19091711	19092067	357	3.29671	40.0962	192	19092670	19094760	2091	1	FBgn0036846	FBtr0075026	-603	40083	MESR6	Misexpression suppressor of ras 6	NA	NA	NA
102	chrY	2870682	2871092	411	4.44969	39.6395	216	3022289	3024024	1736	1	FBgn0265047	FBtr0302230	-151197	NA	NA	NA	NA	NA	NA
103	chr3L	22470311	22470645	335	4.38278	39.6228	150	22470556	22473509	2954	1	FBgn0037166	FBtr0078506	0	40471	CG11426	uncharacterized protein	FBtr0078505;FBtr0078506	FBgn0037165;FBgn0037166	1449;0
104	chr3R	22564760	22565028	269	4.41199	38.9734	143	22558342	22562572	4231	2	FBgn0038986	FBtr0084281	-2188	42658	sit	stuck in traffic	NA	NA	NA
105	chr2R	7735409	7735782	374	3.99499	38.8133	212	7718446	7735622	17177	2	FBgn0042135	FBtr0088935	0	59173	CG18812	uncharacterized protein	FBtr0088935;FBtr0330328	FBgn0042135;FBgn0042135	0;0
106	chr2R	9308451	9308948	498	4.37428	38.3111	335	9302823	9308722	5900	2	FBgn0033402	FBtr0333000	0	35956	Myd88	Myd88	FBtr0333000;FBtr0345024;FBtr0088598;FBtr0088558;FBtr0332997;FBtr0332996	FBgn0033402;FBgn0033402;FBgn0033402;FBgn0033403;FBgn0033405;FBgn0033405	0;-63;0;42707;79306;80519
107	chrX	3252673	3252979	307	4.37428	38.3111	149	3250089	3251040	952	1	FBgn0003374	FBtr0346736	2584	NA	NA	NA	FBtr0070509;FBtr0333315;FBtr0333316;FBtr0333317	FBgn0000479;FBgn0000479;FBgn0000479;FBgn0000479	0;0;0;0
108	chr3L	6619145	6619420	276	4.33657	37.6525	125	6624032	6635059	11028	1	FBgn0004619	FBtr0076982	-4612	38742	GluRIA	Glutamate receptor IA	FBtr0076978	FBgn0035708	9820
109	chr3L	8912334	8912671	338	4.33657	37.6525	161	8912499	8932065	19567	1	FBgn0035936	FBtr0076506	0	39017	Tsp66E	Tetraspanin 66E	FBtr0076506;FBtr0076507;FBtr0076508;FBtr0273291;FBtr0273285;FBtr0273287;FBtr0273290;FBtr0273289;FBtr0273288;FBtr0273286	FBgn0035936;FBgn0035936;FBgn0035936;FBgn0266757;FBgn0266757;FBgn0266757;FBgn0266757;FBgn0266757;FBgn0266757;FBgn0266757	0;0;0;-180;-167;-167;-167;-148;0;0
110	chrX	18319912	18320210	299	4.33657	37.6525	146	18314124	18321193	7070	2	FBgn0030912	FBtr0074579	983	32814	CG6023	uncharacterized protein	FBtr0074579	FBgn0030912	0
111	chr2L	17433129	17433475	347	3.39292	37.1672	152	17413248	17433161	19914	2	FBgn0011274	FBtr0301578	0	35045	Dif	Dorsal-related immunity factor	FBtr0301578;FBtr0080980	FBgn0011274;FBgn0032636	0;-387
112	chr2R	20618019	20618451	433	4.29886	36.9976	207	20606881	20618217	11337	2	FBgn0050147	FBtr0086255	0	37328	Hil	Hillarin	FBtr0086226;FBtr0086225;FBtr0086255;FBtr0086256	FBgn0034527;FBgn0034527;FBgn0050147;FBgn0050147	-52;-178;0;0
113	chr3L	16470105	16470398	294	4.20017	36.3647	126	16470386	16483650	13265	2	FBgn0004569	FBtr0075408	13252	39833	aos	argos	FBtr0075408;FBtr0075390	FBgn0004569;FBgn0053158	0;0
114	chr2L	8326917	8327168	252	4.26115	36.3464	129	8327456	8332911	5456	1	FBgn0032022	FBtr0079602	-288	34144	CG14275	uncharacterized protein	FBtr0079602	FBgn0032022	-288
115	chr3R	6170726	6171007	282	4.18573	35.0556	135	6173549	6174971	1423	1	FBgn0037406	FBtr0078588	-2542	40752	Osi1	Osiris 1	FBtr0078587	FBgn0037405	3243
116	chr3R	18916816	18917241	426	4.00241	34.4479	232	18918260	18926849	8590	1	FBgn0261113	FBtr0083701	-1019	42267	Xrp1	Xrp1	FBtr0083700	FBgn0261113	0
117	chr2L	11878869	11879173	305	4.14802	34.416	143	11814930	11877237	62308	2	FBgn0264815	FBtr0344148	-1632	34594	Pde1c	Phosphodiesterase 1c	FBtr0334140;FBtr0334135;FBtr0334141;FBtr0334139;FBtr0334136	FBgn0264815;FBgn0264815;FBgn0264815;FBgn0264815;FBgn0264815	0;0;0;0;0
118	chr2R	6610248	6610585	338	4.14802	34.416	170	6610487	6619382	8896	1	FBgn0086655	FBtr0114364	0	35555	jing	jing	FBtr0114365;FBtr0114364;FBtr0332950	FBgn0086655;FBgn0086655;FBgn0086655	0;0;0
119	chr3L	20230330	20230681	352	3.67601	34.4078	165	20231669	20233255	1587	1	FBgn0036956	FBtr0074827	-988	40218	CG13813	uncharacterized protein	FBtr0074825;FBtr0074826;FBtr0332693	FBgn0260397;FBgn0260397;FBgn0260397	3949;3949;3949
120	chr4	1084705	1084989	285	4.00533	34.1983	119	1077331	1084796	7466	2	FBgn0024913	FBtr0089209	0	43826	Actbeta	Activin-beta	FBtr0089209	FBgn0024913	0
121	chr3L	2409330	2409592	263	3.35373	34.1553	160	2412088	2464849	52762	1	FBgn0266696	FBtr0345088	-2496	38306	Svil	Supervillin	FBtr0345102;FBtr0345115;FBtr0345110;FBtr0345113;FBtr0345109;FBtr0345112;FBtr0345114;FBtr0345111	FBgn0266696;FBgn0266696;FBgn0266696;FBgn0266696;FBgn0266696;FBgn0266696;FBgn0266696;FBgn0266696	0;30503;0;21338;0;0;8821;0
122	chr3L	7837147	7837421	275	4.11031	33.7803	149	7814337	7833073	18737	2	FBgn0016694	FBtr0300500	-4074	45588	Pdp1	PAR-domain protein 1	FBtr0306535;FBtr0346536;FBtr0076776;FBtr0076777;FBtr0300499;FBtr0332081;FBtr0332082;FBtr0076775;FBtr0332083	FBgn0016694;FBgn0016694;FBgn0016694;FBgn0016694;FBgn0016694;FBgn0016694;FBgn0016694;FBgn0016694;FBgn0016694	0;0;0;0;0;0;0;0;0
123	chr3R	13260130	13260454	325	4.11031	33.7803	142	13260356	13262227	1872	1	FBgn0040551	FBtr0082735	0	50024	CG11686	uncharacterized protein	FBtr0082735;FBtr0335222	FBgn0040551;FBgn0040551	0;0
124	chrX	3835448	3835740	293	3.72052	33.3905	106	3836080	3857621	21542	1	FBgn0000542	FBtr0070606	-340	31339	ec	echinus	FBtr0112801;FBtr0070606	FBgn0000542;FBgn0000542	0;0
125	chr2R	7381846	7382158	313	4.01755	33.2001	175	7317924	7381899	63976	2	FBgn0033159	FBtr0334801	0	35652	Dscam1	Down syndrome cell adhesion molecule 1	FBtr0089015;FBtr0336916;FBtr0334801;FBtr0089016;FBtr0089018;FBtr0089019;FBtr0089020;FBtr0111049;FBtr0111050;FBtr0111051;FBtr0111052;FBtr0111053;FBtr0111054;FBtr0111055;FBtr0111056;FBtr0111057;FBtr0111058;FBtr0111059;FBtr0111060;FBtr0111061;FBtr0111062;FBtr0111063;FBtr0111064;FBtr0111065;FBtr0111066;FBtr0111067;FBtr0111068;FBtr0111069;FBtr0111070;FBtr0111071;FBtr0111072;FBtr0111073;FBtr0111074;FBt…	FBgn0000352;FBgn0000352;FBgn0033159;FBgn0033159;FBgn0033159;FBgn0033159;FBgn0033159;FBgn0033159;FBgn0033159;FBgn0033159;FBgn0033159;FBgn0033159;FBgn0033159;FBgn0033159;FBgn0033159;FBgn0033159;FBgn0033159;FBgn0033159;FBgn0033159;FBgn0033159;FBgn0033159;FBgn0033159;FBgn0033159;FBgn0033159;FBgn0033159;FBgn0033159;FBgn0033159;FBgn0033159;FBgn0033159;FBgn0033159;FBgn0033159;FBgn0033159;FBgn0033159;FBg…	4957;4957;0;0;0;0;0;0;0;0;0;0;0;0;0;0;0;0;0;0;0;0;0;0;0;0;0;0;0;0;0;0;0;0;0;0;0;0;0;0;0;0;0;0;0;0;0;0;0;0;0;0;0;0;0;0;0;0;0;0;0;0;0;0;0;0;0;0;0;0;0;0;0;0;0;0;0
126	chr3L	18114350	18114660	311	4.01755	33.2001	173	18114284	18115975	1692	1	FBgn0052195	FBtr0333697	66	317907	CG32195	uncharacterized protein	FBtr0075123;FBtr0075124;FBtr0333696;FBtr0075125;FBtr0333697	FBgn0036777;FBgn0036777;FBgn0052195;FBgn0052195;FBgn0052195	0;0;0;0;0
127	chr3L	1890962	1891276	315	3.45528	32.748	136	1889490	1891462	1973	1	FBgn0262624	FBtr0072837	1472	38251	Tmhs	Tetraspan membrane protein in hair cell stereocilia	FBtr0072836;FBtr0072837	FBgn0262624;FBgn0262624	0;0
128	chr3R	8820650	8820921	272	3.45256	32.0212	108	8813490	8820682	7193	2	FBgn0037636	FBtr0334659	0	41058	CG9821	uncharacterized protein	FBtr0334659;FBtr0081931;FBtr0334660;FBtr0081932;FBtr0344598;FBtr0344597	FBgn0037636;FBgn0037636;FBgn0037636;FBgn0037636;FBgn0262604;FBgn0262604	0;0;0;0;0;0
129	chr3R	27561169	27561474	306	3.73314	31.994	172	27559379	27561319	1941	2	FBgn0039525	FBtr0085210	0	43311	CG5646	uncharacterized protein	FBtr0085208;FBtr0085204;FBtr0085205;FBtr0085210;FBtr0091695	FBgn0027492;FBgn0027492;FBgn0027492;FBgn0039525;FBgn0065105	20069;20767;20767;0;-199
130	chr2L	19756725	19757048	324	3.99718	31.897	193	19742817	19756904	14088	2	FBgn0032817	FBtr0081324	0	35262	CG10631	uncharacterized protein	FBtr0081324;FBtr0081323	FBgn0032817;FBgn0032818	0;1567
131	chr3R	11562810	11563154	345	3.99718	31.897	149	11559896	11563292	3397	2	FBgn0037912	FBtr0100461	138	3772221	sea	scheggia	FBtr0100461;FBtr0100465;FBtr0100464;FBtr0100323	FBgn0037912;FBgn0037912;FBgn0037912;FBgn0037913	0;0;0;0
132	chr3R	20464374	20464725	352	3.99718	31.897	186	20378996	20449687	70692	2	FBgn0262869	FBtr0340192	-14687	3346162	Gfrl	Glial cell line-derived neurotrophic family receptor-like	FBtr0346115;FBtr0306200;FBtr0306201;FBtr0306202;FBtr0306204;FBtr0330033;FBtr0306205	FBgn0262869;FBgn0262869;FBgn0262869;FBgn0262869;FBgn0262869;FBgn0262869;FBgn0262869	0;0;0;0;0;0;0
133	chr2L	22179609	22180170	562	3.52145	31.8958	220	22175415	22183991	8577	1	FBgn0032981	FBtr0304739	4194	35447	CG3635	uncharacterized protein	FBtr0299879;FBtr0304739	FBgn0032981;FBgn0032981	0;0
134	chr2L	8888859	8889178	320	3.80835	31.7208	160	8887405	8888028	624	2	FBgn0265588	FBtr0340264	-831	NA	NA	NA	NA	NA	NA
135	chr2R	6015898	6016202	305	3.64363	31.555	157	6013910	6015689	1780	2	FBgn0000043	FBtr0086029	-209	35526	Act42A	Actin 42A	FBtr0086029	FBgn0000043	-209
136	chrX	13319232	13319496	265	3.82839	31.3916	129	13321302	13329303	8002	1	FBgn0283680	FBtr0344170	-1806	32285	IP3K2	Inositol 1,4,5-triphosphate kinase 2	FBtr0346134;FBtr0346133;FBtr0344168;FBtr0344169	FBgn0283680;FBgn0283680;FBgn0283680;FBgn0283680	0;0;0;0
137	chr3L	18106051	18106350	300	3.90798	31.3479	156	18088417	18106149	17733	2	FBgn0036773	FBtr0075137	0	40000	CG13698	uncharacterized protein	FBtr0075137;FBtr0333698;FBtr0075121	FBgn0036773;FBgn0036773;FBgn0036774	0;0;-229
138	chr3L	4239421	4239997	577	3.3566	31.3032	391	4240173	4242603	2431	1	FBgn0035515	FBtr0073225	-176	38514	CG14997	uncharacterized protein	FBtr0073225;FBtr0073226;FBtr0346557	FBgn0035515;FBgn0035515;FBgn0267302	0;0;0
139	chrX	14831755	14832203	449	3.93208	31.0276	291	14826867	14832033	5167	2	FBgn0030581	FBtr0340466	0	32407	CG14408	uncharacterized protein	FBtr0340466;FBtr0073990;FBtr0305580;FBtr0339446;FBtr0339447;FBtr0300432;FBtr0300433;FBtr0073946;FBtr0073947	FBgn0030581;FBgn0030581;FBgn0030581;FBgn0030581;FBgn0030581;FBgn0030582;FBgn0030582;FBgn0030582;FBgn0030582	0;0;0;0;0;-444;-444;-444;-444
140	chrX	2141272	2141551	280	3.92176	30.6617	112	2141489	2144937	3449	1	FBgn0023507	FBtr0070381	0	31184	D2hgdh	D-2-hydroxyglutaric acid dehydrogenase	FBtr0070381;FBtr0070382	FBgn0023507;FBgn0023507	0;0
141	chr3R	23221834	23222185	352	3.81377	30.4616	173	23185580	23221961	36382	2	FBgn0262975	FBtr0306748	0	42743	cnc	cap-n-collar	FBtr0306748;FBtr0306753;FBtr0306754;FBtr0330372;FBtr0306752;FBtr0308226;FBtr0308227	FBgn0262975;FBgn0262975;FBgn0262975;FBgn0262975;FBgn0262975;FBgn0262975;FBgn0262975	0;0;0;0;0;0;0
142	chr2R	16135510	16135830	321	3.83358	30.3848	155	16138352	16141928	3577	1	FBgn0001124	FBtr0087231	-2522	36782	Got1	Glutamate oxaloacetate transaminase 1	FBtr0089593;FBtr0089589;FBtr0089590;FBtr0089591;FBtr0089592	FBgn0086676;FBgn0086676;FBgn0086676;FBgn0086676;FBgn0086676	0;0;0;0;0
143	chr2L	12694853	12695151	299	3.62615	30.3817	170	12693872	12694988	1117	2	FBgn0032446	FBtr0300273	0	34676	CG5780	uncharacterized protein	FBtr0300273;FBtr0080395;FBtr0340543	FBgn0032446;FBgn0032447;FBgn0032447	0;0;0
144	chr2R	6613515	6613820	306	3.75879	30.1961	135	6613768	6619382	5615	1	FBgn0086655	FBtr0301636	0	35555	jing	jing	FBtr0114365;FBtr0114364;FBtr0332950;FBtr0301636	FBgn0086655;FBgn0086655;FBgn0086655;FBgn0086655	0;0;0;0
145	chr2L	19817173	19817456	284	3.88406	30.0502	122	19816414	19816540	127	1	FBgn0043021	FBtr0081294	759	NA	NA	NA	FBtr0329838	FBgn0263873	0
146	chrX	658118	658387	270	3.88406	30.0502	139	657074	657899	826	1	FBgn0025637	FBtr0345314	1044	31016	SkpA	SKP1-related A	FBtr0070123;FBtr0070124;FBtr0070125;FBtr0070126;FBtr0070127;FBtr0100530;FBtr0070128;FBtr0070129;FBtr0345314	FBgn0025637;FBgn0025637;FBgn0025637;FBgn0025637;FBgn0025637;FBgn0025637;FBgn0025637;FBgn0025637;FBgn0025637	2004;2004;1762;1762;1762;1762;1445;1445;1044
147	chr3R	18917995	18918293	299	3.65625	29.6967	155	18918260	18926849	8590	1	FBgn0261113	FBtr0083701	0	42267	Xrp1	Xrp1	FBtr0083700;FBtr0083701;FBtr0083702;FBtr0113246;FBtr0334524	FBgn0261113;FBgn0261113;FBgn0261113;FBgn0261113;FBgn0261113	0;0;0;0;0
148	chr2L	21683653	21684002	350	3.32296	28.91	172	21684106	21720270	36165	1	FBgn0051619	FBtr0085902	-104	35424	nolo	no long nerve cord	FBtr0085902;FBtr0085901;FBtr0110959;FBtr0301000;FBtr0307497;FBtr0339131;FBtr0339132	FBgn0051619;FBgn0051619;FBgn0051619;FBgn0051619;FBgn0051619;FBgn0051619;FBgn0051619	-104;-104;-104;-104;-104;-104;-104
149	chr2L	9967151	9967441	291	3.80864	28.8397	156	9967313	9968491	1179	1	FBgn0011272	FBtr0079888	0	34329	RpL13	Ribosomal protein L13	FBtr0079888;FBtr0100164;FBtr0310482;FBtr0079889;FBtr0310483	FBgn0011272;FBgn0011272;FBgn0011272;FBgn0015664;FBgn0015664	0;0;0;0;0
150	chr2R	18523892	18524192	301	3.80864	28.8397	154	18527430	18535749	8320	1	FBgn0034356	FBtr0086699	-3238	37130	CG10924	uncharacterized protein	FBtr0304865;FBtr0304867	FBgn0262476;FBgn0262476	0;0
151	chrX	3285356	3285618	263	3.80864	28.8397	124	3289381	3343767	54387	1	FBgn0000479	FBtr0333313	-3763	31309	dnc	dunce	FBtr0070509;FBtr0333315;FBtr0333316;FBtr0333317;FBtr0070511;FBtr0070512;FBtr0070513;FBtr0070515;FBtr0070519;FBtr0333312	FBgn0000479;FBgn0000479;FBgn0000479;FBgn0000479;FBgn0000479;FBgn0000479;FBgn0000479;FBgn0000479;FBgn0000479;FBgn0000479	0;0;0;0;0;0;0;0;0;0
152	chr2L	20851599	20851916	318	3.77093	28.2408	179	20852578	20857113	4536	1	FBgn0032895	FBtr0081426	-662	35353	twit	target of wit	NA	NA	NA
153	chrX	9502400	9502664	265	3.77093	28.2408	142	9359850	9500129	140280	2	FBgn0261260	FBtr0302153	-2271	8674055	mgl	Megalin	FBtr0071374	FBgn0267253	48174
154	chr3L	21279840	21280314	475	3.25108	28.0678	205	21270722	21280243	9522	2	FBgn0012034	FBtr0078413	0	40348	AcCoAS	Acetyl Coenzyme A synthase	FBtr0078413;FBtr0333126;FBtr0078412	FBgn0012034;FBgn0012034;FBgn0027945	0;0;1192
155	chr2R	8572635	8572895	261	3.74483	28.0067	121	8570499	8572147	1649	1	FBgn0033304	FBtr0088690	2136	35837	Cyp6a13	Cyp6a13	FBtr0088690;FBtr0299788;FBtr0339346	FBgn0033304;FBgn0259226;FBgn0259226	2136;5596;11884
156	chr2L	7702556	7702796	241	3.73322	27.6462	120	7702805	7710690	7886	1	FBgn0041181	FBtr0079477	-9	34045	Tep3	Thioester-containing protein 3	FBtr0079477	FBgn0041181	-9
157	chr3R	13782139	13782426	288	3.73322	27.6462	123	13782288	13785676	3389	1	FBgn0000454	FBtr0082831	0	48450	Dip-B	Dipeptidase B	FBtr0082831;FBtr0082832;FBtr0082833;FBtr0345229;FBtr0082830	FBgn0000454;FBgn0000454;FBgn0000454;FBgn0000454;FBgn0038183	0;0;-214;-339;1175
158	chr2R	8434971	8435222	252	3.69551	27.0559	100	8435310	8436095	786	1	FBgn0002534	FBtr0333554	-88	35819	Lcp3	Larval cuticle protein 3	FBtr0333556;FBtr0088761;FBtr0333554;FBtr0088743	FBgn0002533;FBgn0002533;FBgn0002534;FBgn0002534	-186;-396;-88;-221
159	chr2R	22426833	22427213	381	3.69551	27.0559	188	22425733	22426977	1245	2	FBgn0034729	FBtr0071840	0	37565	CG10344	uncharacterized protein	FBtr0071840;FBtr0071841;FBtr0071830	FBgn0034729;FBgn0034729;FBgn0034730	0;0;-266
160	chr3L	21879336	21879745	410	3.69551	27.0559	177	21879577	21924114	44538	1	FBgn0262737	FBtr0301364	0	40436	mub	mushroom-body expressed	FBtr0304980;FBtr0304981;FBtr0304982;FBtr0333222;FBtr0301364;FBtr0304983;FBtr0304984;FBtr0332736;FBtr0078468;FBtr0078470;FBtr0111017;FBtr0346820	FBgn0262737;FBgn0262737;FBgn0262737;FBgn0262737;FBgn0262737;FBgn0262737;FBgn0262737;FBgn0262737;FBgn0262737;FBgn0262737;FBgn0262737;FBgn0262737	0;0;0;0;0;0;0;0;0;0;0;0
161	chr3L	22835132	22836057	926	3.69551	27.0559	409	22789233	22835194	45962	2	FBgn0027339	FBtr0078582	0	43924	jim	jim	FBtr0078582;FBtr0330076;FBtr0345874	FBgn0027339;FBgn0027339;FBgn0266977	0;0;1013
162	chr2R	13956884	13958283	1400	3.12951	27.0231	126	13943387	13958089	14703	2	FBgn0262739	FBtr0305592	0	36544	AGO1	Argonaute-1	FBtr0114495;FBtr0339958;FBtr0087611;FBtr0114494;FBtr0087610;FBtr0114493;FBtr0305592;FBtr0087612	FBgn0033886;FBgn0033886;FBgn0033886;FBgn0033886;FBgn0033886;FBgn0033886;FBgn0262739;FBgn0262739	1925;1925;2043;2043;2121;2121;0;0
163	chr2L	2009632	2009949	318	2.89565	26.9725	136	2009859	2030536	20678	1	FBgn0031384	FBtr0301068	0	33377	CG4238	uncharacterized protein	FBtr0301068;FBtr0330672;FBtr0077818;FBtr0077819	FBgn0031384;FBgn0031384;FBgn0051943;FBgn0051944	0;0;477;94
164	chr3L	3178409	3178707	299	2.66011	26.808	159	3172817	3178580	5764	2	FBgn0035410	FBtr0307018	0	38384	CG14964	uncharacterized protein	FBtr0307018;FBtr0073035;FBtr0073036;FBtr0332097;FBtr0332098;FBtr0332099	FBgn0035410;FBgn0283724;FBgn0283724;FBgn0283724;FBgn0283724;FBgn0283724	0;-223;-223;-223;-223;-223
165	chr3R	29215105	29215602	498	2.66011	26.808	158	29215585	29215684	100	1	FBgn0262448	FBtr0304462	0	NA	NA	NA	FBtr0085391;FBtr0303426;FBtr0303427;FBtr0304462	FBgn0051044;FBgn0051044;FBgn0051044;FBgn0262448	0;0;0;0
166	chr2L	20835534	20835852	319	3.6578	26.4701	162	20832849	20835840	2992	2	FBgn0032891	FBtr0290042	0	35349	Oseg5	Outer segment 5	FBtr0290042	FBgn0032891	0
167	chrX	16063454	16063692	239	3.6578	26.4701	104	16063738	16070304	6567	1	FBgn0030723	FBtr0074206	-46	32572	dpr18	defective proboscis extension response 18	FBtr0074206	FBgn0030723	-46
168	chr3L	5926634	5926995	362	3.28023	26.2543	148	5926871	5929902	3032	1	FBgn0053523	FBtr0091478	0	38668	CG33523	uncharacterized protein	FBtr0091475;FBtr0306383;FBtr0330119;FBtr0091478	FBgn0053523;FBgn0053523;FBgn0053523;FBgn0053523	0;0;0;0
169	chr2L	13332816	13333080	265	3.62009	25.8886	142	13307814	13331121	23308	2	FBgn0264308	FBtr0331504	-1695	34738	CG43778	uncharacterized protein	NA	NA	NA
170	chr3L	342911	343186	276	3.62009	25.8886	123	332801	342915	10115	2	FBgn0035132	FBtr0333904	0	38057	mthl10	methuselah-like 10	FBtr0072570;FBtr0072571;FBtr0306850;FBtr0333904;FBtr0072572;FBtr0306560;FBtr0306563	FBgn0023000;FBgn0023000;FBgn0023000;FBgn0035132;FBgn0035132;FBgn0261985;FBgn0261985	3771;3771;3771;0;0;0;0
171	chr2L	14851733	14851983	251	3.58238	25.3116	137	14844993	14851749	6757	2	FBgn0028886	FBtr0080685	0	34863	CG15279	uncharacterized protein	FBtr0080685;FBtr0300845	FBgn0028886;FBgn0028886	0;0
172	chr2R	10160013	10160299	287	3.58238	25.3116	135	10156390	10158931	2542	2	FBgn0265512	FBtr0088369	-1082	36072	mlt	mulet	FBtr0299833	FBgn0033494	0
173	chr2R	22217136	22217404	269	3.58238	25.3116	133	22217405	22218460	1056	2	FBgn0050278	FBtr0345468	1056	246523	CG30278	uncharacterized protein	FBtr0071774;FBtr0345469;FBtr0345468;FBtr0071780	FBgn0025186;FBgn0050278;FBgn0050278;FBgn0050278	0;0;1056;1096
174	chr3L	20730237	20730688	452	3.58238	25.3116	197	20730591	20744508	13918	1	FBgn0037016	FBtr0078245	0	40289	CG13252	uncharacterized protein	FBtr0078245	FBgn0037016	0
175	chr3R	30150624	30150891	268	3.58238	25.3116	110	30134856	30149606	14751	2	FBgn0039747	FBtr0334658	-1018	43583	AdoR	Adenosine receptor	NA	NA	NA
176	chr3R	19096232	19096947	716	3.37365	25.0138	502	19096961	19131929	34969	1	FBgn0038679	FBtr0083729	-14	42292	CG6040	uncharacterized protein	FBtr0083728;FBtr0083727;FBtr0346155;FBtr0083729	FBgn0016120;FBgn0016120;FBgn0016120;FBgn0038679	1232;1232;0;-14
177	chr2R	7245661	7245971	311	3.3483	24.9884	174	7243024	7245776	2753	2	FBgn0026602	FBtr0089050	0	44750	Ady43A	Ady43A	FBtr0089050	FBgn0026602	0
178	chr2L	8709507	8709774	268	3.19759	24.9385	111	8687226	8709611	22386	2	FBgn0004914	FBtr0336633	0	44544	Hnf4	Hepatocyte nuclear factor 4	FBtr0340231;FBtr0079746;FBtr0340232;FBtr0079745;FBtr0303868;FBtr0079747;FBtr0336633	FBgn0003209;FBgn0003209;FBgn0003209;FBgn0003209;FBgn0003209;FBgn0004914;FBgn0004914	4809;26023;26023;30886;30886;-465;0
179	chr2R	13171182	13171597	416	3.45962	24.9169	230	13171401	13174796	3396	1	FBgn0053138	FBtr0087732	0	326264	AGBE	1,4-Alpha-Glucan Branching Enzyme	FBtr0087732;FBtr0087729;FBtr0087731;FBtr0087730;FBtr0344928	FBgn0053138;FBgn0086532;FBgn0086532;FBgn0086532;FBgn0266635	0;2684;2684;2398;-437
180	chr2L	9657396	9657661	266	3.54467	24.7391	110	9656600	9657424	825	1	FBgn0053299	FBtr0303875	796	2768912	CG33299	uncharacterized protein	FBtr0300213;FBtr0303875	FBgn0053299;FBgn0053299	0;0
181	chr2R	17792416	17792849	434	3.54467	24.7391	178	17792870	17798128	5259	1	FBgn0028743	FBtr0301142	-21	37037	Dhit	Double hit	FBtr0301142;FBtr0340279;FBtr0089550	FBgn0028743;FBgn0028743;FBgn0028744	-21;-21;0
182	chr3L	18995730	18996074	345	3.45501	24.4108	195	18990026	18995809	5784	2	FBgn0036837	FBtr0075042	0	40073	CG18135	uncharacterized protein	FBtr0075042;FBtr0075043	FBgn0036837;FBgn0036837	0;0
183	chr2R	11890880	11891165	286	2.88901	24.3822	134	11887568	11890979	3412	2	FBgn0033663	FBtr0088058	0	36270	ERp60	ERp60	FBtr0088058;FBtr0345023;FBtr0331927	FBgn0033663;FBgn0284245;FBgn0284245	0;0;-231
184	chr2L	12207632	12207866	235	3.50696	24.1711	116	12207709	12210008	2300	1	FBgn0051759	FBtr0290240	0	326158	CG31759	uncharacterized protein	FBtr0331998;FBtr0331648;FBtr0331646;FBtr0080344;FBtr0290240;FBtr0290239	FBgn0000114;FBgn0000114;FBgn0000114;FBgn0000114;FBgn0051759;FBgn0051759	0;0;0;0;0;-53
185	chr2R	14769302	14769597	296	3.46745	24.0578	149	14759646	14769423	9778	2	FBgn0020767	FBtr0329880	0	36643	Spred	Sprouty-related protein with EVH-1 domain	FBtr0329880;FBtr0087468;FBtr0329879;FBtr0347230;FBtr0347231;FBtr0347232	FBgn0020767;FBgn0020767;FBgn0020767;FBgn0259112;FBgn0259112;FBgn0259112	0;0;0;673;1293;1698
186	chr3L	18996470	18996852	383	3.40855	23.9876	165	18990026	18995809	5784	2	FBgn0036837	FBtr0075042	-661	40073	CG18135	uncharacterized protein	FBtr0075043	FBgn0036837	0
187	chr3R	18659412	18659766	355	3.0379	23.9667	160	18659618	18661126	1509	1	FBgn0027841	FBtr0083660	0	42239	CstF64	Cleavage stimulation factor 64 kD subunit	FBtr0083660;FBtr0083691;FBtr0344326;FBtr0344327	FBgn0027841;FBgn0051224;FBgn0051224;FBgn0051224	0;-103;-103;-103
188	chr3L	1969858	1970243	386	3.13131	23.6149	241	1966725	1970079	3355	2	FBgn0027547	FBtr0072853	0	38262	CG1927	uncharacterized protein	FBtr0072853;FBtr0072852	FBgn0027547;FBgn0035299	0;0
189	chr2L	4661000	4661234	235	3.46925	23.6078	115	4655478	4656209	732	2	FBgn0284415	FBtr0452182	-4791	NA	NA	NA	NA	NA	NA
190	chr3R	4378753	4379022	270	3.46925	23.6078	108	4378925	4381210	2286	1	FBgn0037239	FBtr0078915	0	40552	Sfxn1-3	Sideroflexin 1/3	FBtr0078913;FBtr0078914;FBtr0078915;FBtr0078916	FBgn0037239;FBgn0037239;FBgn0037239;FBgn0037239	0;0;0;-285
191	chr3L	3942321	3942609	289	3.21264	23.2149	151	3941008	3942465	1458	2	FBgn0027552	FBtr0073171	0	38463	CG10863	uncharacterized protein	FBtr0073171;FBtr0333134;FBtr0073163	FBgn0027552;FBgn0035477;FBgn0035477	0;0;0
192	chr3R	14729013	14729293	281	2.75445	23.1217	129	14724760	14729078	4319	2	FBgn0038256	FBtr0333277	0	41784	CG7530	uncharacterized protein	FBtr0333277;FBtr0083021;FBtr0083019;FBtr0083020	FBgn0038256;FBgn0038256;FBgn0038256;FBgn0038256	0;0;0;0
193	chr2L	1657197	1657472	276	3.17612	23.0579	119	1651258	1704682	53425	1	FBgn0086758	FBtr0307047	5939	33343	chinmo	Chronologically inappropriate morphogenesis	FBtr0077877;FBtr0303933;FBtr0303935;FBtr0307047	FBgn0086758;FBgn0086758;FBgn0086758;FBgn0086758	0;0;0;0
194	chr2L	7436879	7437128	250	3.43154	23.0491	139	7437492	7445269	7778	1	FBgn0031914	FBtr0079446	-364	34023	CG5973	uncharacterized protein	FBtr0079446;FBtr0332530	FBgn0031914;FBgn0031914	0;0
195	chr3L	6688987	6689244	258	3.43154	23.0491	135	6689327	6692654	3328	2	FBgn0035710	FBtr0076961	3410	38744	SP1173	SP1173	FBtr0076961;FBtr0076958;FBtr0076959;FBtr0076960	FBgn0035710;FBgn0035710;FBgn0035710;FBgn0035710	3410;14277;14277;14277
196	chr2R	11222615	11222898	284	3.36013	22.6502	150	11222871	11226746	3876	1	FBgn0033584	FBtr0088105	0	36174	CG7737	uncharacterized protein	FBtr0088105;FBtr0088102;FBtr0088104	FBgn0033584;FBgn0037084;FBgn0037084	0;2681;2681
197	chr2R	7735946	7736194	249	3.29481	22.5031	114	7718446	7735622	17177	2	FBgn0042135	FBtr0330328	-324	59173	CG18812	uncharacterized protein	FBtr0088935;FBtr0330328	FBgn0042135;FBgn0042135	0;0
198	chr3R	29479130	29479455	326	3.39383	22.4951	157	29479316	29487131	7816	1	FBgn0004369	FBtr0303454	0	43469	Ptp99A	Protein tyrosine phosphatase 99A	FBtr0303148;FBtr0085422;FBtr0085424;FBtr0085423;FBtr0303454	FBgn0004369;FBgn0004369;FBgn0004369;FBgn0004369;FBgn0004369	0;0;0;0;0
199	chrX	1399774	1400032	259	3.39383	22.4951	129	1393054	1397337	4284	1	FBgn0024985	FBtr0332292	6720	31090	CG11448	uncharacterized protein	NA	NA	NA
200	chrX	14953932	14954197	266	3.39383	22.4951	150	14952345	14953697	1353	2	FBgn0266094	FBtr0343516	-235	NA	NA	NA	FBtr0343521;FBtr0303295;FBtr0343516	FBgn0027601;FBgn0030599;FBgn0266094	-400;0;-235
201	chrX	12709957	12710196	240	3.22415	22.4861	95	12705854	12708841	2988	1	FBgn0030417	FBtr0073685	4103	32224	CG15725	uncharacterized protein	FBtr0333767;FBtr0333768;FBtr0333766;FBtr0333765	FBgn0265523;FBgn0265523;FBgn0265523;FBgn0265523	0;0;0;0
202	chrX	19851766	19852287	522	2.68501	22.0223	281	19852214	19859379	7166	1	FBgn0031078	FBtr0074798	0	33002	Nup205	Nucleoporin 205kD	FBtr0074798;FBtr0074799;FBtr0074804	FBgn0031078;FBgn0031078;FBgn0261811	0;0;0
203	chrY	942295	942849	555	1.95862	21.9634	418	941169	942020	852	1	FBgn0259859	FBtr0300156	1126	NA	NA	NA	FBtr0300156	FBgn0259859	1126
204	chr2L	10774134	10774374	241	3.35613	21.9459	115	10770931	10771370	440	1	FBgn0032299	FBtr0080136	3203	34489	CG17127	uncharacterized protein	FBtr0080189;FBtr0290245;FBtr0290246	FBgn0051869;FBgn0051869;FBgn0051869	0;0;0
205	chr3L	8058596	8058892	297	3.35613	21.9459	176	8054333	8058713	4381	2	FBgn0026263	FBtr0076745	0	38891	bip1	bip1	FBtr0076745	FBgn0026263	0
206	chr3L	18743697	18744051	355	3.35613	21.9459	233	18744488	18745699	1212	1	FBgn0036810	FBtr0075053	-437	40041	CG6885	uncharacterized protein	FBtr0075053	FBgn0036810	-437
207	chr3L	4440270	4440538	269	3.27913	21.928	114	4436721	4438311	1591	1	FBgn0035544	FBtr0073301	3549	38546	CG15021	uncharacterized protein	NA	NA	NA
208	chr2L	5365939	5366234	296	3.31842	21.4014	157	5379095	5381074	1980	2	FBgn0262097	FBtr0342943	14840	NA	NA	NA	FBtr0300012;FBtr0343224;FBtr0347408;FBtr0347409	FBgn0016920;FBgn0016920;FBgn0016920;FBgn0016920	19739;19739;19739;19739
209	chr2L	18119580	18120011	432	3.31842	21.4014	142	18119995	18129862	9868	1	FBgn0032666	FBtr0081035	0	35083	CG5758	uncharacterized protein	FBtr0081035;FBtr0340576;FBtr0340577	FBgn0032666;FBgn0032666;FBgn0032666	0;0;-119
210	chr3R	7265644	7265883	240	3.31842	21.4014	155	7252063	7265703	13641	2	FBgn0001112	FBtr0081596	0	40875	Gld	Glucose dehydrogenase	FBtr0081596;FBtr0472596;FBtr0081578	FBgn0001112;FBgn0001112;FBgn0028400	0;0;-182
211	chr3R	29907712	29907981	270	3.31842	21.4014	152	29908107	29912892	4786	1	FBgn0051036	FBtr0085501	-126	43539	CG31036	uncharacterized protein	FBtr0085501;FBtr0345059	FBgn0051036;FBgn0051036	-126;-126
212	chr3L	17841070	17841473	404	3.28957	21.3711	93	17838650	17841427	2778	2	FBgn0036759	FBtr0347063	0	39985	CG5577	uncharacterized protein	FBtr0347063;FBtr0075162;FBtr0075161;FBtr0345052	FBgn0036759;FBgn0036759;FBgn0036760;FBgn0266685	0;0;2071;-198
213	chr3R	12121278	12121489	212	3.28071	20.8619	133	12121583	12128201	6619	2	FBgn0037992	FBtr0082550	6712	41472	CG4702	uncharacterized protein	FBtr0082550;FBtr0308292;FBtr0308293;FBtr0308294	FBgn0037992;FBgn0037992;FBgn0037992;FBgn0037992	6712;6712;6712;6712
214	chrY	2832084	2832322	239	3.28071	20.8619	105	3022289	3024024	1736	1	FBgn0265047	FBtr0302230	-189967	NA	NA	NA	NA	NA	NA
215	chr2R	18528659	18528977	319	3.04609	20.7656	123	18527430	18535749	8320	1	FBgn0034356	FBtr0086699	1229	37130	CG10924	uncharacterized protein	FBtr0086699	FBgn0034356	0
216	chr3R	9014133	9014686	554	2.91166	20.5184	134	9010282	9014222	3941	2	FBgn0037655	FBtr0300747	0	41082	Kcmf1	Potassium channel modulatory factor 1	FBtr0300745;FBtr0300748;FBtr0300747;FBtr0300744;FBtr0300746;FBtr0300743;FBtr0082006	FBgn0037655;FBgn0037655;FBgn0037655;FBgn0037655;FBgn0037655;FBgn0037655;FBgn0040534	-490;-101;0;0;0;0;655
217	chr2R	7793056	7793353	298	3.02042	20.5134	163	7791901	7793230	1330	2	FBgn0001091	FBtr0100479	0	35728	Gapdh1	Glyceraldehyde 3 phosphate dehydrogenase 1	FBtr0100479;FBtr0088903;FBtr0088831	FBgn0001091;FBgn0001091;FBgn0002891	0;0;-272
218	chr3R	10089414	10089816	403	2.70162	20.3305	120	10091126	10091217	92	1	FBgn0262378	FBtr0304217	-1310	NA	NA	NA	FBtr0344594	FBgn0266414	0
219	chr3L	12653070	12653410	341	3.243	20.3272	155	12648907	12653090	4184	2	FBgn0263379	FBtr0309061	0	NA	NA	NA	FBtr0309061	FBgn0263379	0
220	chr3R	6768303	6768547	245	3.243	20.3272	145	6767050	6779728	12679	1	FBgn0261638	FBtr0303008	1253	NA	NA	NA	FBtr0309069;FBtr0303008	FBgn0261638;FBgn0261638	0;0
221	chr3R	26137155	26137422	268	3.243	20.3272	113	26133154	26137148	3995	1	FBgn0039415	FBtr0084987	4001	43178	CG6142	uncharacterized protein	FBtr0084987	FBgn0039415	4001
222	chr2R	13822103	13822441	339	3.15698	20.2069	140	13819624	13824553	4930	2	FBgn0000662	FBtr0087647	2112	36527	fl(2)d	female lethal d	FBtr0087647;FBtr0087648;FBtr0304696;FBtr0304697	FBgn0000662;FBgn0000662;FBgn0000662;FBgn0000662	0;0;0;0
223	chr3L	4840617	4840904	288	3.10858	20.1756	134	4837791	4840108	2318	2	FBgn0035578	FBtr0306799	-509	38583	CG13707	uncharacterized protein	NA	NA	NA
224	chr4	557674	558128	455	3.0857	20.164	224	558016	565931	7916	1	FBgn0022361	FBtr0089995	0	43797	Pur-alpha	Purine-rich binding protein-alpha	FBtr0089995;FBtr0089996;FBtr0089994;FBtr0310639;FBtr0089993;FBtr0310640;FBtr0345197;FBtr0333706;FBtr0089106;FBtr0333707	FBgn0022361;FBgn0022361;FBgn0022361;FBgn0022361;FBgn0022361;FBgn0022361;FBgn0026869;FBgn0026869;FBgn0026869;FBgn0264618	0;0;-95;-95;-95;-95;0;0;0;0
225	chr3R	11196852	11197124	273	3.09428	20.0448	124	11197592	11208633	11042	1	FBgn0261808	FBtr0335218	-468	41339	cu	curled	FBtr0082341;FBtr0335218	FBgn0037870;FBgn0261808	0;-468
226	chr3L	17603768	17604081	314	2.9006	20.0414	132	17560158	17619325	59168	2	FBgn0000567	FBtr0075202	15244	39962	Eip74EF	Ecdysone-induced protein 74EF	FBtr0075202;FBtr0075203;FBtr0305796	FBgn0000567;FBgn0000567;FBgn0000567	0;0;0
227	chr3R	5632140	5632473	334	3.15175	19.9564	148	5632192	5633321	1130	1	FBgn0051549	FBtr0078707	0	40689	CG31549	uncharacterized protein	FBtr0078707;FBtr0335215;FBtr0078706	FBgn0051549;FBgn0051549;FBgn0051551	0;0;4288
228	chr3L	2554527	2554778	252	2.75391	19.6495	143	2508047	2554292	46246	2	FBgn0010905	FBtr0345047	-235	46194	Spn	Spinophilin	FBtr0304614;FBtr0304620;FBtr0304613;FBtr0304615;FBtr0304616;FBtr0304617;FBtr0304618;FBtr0304621;FBtr0345046;FBtr0345047;FBtr0072956;FBtr0072957;FBtr0072958;FBtr0333365	FBgn0010905;FBgn0010905;FBgn0010905;FBgn0010905;FBgn0010905;FBgn0010905;FBgn0010905;FBgn0010905;FBgn0010905;FBgn0010905;FBgn0010909;FBgn0010909;FBgn0010909;FBgn0010909	0;0;0;0;0;0;0;0;0;0;31762;31762;31762;31762
229	chr3L	4122291	4122562	272	2.99556	19.5116	135	4114289	4122388	8100	2	FBgn0035499	FBtr0073270	0	38490	Chd64	Chd64	FBtr0073270;FBtr0345589	FBgn0035499;FBgn0264693	0;11988
230	chrX	19496891	19497139	249	3.16758	19.2728	139	19496675	19509350	12676	1	FBgn0027621	FBtr0307192	216	32938	Pfrx	6-phosphofructo-2-kinase	FBtr0074713;FBtr0074714;FBtr0074715;FBtr0307192;FBtr0074721	FBgn0027621;FBgn0027621;FBgn0027621;FBgn0027621;FBgn0031023	0;0;0;0;0
231	chr2R	12955813	12956090	278	3.08921	18.8091	146	12953553	12955170	1618	1	FBgn0033787	FBtr0087792	2260	36430	CG13321	uncharacterized protein	FBtr0345371	FBgn0033787	2701
232	chr2R	22596440	22596650	211	3.12987	18.7532	111	22596486	22597125	640	2	FBgn0266867	FBtr0345701	475	NA	NA	NA	FBtr0071853;FBtr0345701	FBgn0034739;FBgn0266867	1763;0
233	chrX	4667069	4667285	217	3.12987	18.7532	128	4658577	4666700	8124	2	FBgn0029720	FBtr0300468	-369	31402	CG3009	uncharacterized protein	FBtr0070688;FBtr0332316;FBtr0300468;FBtr0070687;FBtr0070686	FBgn0029720;FBgn0029720;FBgn0029720;FBgn0262699;FBgn0262699	-369;-369;-369;10248;12252
234	chrX	9687829	9688043	215	3.12987	18.7532	86	9688189	9689295	1107	1	FBgn0261522	FBtr0344595	-146	NA	NA	NA	FBtr0344595	FBgn0261522	-146
235	chr3L	19140138	19140615	478	2.83522	18.4888	350	19106843	19138975	32133	2	FBgn0036851	FBtr0330092	-1163	40088	CG14082	uncharacterized protein	FBtr0332735	FBgn0016797	30033
236	chr2R	11388641	11388902	262	3.02156	18.4161	129	11387160	11388779	1620	2	FBgn0050022	FBtr0289990	0	36233	CG30022	uncharacterized protein	FBtr0289990;FBtr0088146	FBgn0050022;FBgn0082585	0;0
237	chr3L	11623667	11623874	208	3.09216	18.2387	92	11620535	11623715	3181	2	FBgn0086254	FBtr0076139	0	39304	CG6084	uncharacterized protein	FBtr0076139;FBtr0331547;FBtr0076138;FBtr0331546	FBgn0086254;FBgn0086254;FBgn0086254;FBgn0086254	0;0;0;0
238	chrY	3504655	3507547	2893	1.68607	18.0771	2025	3539437	3540722	1286	2	FBgn0046698	FBtr0346673	33175	3355173	Pp1-Y2	Protein phosphatase 1, Y-linked 2	NA	NA	NA
239	chr3L	16896475	16896749	275	3.07076	18.0607	145	16899415	16907156	7742	1	FBgn0261565	FBtr0302786	-2666	39889	Lmpt	Limpet	FBtr0302779;FBtr0302781;FBtr0306704;FBtr0332703;FBtr0302780;FBtr0302782	FBgn0261565;FBgn0261565;FBgn0261565;FBgn0261565;FBgn0261565;FBgn0261565	0;0;0;0;0;0
240	chr3R	29682384	29682663	280	2.69986	17.7539	118	29682503	29685758	3256	1	FBgn0013972	FBtr0085453	0	43493	Gycalpha99B	Guanylyl cyclase alpha-subunit at 99B	FBtr0085453;FBtr0085464;FBtr0308238	FBgn0013972;FBgn0039681;FBgn0039681	0;-343;-106
241	chr2L	552411	552759	349	3.05445	17.7295	189	544925	552454	7530	2	FBgn0005660	FBtr0344014	0	33229	Ets21C	Ets at 21C	FBtr0344014;FBtr0078079;FBtr0345429	FBgn0005660;FBgn0005660;FBgn0005660	0;0;0
242	chr2L	3059314	3059605	292	3.05445	17.7295	150	3056989	3068177	11189	1	FBgn0283427	FBtr0335387	2325	33524	FASN1	Fatty acid synthase 1	FBtr0077659;FBtr0335387	FBgn0283427;FBgn0283427	0;0
243	chr2L	9090007	9090227	221	3.05445	17.7295	138	9084107	9089440	5334	1	FBgn0032095	FBtr0079768	5900	34235	Toll-4	Toll-4	NA	NA	NA
244	chrX	1560131	1560343	213	3.05445	17.7295	120	1558349	1558400	52	2	FBgn0065095	FBtr0091687	-1731	NA	NA	NA	FBtr0303587;FBtr0070284;FBtr0343517	FBgn0025390;FBgn0025390;FBgn0025390	0;0;0
245	chr2R	18397899	18398103	205	2.59759	17.7001	117	18398393	18399223	831	1	FBgn0034335	FBtr0086669	-290	37106	GstE1	Glutathione S transferase E1	FBtr0086669;FBtr0086726;FBtr0344195	FBgn0034335;FBgn0063499;FBgn0063499	-290;-373;0
246	chr2L	7029104	7029348	245	2.89893	17.6874	131	7027526	7028959	1434	1	FBgn0031881	FBtr0079389	1578	33987	MME1	Mitochondrial Magnesium Exporter 1	FBtr0079389	FBgn0031881	1578
247	chr3L	18800078	18800905	828	3.03332	17.5545	224	18751749	18801309	49561	2	FBgn0001078	FBtr0075086	404	40045	ftz-f1	ftz transcription factor 1	FBtr0075086;FBtr0347047	FBgn0001078;FBgn0267601	0;0
248	chr3L	311523	311949	427	3.01674	17.2254	233	306226	311642	5417	2	FBgn0004373	FBtr0072517	0	45374	fwd	four wheel drive	FBtr0072516;FBtr0072517;FBtr0072515;FBtr0332841	FBgn0004373;FBgn0004373;FBgn0004373;FBgn0004373	0;0;0;0
249	chr3R	27656977	27657245	269	3.01674	17.2254	123	27640643	27656996	16354	2	FBgn0266579	FBtr0344742	0	326116	tau	tau	FBtr0344131;FBtr0085195;FBtr0085196;FBtr0344745;FBtr0344747;FBtr0344748;FBtr0344741;FBtr0344743;FBtr0344749;FBtr0344752;FBtr0347394;FBtr0344742;FBtr0344744	FBgn0002772;FBgn0002772;FBgn0002772;FBgn0266579;FBgn0266579;FBgn0266579;FBgn0266579;FBgn0266579;FBgn0266579;FBgn0266579;FBgn0266579;FBgn0266579;FBgn0266579	0;2932;2932;-163;-163;-163;-163;-163;-163;-163;-163;0;-182
250	chrX	3570272	3570534	263	3.01674	17.2254	149	3569504	3572000	2497	1	FBgn0052792	FBtr0307180	768	318213	ppk8	pickpocket 8	FBtr0333794;FBtr0307179;FBtr0307180	FBgn0052791;FBgn0052792;FBgn0052792	0;0;0
251	chr3L	24440326	24440604	279	1.78579	17.0233	88	24534090	24535468	1379	1	FBgn0040045	FBtr0307117	-93486	NA	NA	NA	NA	NA	NA
252	chr2R	18834629	18834884	256	2.53665	16.8504	175	18833372	18834775	1404	2	FBgn0034398	FBtr0086629	0	37174	CG15098	uncharacterized protein	FBtr0086629;FBtr0086618	FBgn0034398;FBgn0034399	0;-379
253	chr2R	18857791	18858134	344	2.37004	16.7865	136	18855767	18857940	2174	2	FBgn0034405	FBtr0089970	0	37181	Jheh2	Juvenile hormone epoxide hydrolase 2	FBtr0089970;FBtr0345981	FBgn0034405;FBgn0034405	0;0
254	chr2L	4331872	4332123	252	2.97903	16.7268	154	4333913	4345411	11499	1	FBgn0020762	FBtr0077426	-1790	33636	Atet	ABC transporter expressed in trachea	FBtr0077425	FBgn0028482	7318
255	chr3L	11135879	11136110	232	2.97903	16.7268	93	11136049	11163984	27936	1	FBgn0052082	FBtr0076216	0	39258	IRSp53	Insulin receptor substrate 53 kDa	FBtr0302875;FBtr0076216;FBtr0113422;FBtr0334096;FBtr0344833	FBgn0036138;FBgn0052082;FBgn0052082;FBgn0052082;FBgn0052082	892;0;0;0;0
256	chr3L	18460419	18460739	321	2.97903	16.7268	104	18459464	18461024	1561	2	FBgn0052196	FBtr0273401	285	317908	CG32196	uncharacterized protein	FBtr0273401;FBtr0332868	FBgn0052196;FBgn0052196	0;0
257	chr3R	26714062	26714489	428	2.97903	16.7268	188	26697697	26714159	16463	2	FBgn0023179	FBtr0085048	0	43215	amon	amontillado	FBtr0085048	FBgn0023179	0
258	chr3R	15131840	15132103	264	2.48381	16.6505	174	15095957	15131926	35970	2	FBgn0261859	FBtr0303485	0	41817	CG42788	uncharacterized protein	FBtr0303485;FBtr0303486	FBgn0261859;FBgn0261859	0;0
259	chr2L	5341069	5341297	229	2.74465	16.5858	99	5339132	5342234	3103	2	FBgn0031703	FBtr0079077	937	33766	CG12512	uncharacterized protein	FBtr0079077	FBgn0031703	0
260	chr3L	17907681	17908002	322	2.87516	16.5814	147	17898889	17907812	8924	2	FBgn0036770	FBtr0075153	0	39996	Prestin	prestin	FBtr0075153;FBtr0075144	FBgn0036770;FBgn0036771	0;-141
261	chr2R	1943103	1944123	1021	1.69553	16.5459	614	1806864	1807342	479	2	FBgn0085784	FBtr0114236	-135761	NA	NA	NA	FBtr0300103	FBgn0263780	0
262	chr2L	21508360	21508975	616	1.92348	16.3781	348	21508705	21508740	36	1	FBgn0053740	FBtr0091738	0	NA	NA	NA	FBtr0091738;FBtr0091851;FBtr0091883;FBtr0091884	FBgn0053740;FBgn0053847;FBgn0053879;FBgn0053880	0;0;859;0
263	chr3L	4805806	4806040	235	2.78953	16.3385	142	4803077	4805274	2198	2	FBgn0035575	FBtr0073362	-532	38579	CG7509	uncharacterized protein	FBtr0073361	FBgn0042131	1366
264	chr3R	26461300	26461614	315	2.90749	16.3196	188	26461527	26470008	8482	1	FBgn0039430	FBtr0085015	0	43196	CG5455	uncharacterized protein	FBtr0085014;FBtr0085015	FBgn0039429;FBgn0039430	3051;0
265	chrX	3419137	3420392	1256	1.66502	16.3157	631	3427452	3427523	72	2	FBgn0052493	FBtr0070533	7131	NA	NA	NA	FBtr0344078;FBtr0332303;FBtr0332304;FBtr0070534;FBtr0332302;FBtr0344076	FBgn0029657;FBgn0029657;FBgn0029657;FBgn0029657;FBgn0029657;FBgn0266350	0;0;0;0;0;0
266	chr2R	14605267	14605527	261	2.92875	16.3141	102	14604549	14605297	749	2	FBgn0033945	FBtr0301735	0	36620	CG12868	uncharacterized protein	FBtr0301735;FBtr0087504;FBtr0339979	FBgn0033945;FBgn0053469;FBgn0053469	0;775;775
267	chr3R	4821311	4821619	309	2.94132	16.2335	228	4817980	4821432	3453	2	FBgn0037282	FBtr0334900	0	40602	CG14657	uncharacterized protein	FBtr0334900;FBtr0334901;FBtr0078875	FBgn0037282;FBgn0037282;FBgn0037282	0;0;0
268	chr3R	26988720	26988970	251	2.94132	16.2335	161	26985624	26988517	2894	2	FBgn0051075	FBtr0085080	-203	43244	CG31075	uncharacterized protein	FBtr0085080;FBtr0307505	FBgn0051075;FBgn0051076	-203;882
269	chr3L	24441234	24441668	435	1.6721	16.0552	141	24534090	24535468	1379	1	FBgn0040045	FBtr0307117	-92422	NA	NA	NA	NA	NA	NA
270	chr3L	21483903	21484166	264	2.54638	15.9541	154	21484891	21490586	5696	2	FBgn0037085	FBtr0332718	6420	40375	Neu2	Neuroectoderm-expressed 2	NA	NA	NA
271	chr2R	9564967	9565416	450	2.69477	15.7869	276	9559255	9565046	5792	2	FBgn0266819	FBtr0345574	0	NA	NA	NA	FBtr0345574;FBtr0345573	FBgn0266819;FBgn0266819	0;0
272	chr2L	17589911	17590178	268	2.90361	15.7456	115	17590140	17591267	1128	1	FBgn0032651	FBtr0303253	0	35066	Oli	Olig family	FBtr0344781;FBtr0080986;FBtr0303252;FBtr0303253;FBtr0340255	FBgn0032651;FBgn0032651;FBgn0032651;FBgn0032651;FBgn0265583	0;0;0;0;-211
273	chr2R	9409323	9409689	367	2.90361	15.7456	152	9400531	9409492	8962	2	FBgn0016078	FBtr0088553	0	35966	wun	wunen	FBtr0088553;FBtr0088552;FBtr0306111	FBgn0016078;FBgn0016078;FBgn0016078	0;0;0
274	chr3L	6942685	6942903	219	2.90361	15.7456	79	6942856	6948662	5807	1	FBgn0035719	FBtr0333079	0	38755	tow	target of wingless	FBtr0333079;FBtr0333077;FBtr0333078;FBtr0333080	FBgn0035719;FBgn0035719;FBgn0035719;FBgn0035719	0;0;0;0
275	chrX	945741	945990	250	2.90361	15.7456	135	942474	945773	3300	2	FBgn0040348	FBtr0070187	0	31045	CG3703	uncharacterized protein	FBtr0070187	FBgn0040348	0
276	chr2R	6349683	6351433	1751	1.62925	15.7289	841	6245512	6255266	9755	1	FBgn0033075	FBtr0336520	104171	35554	Pld	Phospholipase D	NA	NA	NA
277	chr3L	22824739	22825190	452	2.78825	15.6509	222	22789233	22824835	35603	2	FBgn0027339	FBtr0304985	0	43924	jim	jim	FBtr0304985;FBtr0078582;FBtr0333211;FBtr0333212;FBtr0333213;FBtr0330076	FBgn0027339;FBgn0027339;FBgn0027339;FBgn0027339;FBgn0027339;FBgn0027339	0;0;0;0;0;0
278	chr3L	19294613	19295146	534	2.61342	15.4663	392	19294767	19298830	4064	1	FBgn0028380	FBtr0290284	0	43927	fal	falten	FBtr0347258;FBtr0290284;FBtr0321324;FBtr0347254	FBgn0028380;FBgn0028380;FBgn0028380;FBgn0267715	0;0;0;0
279	chrX	23212721	23212971	251	1.67785	15.4385	188	23213889	23214011	123	1	FBgn0267517	FBtr0346893	-918	NA	NA	NA	FBtr0346892	FBgn0085813	0
280	chr2R	18576675	18578120	1446	1.66313	15.4297	604	18554119	18583317	29199	2	FBgn0050115	FBtr0340387	5197	37134	GEFmeso	Guanine nucleotide exchange factor in mesoderm	FBtr0340387;FBtr0300421;FBtr0310055	FBgn0050115;FBgn0050115;FBgn0050115	0;0;0
281	chr2R	3766927	3767497	571	2.1656	15.3632	480	3647346	3647765	420	1	FBgn0085512	FBtr0310523	119581	5740597	RYa	RYamide	NA	NA	NA
282	chr2L	1006619	1006820	202	2.8659	15.2633	153	987807	991300	3494	2	FBgn0266036	FBtr0445830	-15319	NA	NA	NA	NA	NA	NA
283	chr3L	14622423	14622628	206	2.8659	15.2633	70	14622796	14627983	5188	1	FBgn0036433	FBtr0301239	-168	39593	CG9628	uncharacterized protein	FBtr0075676;FBtr0333031;FBtr0301239;FBtr0075677;FBtr0075678	FBgn0003388;FBgn0003388;FBgn0036433;FBgn0036433;FBgn0036433	7965;7965;-168;-168;-168
284	chrX	14850219	14850433	215	2.8659	15.2633	92	14846472	14848808	2337	2	FBgn0030587	FBtr0073986	-1411	32413	CG9522	uncharacterized protein	FBtr0330214;FBtr0073949;FBtr0073950;FBtr0073951;FBtr0073952;FBtr0330217;FBtr0330215;FBtr0330216	FBgn0264078;FBgn0264078;FBgn0264078;FBgn0264078;FBgn0264078;FBgn0264078;FBgn0264078;FBgn0264078	0;0;0;0;0;0;0;0
285	chr3R	2952290	2953578	1289	1.60869	15.2054	926	2744305	2744800	496	2	FBgn0266747	FBtr0345281	-207490	NA	NA	NA	FBtr0445191	FBgn0267430	0
286	chr2L	129137	129411	275	2.39332	15.1794	112	122624	129245	6622	2	FBgn0025683	FBtr0078154	0	33171	CG3164	uncharacterized protein	FBtr0078154;FBtr0100379;FBtr0078153;FBtr0078155;FBtr0306542;FBtr0330638;FBtr0330639	FBgn0025683;FBgn0025683;FBgn0025683;FBgn0025683;FBgn0031228;FBgn0031228;FBgn0031228	0;0;0;0;0;0;0
287	chr3R	19671415	19672026	612	2.58331	15.1681	333	19671450	19698550	27101	1	FBgn0051216	FBtr0083786	0	42348	Naam	Nicotinamide amidase	FBtr0083799;FBtr0083786	FBgn0012003;FBgn0051216	323;0
288	chr2R	6347518	6349090	1573	1.57768	14.829	212	6245512	6255266	9755	1	FBgn0033075	FBtr0336520	102006	35554	Pld	Phospholipase D	NA	NA	NA
289	chr3R	9053037	9053338	302	2.67345	14.7979	144	9053291	9063245	9955	1	FBgn0037659	FBtr0336759	0	41090	Kdm2	Lysine (K)-specific demethylase 2	FBtr0300691;FBtr0336758;FBtr0336759;FBtr0336760	FBgn0037659;FBgn0037659;FBgn0037659;FBgn0037659	0;0;0;0
290	chr2R	22373267	22373538	272	2.62266	14.7968	153	22337584	22373109	35526	2	FBgn0034720	FBtr0113107	-158	37552	Liprin-gamma	Liprin-gamma	FBtr0071846;FBtr0342990;FBtr0113107;FBtr0342997;FBtr0342998	FBgn0034720;FBgn0034720;FBgn0034720;FBgn0265980;FBgn0265980	-158;-158;-158;1428;1428
291	chr2L	3449596	3449851	256	2.8282	14.7866	102	3449683	3452106	2424	1	FBgn0031534	FBtr0077517	0	33560	Snx1	Sorting nexin 1	FBtr0077517;FBtr0343238	FBgn0031534;FBgn0031534	0;0
292	chr2L	7437288	7437505	218	2.8282	14.7866	78	7437492	7445269	7778	1	FBgn0031914	FBtr0079446	0	34023	CG5973	uncharacterized protein	FBtr0079446;FBtr0332530	FBgn0031914;FBgn0031914	0;0
293	chr2L	9342039	9342238	200	2.8282	14.7866	112	9342832	9344491	1660	1	FBgn0032110	FBtr0079803	-594	34252	CG3748	uncharacterized protein	FBtr0079800;FBtr0079801;FBtr0303876;FBtr0079802	FBgn0026439;FBgn0026439;FBgn0026439;FBgn0026439	8472;8472;8472;4233
294	chr2R	8518940	8519141	202	2.8282	14.7866	105	8473956	8532294	58339	2	FBgn0050361	FBtr0273325	13153	35832	mtt	mangetout	FBtr0273325;FBtr0273326;FBtr0330608	FBgn0050361;FBgn0050361;FBgn0050361	0;0;0
295	chr2R	10110729	10110957	229	2.8282	14.7866	134	10110870	10117137	6268	1	FBgn0003071	FBtr0088421	0	36060	Pfk	Phosphofructokinase	FBtr0088420;FBtr0304925;FBtr0333067;FBtr0088421;FBtr0088422	FBgn0003071;FBgn0003071;FBgn0003071;FBgn0003071;FBgn0003071	0;0;0;0;0
296	chr3R	26318008	26318266	259	2.8282	14.7866	96	26318355	26361986	43632	1	FBgn0053970	FBtr0100012	-89	43186	CG33970	uncharacterized protein	FBtr0100012;FBtr0346107	FBgn0053970;FBgn0053970	-89;-89
297	chrY	588404	588753	350	1.60874	14.7793	163	573088	664173	91086	1	FBgn0001313	FBtr0346722	15316	3355181	kl-2	male fertility factor kl2	FBtr0346722	FBgn0001313	0
298	chr3L	16969731	16969990	260	2.67741	14.6756	107	16970013	16994388	24376	1	FBgn0261547	FBtr0302651	-23	39900	Exn	Ephexin	FBtr0302651	FBgn0261547	0
299	chr2R	19126202	19126442	241	2.57733	14.6663	109	19122231	19126269	4039	2	FBgn0034417	FBtr0340457	0	37197	CG15117	uncharacterized protein	FBtr0340457;FBtr0340459;FBtr0100129;FBtr0086594;FBtr0086593	FBgn0034417;FBgn0034417;FBgn0034417;FBgn0034417;FBgn0034417	0;0;0;0;0
300	chr3L	14562711	14562928	218	2.63785	14.6311	133	14560139	14560764	626	2	FBgn0028418	FBtr0075722	-1947	47746	Lk	Leucokinin	FBtr0301014	FBgn0054039	2711
301	chr2R	18811817	18812073	257	2.51568	14.4938	106	18808356	18811460	3105	2	FBgn0034394	FBtr0086633	-357	37170	CG15096	uncharacterized protein	FBtr0086633;FBtr0086632	FBgn0034394;FBgn0034394	-357;0
302	chr3L	25896817	25897665	849	1.58533	14.4134	560	25843821	25844502	682	1	FBgn0266692	FBtr0345063	52996	NA	NA	NA	FBtr0113817;FBtr0333869;FBtr0113818	FBgn0058178;FBgn0058178;FBgn0058178	0;0;0
303	chr2L	16801850	16802054	205	2.79049	14.3155	137	16802026	16804077	2052	2	FBgn0032609	FBtr0331625	2023	35015	CG13280	uncharacterized protein	FBtr0331625;FBtr0080931;FBtr0080911;FBtr0080912;FBtr0344850	FBgn0032609;FBgn0032609;FBgn0040260;FBgn0040260;FBgn0040260	0;0;2825;2825;2082
304	chr2R	10617448	10617714	267	2.79049	14.3155	79	10617662	10640990	23329	1	FBgn0033538	FBtr0088283	0	36121	CG11883	uncharacterized protein	FBtr0088283;FBtr0088284;FBtr0339461;FBtr0330607;FBtr0346958	FBgn0033538;FBgn0033538;FBgn0033538;FBgn0263102;FBgn0263102	0;0;0;59560;59560
305	chr3L	3752818	3753032	215	2.79049	14.3155	114	3753693	3755201	1509	2	FBgn0035458	FBtr0303094	2169	38440	ppk27	pickpocket 27	FBtr0308639;FBtr0303097;FBtr0308638;FBtr0073187;FBtr0113430;FBtr0332986;FBtr0308637;FBtr0332987	FBgn0052264;FBgn0052264;FBgn0052264;FBgn0052264;FBgn0052264;FBgn0052264;FBgn0052264;FBgn0052264	0;0;0;0;0;0;0;0
306	chr3L	6942228	6942455	228	2.79049	14.3155	89	6942856	6948662	5807	1	FBgn0035719	FBtr0333079	-401	38755	tow	target of wingless	FBtr0333079;FBtr0333077;FBtr0333078;FBtr0333080	FBgn0035719;FBgn0035719;FBgn0035719;FBgn0035719	0;0;0;0
307	chr3L	12902747	12902946	200	2.79049	14.3155	96	12901247	12902737	1491	2	FBgn0036324	FBtr0343628	-10	39466	CG12520	uncharacterized protein	FBtr0113169;FBtr0343628;FBtr0075905	FBgn0036324;FBgn0036324;FBgn0052117	-10;-10;0
308	chrX	18479573	18479825	253	2.79049	14.3155	160	18443812	18479487	35676	2	FBgn0052547	FBtr0290002	-86	3346150	CG32547	uncharacterized protein	FBtr0113000;FBtr0074630;FBtr0343048;FBtr0332378;FBtr0290002;FBtr0346494	FBgn0030925;FBgn0030925;FBgn0030925;FBgn0052547;FBgn0052547;FBgn0267278	3947;3947;3947;-86;-86;-247
309	chr2L	21528469	21528773	305	1.83983	14.2865	184	21528480	21528515	36	1	FBgn0053744	FBtr0091742	0	NA	NA	NA	FBtr0091742;FBtr0091863;FBtr0091875;FBtr0091876	FBgn0053744;FBgn0053859;FBgn0053871;FBgn0053872	0;0;0;0
310	chr3R	8898965	8901675	2711	1.60021	14.2462	875	8827498	8931896	104399	2	FBgn0262614	FBtr0305301	30221	41062	pyd	polychaetoid	FBtr0305301	FBgn0262614	0
311	chr2R	21072691	21072907	217	2.73924	14.0722	121	21070368	21072789	2422	2	FBgn0034583	FBtr0071541	0	37393	CG10527	uncharacterized protein	FBtr0071541	FBgn0034583	0
312	chr3L	23112736	23113459	724	1.76276	14.0154	178	23101006	23103460	2455	1	FBgn0264492	FBtr0345139	11730	48448	CkIIalpha	casein kinase IIalpha	NA	NA	NA
313	chr3L	4240149	4240472	324	2.30047	13.9628	180	4240173	4242603	2431	1	FBgn0035515	FBtr0073225	0	38514	CG14997	uncharacterized protein	FBtr0073225;FBtr0073226;FBtr0346557	FBgn0035515;FBgn0035515;FBgn0267302	0;0;0
314	chr2L	20829908	20830210	303	2.56167	13.9317	146	20829609	20831161	1553	1	FBgn0051673	FBtr0339562	299	35348	CG31673	uncharacterized protein	FBtr0081422;FBtr0339562	FBgn0051673;FBgn0051673	0;0
315	chrX	23536224	23536588	365	1.60602	13.8811	66	23291700	23291729	30	1	FBgn0267524	FBtr0346898	244524	NA	NA	NA	NA	NA	NA
316	chr3L	628012	628352	341	1.75844	13.855	171	628435	643900	15466	1	FBgn0263039	FBtr0306918	-83	NA	NA	NA	FBtr0306918;FBtr0333725	FBgn0263039;FBgn0263039	0;0
317	chr2L	9915106	9915324	219	2.75278	13.8502	122	9915253	9917220	1968	1	FBgn0040064	FBtr0079876	0	34313	yip2	yippee interacting protein 2	FBtr0079875;FBtr0079876	FBgn0024285;FBgn0040064	2195;0
318	chr2R	17927251	17927508	258	2.75278	13.8502	111	17954545	17955295	751	1	FBgn0265591	FBtr0340284	-27037	NA	NA	NA	NA	NA	NA
319	chr2R	24685005	24685341	337	2.75278	13.8502	169	24671294	24685090	13797	2	FBgn0035049	FBtr0304005	0	37949	Mmp1	Matrix metalloproteinase 1	FBtr0304005;FBtr0304008;FBtr0304010;FBtr0304011;FBtr0273263;FBtr0304009;FBtr0306656;FBtr0304006;FBtr0273264;FBtr0304007	FBgn0035049;FBgn0035049;FBgn0035049;FBgn0035049;FBgn0035049;FBgn0035049;FBgn0035049;FBgn0035049;FBgn0035049;FBgn0035049	0;0;0;0;0;0;0;0;0;0
320	chr3L	25573082	25573483	402	1.61705	13.7872	254	25236940	25670980	434041	2	FBgn0267429	FBtr0346768	97497	26067050	CG45782	uncharacterized protein	FBtr0346768	FBgn0267429	0
321	chr2R	16196845	16197147	303	2.50881	13.7229	140	16197042	16199378	2337	1	FBgn0262026	FBtr0303860	0	10178840	CG42837	uncharacterized protein	FBtr0303860;FBtr0339084;FBtr0339085;FBtr0339086;FBtr0339087	FBgn0262026;FBgn0265177;FBgn0265177;FBgn0265178;FBgn0265178	0;0;0;0;-193
322	chr2L	2130663	2131055	393	2.07824	13.6673	129	2130813	2137043	6231	1	FBgn0004507	FBtr0100485	0	33386	GlyP	Glycogen phosphorylase	FBtr0100485;FBtr0077828	FBgn0004507;FBgn0004507	0;0
323	chrX	429311	430548	1238	1.60477	13.4177	597	316576	428251	111676	2	FBgn0052816	FBtr0273443	-1060	318225	CG32816	uncharacterized protein	FBtr0273442	FBgn0052816	0
324	chr2R	9186265	9186517	253	2.71507	13.3907	159	9177864	9186342	8479	2	FBgn0002567	FBtr0089932	0	35940	Rab32	Rab32	FBtr0089932;FBtr0089933;FBtr0089934;FBtr0088611;FBtr0302512;FBtr0344529;FBtr0344530	FBgn0002567;FBgn0002567;FBgn0002567;FBgn0033391;FBgn0033391;FBgn0266486;FBgn0266486	0;0;0;5579;5579;5579;5579
325	chr3L	8395035	8395234	200	2.71507	13.3907	99	8396000	8402295	6296	1	FBgn0035888	FBtr0307376	-766	38954	CG7120	uncharacterized protein	NA	NA	NA
326	chr3L	14756283	14756632	350	2.71507	13.3907	158	14747929	14757336	9408	2	FBgn0013263	FBtr0333045	704	2768981	Trl	Trithorax-like	FBtr0333045;FBtr0075707;FBtr0100445;FBtr0075705;FBtr0075706;FBtr0333046;FBtr0075703;FBtr0075704;FBtr0075708;FBtr0100444;FBtr0300641;FBtr0300642	FBgn0013263;FBgn0013263;FBgn0013263;FBgn0013263;FBgn0013263;FBgn0013263;FBgn0013263;FBgn0013263;FBgn0013263;FBgn0013263;FBgn0260233;FBgn0260233	0;0;0;0;0;0;0;0;0;0;0;0
327	chrX	9550862	9551063	202	2.71507	13.3907	111	9506732	9550838	44107	2	FBgn0267253	FBtr0071373	-24	31896	CG32700	uncharacterized protein	FBtr0343412;FBtr0071374;FBtr0071373	FBgn0028327;FBgn0267253;FBgn0267253	2598;-24;-24
328	chr2R	1517489	1517718	230	1.70401	13.2735	64	1515595	1516830	1236	2	FBgn0267861	FBtr0344972	-659	3354925	Maf1	Maf1	FBtr0113830;FBtr0113831;FBtr0113829;FBtr0301121	FBgn0267861;FBgn0267861;FBgn0267861;FBgn0267861	0;0;0;0
329	chr3L	24469853	24470775	923	1.53528	13.2021	290	24534090	24535468	1379	1	FBgn0040045	FBtr0307117	-63315	NA	NA	NA	NA	NA	NA
330	chr3L	2122441	2122642	202	2.66883	13.1853	93	2118498	2119567	1070	1	FBgn0267452	FBtr0346823	3943	NA	NA	NA	FBtr0332120;FBtr0332114;FBtr0332115;FBtr0332116;FBtr0332118;FBtr0332119	FBgn0052311;FBgn0052311;FBgn0052311;FBgn0052311;FBgn0052311;FBgn0052311	0;0;0;0;0;0
331	chrY	590836	591044	209	1.64211	13.1561	141	573088	664173	91086	1	FBgn0001313	FBtr0346722	17748	3355181	kl-2	male fertility factor kl2	FBtr0346722	FBgn0001313	0
332	chr2R	3304976	3305533	558	1.56107	13.1047	342	3334854	3336160	1307	1	FBgn0085570	FBtr0302915	-29321	NA	NA	NA	NA	NA	NA
333	chrY	124357	124743	387	1.47664	13.0929	179	22250	137486	115237	2	FBgn0267433	FBtr0346772	12743	26067054	kl-5	male fertility factor kl5	FBtr0346772	FBgn0267433	0
334	chr3L	24464651	24465188	538	1.55477	13.0523	114	24534090	24535468	1379	1	FBgn0040045	FBtr0307117	-68902	NA	NA	NA	NA	NA	NA
335	chr2L	21496674	21496979	306	1.78964	12.9716	122	21496586	21497608	1023	1	FBgn0053840	FBtr0091844	88	318854	His1:CG31617	histone H1	FBtr0091844	FBgn0053840	0
336	chr2L	21531363	21531580	218	1.79581	12.9109	153	21531302	21532324	1023	1	FBgn0053861	FBtr0091865	61	3771736	His1:CG33861	histone H1	FBtr0091865	FBgn0053861	0
337	chr3R	2954267	2956123	1857	1.56199	12.8677	857	2744305	2744800	496	2	FBgn0266747	FBtr0345281	-209467	NA	NA	NA	FBtr0445191	FBgn0267430	0
338	chrX	21845072	21846158	1087	1.54341	12.8663	748	21631891	21790731	158841	1	FBgn0267704	FBtr0347227	213181	NA	NA	NA	NA	NA	NA
339	chr3R	30889068	30889270	203	2.65883	12.7931	113	30883464	30889062	5599	2	FBgn0000416	FBtr0085713	-6	43662	Sap-r	Saposin-related	FBtr0085714;FBtr0085713	FBgn0000416;FBgn0000416	-242;-6
340	chr2R	3309229	3309758	530	1.54406	12.7784	304	3334854	3336160	1307	1	FBgn0085570	FBtr0302915	-25096	NA	NA	NA	NA	NA	NA
341	chr2L	23186823	23187173	351	2.47018	12.6721	180	23161122	23174484	13363	2	FBgn0039958	FBtr0300704	-12339	3355094	CG12567	uncharacterized protein	NA	NA	NA
342	chr3L	2489989	2490242	254	2.21896	12.6696	102	2490220	2492613	2394	1	FBgn0035346	FBtr0072923	0	38313	CG1146	uncharacterized protein	FBtr0072921;FBtr0072922;FBtr0072923;FBtr0344219;FBtr0345112;FBtr0345104;FBtr0345105;FBtr0345106;FBtr0345107	FBgn0035346;FBgn0035346;FBgn0035346;FBgn0035346;FBgn0266696;FBgn0266696;FBgn0266696;FBgn0266696;FBgn0266696	0;0;0;-358;0;0;0;0;0
343	chr3L	3193035	3193260	226	1.98307	12.5981	128	3193216	3197059	3844	1	FBgn0001233	FBtr0073040	0	38389	Hsp83	Heat shock protein 83	FBtr0332873;FBtr0073040	FBgn0001233;FBgn0001233	0;0
344	chr2R	1825705	1826132	428	1.46559	12.577	273	1806864	1807342	479	2	FBgn0085784	FBtr0114236	-18363	NA	NA	NA	NA	NA	NA
345	chr2R	15657816	15658254	439	2.63965	12.4894	68	15657066	15657163	98	1	FBgn0262403	FBtr0304315	750	NA	NA	NA	FBtr0087348;FBtr0306648;FBtr0302330;FBtr0087345	FBgn0023441;FBgn0023441;FBgn0023441;FBgn0023441	0;0;0;0
346	chr3R	7492261	7492474	214	2.63965	12.4894	118	7486583	7491603	5021	2	FBgn0015569	FBtr0289953	-658	40896	alpha-Est10	alpha-Esterase-10	FBtr0305910;FBtr0302437	FBgn0015569;FBgn0261508	0;797
347	chr3R	14024843	14025289	447	2.63965	12.4894	162	13967955	14025962	58008	2	FBgn0264493	FBtr0301634	673	41704	rdx	roadkill	FBtr0301634;FBtr0301633	FBgn0264493;FBgn0264493	0;0
348	chrX	10474812	10475018	207	2.63965	12.4894	90	10474716	10477201	2486	1	FBgn0030206	FBtr0307487	96	31977	CG2889	uncharacterized protein	FBtr0071450;FBtr0307487;FBtr0071461	FBgn0030206;FBgn0030206;FBgn0261710	0;0;-137
349	chr3L	660980	661647	668	1.8032	12.4887	102	654363	657971	3609	1	FBgn0035150	FBtr0072557	6617	38079	Rev1	Rev1	NA	NA	NA
350	chrY	285539	285987	449	1.61685	12.4692	376	335386	335911	526	2	FBgn0267608	FBtr0347038	49924	NA	NA	NA	NA	NA	NA
351	chr3L	3942766	3943051	286	2.52614	12.4636	123	3942850	3946447	3598	1	FBgn0035477	FBtr0073163	0	38464	CG14982	uncharacterized protein	FBtr0073171;FBtr0333134;FBtr0073163	FBgn0027552;FBgn0035477;FBgn0035477	0;0;0
352	chr2L	21529898	21530300	403	1.7705	12.4545	158	21529795	21530323	529	1	FBgn0053860	FBtr0091864	103	318847	His3:CG31613	histone H3	FBtr0091864;FBtr0091875	FBgn0053860;FBgn0053871	0;0
353	chr2L	21483177	21483615	439	1.74917	12.4235	187	21483366	21483401	36	1	FBgn0053735	FBtr0091733	0	NA	NA	NA	FBtr0091733;FBtr0091836;FBtr0091893;FBtr0091894	FBgn0053735;FBgn0053832;FBgn0053889;FBgn0053890	0;0;0;0
354	chr2L	1884541	1884882	342	2.5031	12.4088	207	1884622	1943461	58840	1	FBgn0031374	FBtr0113012	0	33367	Wdr62	WD repeat domain 62	FBtr0113012;FBtr0333007;FBtr0077811	FBgn0031374;FBgn0031374;FBgn0031374	0;0;0
355	chrY	1642127	1642453	327	1.46191	12.4071	207	1636574	1884846	248273	1	FBgn0046697	FBtr0346721	5553	3355180	Ppr-Y	Ppr-Y	FBtr0346721	FBgn0046697	0
356	chr3R	30014988	30015458	471	2.34504	12.3952	287	30010476	30015165	4690	2	FBgn0039737	FBtr0334706	0	43562	CG7920	uncharacterized protein	FBtr0334706;FBtr0085603;FBtr0085602;FBtr0100418;FBtr0334705	FBgn0039737;FBgn0039737;FBgn0039738;FBgn0039738;FBgn0039738	0;0;6763;6763;6763
357	chrX	23432271	23432602	332	1.58558	12.3571	71	23291700	23291729	30	1	FBgn0267524	FBtr0346898	140571	NA	NA	NA	NA	NA	NA
358	chr3L	16495284	16495490	207	2.59315	12.2797	130	16491838	16495268	3431	2	FBgn0260388	FBtr0300657	-16	8674108	CG42514	uncharacterized protein	FBtr0075390;FBtr0300657;FBtr0300655;FBtr0300656;FBtr0307367	FBgn0053158;FBgn0260388;FBgn0260388;FBgn0260388;FBgn0263131	0;-16;0;0;0
359	chr3R	24572365	24572982	618	2.34374	12.2592	444	24559789	24572495	12707	2	FBgn0039209	FBtr0084675	0	42930	REPTOR	Repressed by TOR	FBtr0084672;FBtr0084674;FBtr0110796;FBtr0084673;FBtr0110795;FBtr0345204;FBtr0084675	FBgn0039209;FBgn0039209;FBgn0039209;FBgn0039209;FBgn0039209;FBgn0039209;FBgn0039209	0;0;0;0;0;-400;0
360	chr2R	15861279	15862098	820	1.94757	12.1381	115	15857752	15861344	3593	2	FBgn0022160	FBtr0112900	0	47611	Gpo-1	Glycerophosphate oxidase-1	FBtr0112900;FBtr0087309;FBtr0087308;FBtr0087307	FBgn0022160;FBgn0022160;FBgn0022160;FBgn0022160	0;0;0;0
361	chr2L	21497061	21497524	464	1.76844	12.1124	291	21496586	21497608	1023	1	FBgn0053840	FBtr0091844	475	318854	His1:CG31617	histone H1	FBtr0091844;FBtr0091888	FBgn0053840;FBgn0053884	0;0
362	chr3L	25131456	25131777	322	1.96663	12.1029	164	25120749	25126171	5423	1	FBgn0260008	FBtr0343636	10707	5740185	UQCR-11	Ubiquinol-cytochrome c reductase 11 kDa subunit	NA	NA	NA
363	chr2L	5195734	5196026	293	2.60194	12.0477	147	5196035	5196097	63	1	FBgn0065107	FBtr0091919	-9	NA	NA	NA	FBtr0091919;FBtr0303389;FBtr0332403;FBtr0332404;FBtr0303388;FBtr0303385;FBtr0332405;FBtr0332406;FBtr0303387	FBgn0065107;FBgn0261836;FBgn0261836;FBgn0261836;FBgn0261836;FBgn0261836;FBgn0261836;FBgn0261836;FBgn0261836	-9;0;0;0;0;0;0;0;0
364	chr2L	6412077	6412321	245	2.60194	12.0477	168	6412315	6414418	2104	1	FBgn0031811	FBtr0343151	0	33895	CG13982	uncharacterized protein	FBtr0343151;FBtr0079256	FBgn0031811;FBgn0031811	0;0
365	chr2R	7387249	7387490	242	2.60194	12.0477	128	7387324	7391023	3700	1	FBgn0033160	FBtr0336909	0	35654	Dhx15	DEAH-box helicase 15	FBtr0089015;FBtr0336916;FBtr0088966;FBtr0336909	FBgn0000352;FBgn0000352;FBgn0033160;FBgn0033160	-134;-134;0;0
366	chrY	590499	590728	230	1.61119	12.0135	193	573088	664173	91086	1	FBgn0001313	FBtr0346722	17411	3355181	kl-2	male fertility factor kl2	FBtr0346722	FBgn0001313	0
367	chr3L	24858314	24858516	203	2.3184	12.01	87	24927130	24927710	581	1	FBgn0085736	FBtr0302233	-68614	3355155	ND-AGGG	NADH dehydrogenase (ubiquinone) AGGG subunit	NA	NA	NA
368	chr2R	3311881	3312825	945	1.53069	11.9965	173	3334854	3336160	1307	1	FBgn0085570	FBtr0302915	-22029	NA	NA	NA	NA	NA	NA
369	chr2R	12474200	12474539	340	2.47059	11.9926	161	12474424	12486743	12320	1	FBgn0033744	FBtr0087936	0	36368	Dh44-R2	Diuretic hormone 44 receptor 2	FBtr0087935;FBtr0087936;FBtr0113075	FBgn0033742;FBgn0033744;FBgn0033744	2285;0;0
370	chr3L	25371170	25371555	386	1.55807	11.9524	134	25403776	25405940	2165	2	FBgn0085734	FBtr0114183	34385	NA	NA	NA	FBtr0346768	FBgn0267429	0
371	chr2L	15035307	15035630	324	2.44924	11.9451	162	15035394	15037841	2448	1	FBgn0041713	FBtr0345641	0	34879	yellow-c	yellow-c	FBtr0345641;FBtr0080699	FBgn0041713;FBgn0041713	0;0
372	chrX	21850029	21850568	540	1.54393	11.9398	350	21631891	21790731	158841	1	FBgn0267704	FBtr0347227	218138	NA	NA	NA	NA	NA	NA
373	chr2L	21462453	21462712	260	1.78909	11.9025	168	21462332	21462926	595	2	FBgn0053898	FBtr0091902	214	326273	His2B:CG17949	histone H2B	FBtr0091729;FBtr0091823;FBtr0091824;FBtr0091902	FBgn0053731;FBgn0053819;FBgn0053820;FBgn0053898	0;0;0;0
374	chr3L	17913180	17913426	247	2.50877	11.8946	150	17909483	17912565	3083	2	FBgn0036772	FBtr0075152	-615	39998	CG5290	uncharacterized protein	NA	NA	NA
375	chr3L	635067	635841	775	1.66873	11.8679	213	637486	638041	556	2	FBgn0263342	FBtr0308776	2200	NA	NA	NA	FBtr0306918;FBtr0333725	FBgn0263039;FBgn0263039	0;0
376	chrX	23212310	23212656	347	1.55897	11.8651	295	23211192	23213166	1975	1	FBgn0085813	FBtr0346892	1118	NA	NA	NA	FBtr0346892	FBgn0085813	0
377	chr2R	3307599	3308129	531	1.53786	11.8639	113	3334854	3336160	1307	1	FBgn0085570	FBtr0302915	-26725	NA	NA	NA	NA	NA	NA
378	chr2L	12586956	12587166	211	2.55662	11.8463	66	12587625	12628135	40511	1	FBgn0085424	FBtr0112642	-459	34669	nub	nubbin	FBtr0112642	FBgn0085424	-459
379	chr3L	14942863	14943064	202	2.55662	11.8463	91	14943730	14944331	602	2	FBgn0040809	FBtr0075674	1267	50282	CG13465	uncharacterized protein	FBtr0299509;FBtr0331181;FBtr0299510;FBtr0330139	FBgn0259099;FBgn0259099;FBgn0259099;FBgn0259099	0;0;0;16431
380	chr3L	25810534	25810786	253	2.55662	11.8463	150	25843821	25844502	682	1	FBgn0266692	FBtr0345062	-33035	NA	NA	NA	FBtr0113817;FBtr0333869;FBtr0113818	FBgn0058178;FBgn0058178;FBgn0058178	0;0;0
381	chr3L	25898455	25899822	1368	1.53807	11.8345	190	25843821	25844502	682	1	FBgn0266692	FBtr0345063	54634	NA	NA	NA	FBtr0113817;FBtr0333869;FBtr0113818	FBgn0058178;FBgn0058178;FBgn0058178	0;0;0
382	chr2R	4868320	4868875	556	1.59419	11.8164	293	4895730	4907685	11956	2	FBgn0264911	FBtr0345943	38810	14462537	CG44102	uncharacterized protein	NA	NA	NA
383	chr2L	21452381	21452758	378	1.76239	11.8137	123	21452211	21452805	595	2	FBgn0053902	FBtr0091906	47	326273	His2B:CG17949	histone H2B	FBtr0091727;FBtr0091817;FBtr0091818;FBtr0091906	FBgn0053729;FBgn0053813;FBgn0053814;FBgn0053902	0;0;0;0
384	chr2R	8082864	8083098	235	2.53063	11.7864	117	8080559	8083075	2517	2	FBgn0025469	FBtr0310369	0	35773	slv	saliva	FBtr0310369;FBtr0339280;FBtr0088777	FBgn0025469;FBgn0025469;FBgn0028563	0;0;0
385	chrY	2116704	2116914	211	1.60583	11.7447	45	2266650	2267259	610	2	FBgn0267593	FBtr0347032	150345	NA	NA	NA	NA	NA	NA
386	chr2L	21494983	21495371	389	1.77025	11.7271	83	21494875	21495403	529	1	FBgn0053839	FBtr0091843	108	318847	His3:CG31613	histone H3	FBtr0091843;FBtr0091889	FBgn0053839;FBgn0053885	0;0
387	chr2R	9605847	9606082	236	2.53782	11.6995	136	9605988	9607184	1197	1	FBgn0050000	FBtr0088463	0	35995	GstT1	Glutathione S transferase T1	FBtr0088531;FBtr0088532;FBtr0088463;FBtr0339353	FBgn0033434;FBgn0033434;FBgn0050000;FBgn0265312	11802;2126;0;0
388	chr4	415489	415902	414	2.25219	11.6956	123	426067	426601	535	1	FBgn0263385	FBtr0309072	-10165	NA	NA	NA	NA	NA	NA
389	chr2L	21476957	21477241	285	1.81548	11.6864	126	21476302	21477324	1023	1	FBgn0053828	FBtr0091832	655	318854	His1:CG31617	histone H1	FBtr0091832;FBtr0091896	FBgn0053828;FBgn0053892	0;0
390	chr3R	14025878	14026111	234	2.56423	11.6122	88	13967955	14025962	58008	2	FBgn0264493	FBtr0301634	0	41704	rdx	roadkill	FBtr0301634;FBtr0301633	FBgn0264493;FBgn0264493	0;0
391	chr3R	15901360	15901828	469	2.56423	11.6122	147	15896926	15901382	4457	2	FBgn0027657	FBtr0083246	0	41930	glob1	globin 1	FBtr0083246;FBtr0083247;FBtr0083245;FBtr0083248;FBtr0344381;FBtr0300895	FBgn0027657;FBgn0027657;FBgn0027657;FBgn0027657;FBgn0027657;FBgn0027657	0;0;0;0;0;0
392	chr2L	21420209	21420441	233	1.75667	11.5841	72	21420129	21420657	529	1	FBgn0053803	FBtr0091807	80	318847	His3:CG31613	histone H3	FBtr0091807;FBtr0091913	FBgn0053803;FBgn0053909	0;0
393	chr2L	21534737	21535139	403	1.79409	11.5575	127	21534636	21535164	529	1	FBgn0053863	FBtr0091867	101	318847	His3:CG31613	histone H3	FBtr0091867;FBtr0091873	FBgn0053863;FBgn0053869	0;-127
394	chr3L	25372045	25372306	262	1.57112	11.5148	80	25403776	25405940	2165	2	FBgn0085734	FBtr0114183	33634	NA	NA	NA	FBtr0346768	FBgn0267429	0
395	chr3R	2088425	2088644	220	1.52133	11.5003	52	2156916	2157206	291	2	FBgn0058182	FBtr0302347	68562	NA	NA	NA	FBtr0392909	FBgn0267431	0
396	chr2R	4867301	4867998	698	1.7943	11.4985	197	4829246	4830587	1342	1	FBgn0033000	FBtr0345361	38055	3355132	CG14464	uncharacterized protein	NA	NA	NA
397	chr2R	7745186	7745545	360	2.42741	11.4917	162	7737019	7745297	8279	2	FBgn0050497	FBtr0331966	0	246653	CG30497	uncharacterized protein	FBtr0331966;FBtr0088933;FBtr0088932;FBtr0344568;FBtr0344566;FBtr0344565	FBgn0050497;FBgn0050497;FBgn0050497;FBgn0266526;FBgn0266526;FBgn0266526	0;0;0;0;0;0
398	chr2L	21430310	21430709	400	1.76321	11.473	126	21430255	21430783	529	1	FBgn0053806	FBtr0091810	55	318847	His3:CG31613	histone H3	FBtr0091810;FBtr0091911	FBgn0053806;FBgn0053907	0;-244
399	chr2R	1518425	1521135	2711	1.52771	11.4523	328	1515595	1521780	6186	2	FBgn0267861	FBtr0113831	645	3354925	Maf1	Maf1	FBtr0113830;FBtr0113831;FBtr0113829;FBtr0301121	FBgn0267861;FBgn0267861;FBgn0267861;FBgn0267861	0;0;0;0
400	chr3L	24441753	24442615	863	1.50469	11.4495	638	24534090	24535468	1379	1	FBgn0040045	FBtr0307117	-91475	NA	NA	NA	NA	NA	NA
401	chr3R	21060291	21060923	633	1.6379	11.4313	479	21051383	21060653	9271	2	FBgn0011672	FBtr0301477	0	42490	Mvl	Malvolio	FBtr0301477;FBtr0089521;FBtr0330046;FBtr0301478;FBtr0306351;FBtr0306350	FBgn0011672;FBgn0011672;FBgn0011672;FBgn0011672;FBgn0011672;FBgn0011672	0;0;0;0;0;0
402	chr3L	21239957	21240427	471	2.3605	11.4239	123	21240347	21266503	26157	1	FBgn0004865	FBtr0078307	0	40345	Eip78C	Ecdysone-induced protein 78C	FBtr0306158;FBtr0306157;FBtr0078306;FBtr0078307	FBgn0004865;FBgn0004865;FBgn0004865;FBgn0004865	0;0;0;0
403	chr3R	25292804	25293081	278	2.3605	11.4239	165	25291370	25292977	1608	2	FBgn0051098	FBtr0084863	0	43057	CG31098	uncharacterized protein	FBtr0084863;FBtr0084862;FBtr0335234	FBgn0051098;FBgn0051102;FBgn0051102	0;2513;2513
404	chrX	23281560	23281811	252	1.6532	11.4126	157	23280998	23282931	1934	2	FBgn0267521	FBtr0346900	1120	NA	NA	NA	FBtr0346899;FBtr0346900	FBgn0267516;FBgn0267521	0;0
405	chr2R	15951174	15951443	270	2.2221	11.387	122	15946933	15951148	4216	2	FBgn0265045	FBtr0336643	-26	36753	Strn-Mlck	Stretchin-Mlck	FBtr0336643;FBtr0336646;FBtr0336647;FBtr0336644;FBtr0336649;FBtr0336650;FBtr0336651;FBtr0336652;FBtr0336645	FBgn0265045;FBgn0265045;FBgn0265045;FBgn0265045;FBgn0265045;FBgn0265045;FBgn0265045;FBgn0265045;FBgn0265045	-26;0;0;0;0;0;0;0;5458
406	chr2R	3305589	3305800	212	1.59419	11.3599	164	3334854	3336160	1307	1	FBgn0085570	FBtr0302915	-29054	NA	NA	NA	NA	NA	NA
407	chr2R	2348708	2349230	523	1.81445	11.3426	155	2374631	2375134	504	1	FBgn0058100	FBtr0302913	-25401	NA	NA	NA	NA	NA	NA
408	chr3L	5117266	5117543	278	1.61487	11.3252	174	5129674	5130240	567	1	FBgn0035594	FBtr0077162	-12131	38604	CG4597	uncharacterized protein	NA	NA	NA
409	chr3L	926066	926350	285	1.77436	11.3204	185	914074	985622	71549	1	FBgn0264574	FBtr0333503	11992	38109	Glut1	Glucose transporter 1	FBtr0333506;FBtr0333504;FBtr0333505;FBtr0333500;FBtr0333503	FBgn0264574;FBgn0264574;FBgn0264574;FBgn0264574;FBgn0264574	0;0;0;0;0
410	chr2L	21421931	21422163	233	1.718	11.2738	114	21421855	21422877	1023	1	FBgn0051617	FBtr0085892	76	318854	His1:CG31617	histone H1	FBtr0085892	FBgn0051617	0
411	chr3L	25567930	25568959	1030	1.50521	11.2709	504	25236940	25670980	434041	2	FBgn0267429	FBtr0346768	102021	26067050	CG45782	uncharacterized protein	FBtr0346768	FBgn0267429	0
412	chr3R	23386172	23386409	238	2.39594	11.225	112	23377211	23384777	7567	2	FBgn0039075	FBtr0301085	-1395	42764	CG4393	uncharacterized protein	NA	NA	NA
413	chrX	23217012	23218405	1394	1.52913	11.216	90	23214452	23217140	2689	1	FBgn0267519	FBtr0346895	2560	NA	NA	NA	FBtr0346895	FBgn0267519	0
414	chr2R	4864700	4866164	1465	1.8343	11.2147	1065	4829246	4830587	1342	1	FBgn0033000	FBtr0345361	35454	3355132	CG14464	uncharacterized protein	NA	NA	NA
415	chr2L	21440233	21440615	383	1.72265	11.2021	191	21440187	21440715	529	1	FBgn0053812	FBtr0091816	46	318847	His3:CG31613	histone H3	FBtr0091816;FBtr0091907	FBgn0053812;FBgn0053903	0;0
416	chr3L	25575813	25576029	217	1.60607	11.1953	23	25236940	25670980	434041	2	FBgn0267429	FBtr0346768	94951	26067050	CG45782	uncharacterized protein	FBtr0346768	FBgn0267429	0
417	chr3R	2957644	2958016	373	1.53324	11.1947	175	2744305	2744800	496	2	FBgn0266747	FBtr0345281	-212844	NA	NA	NA	FBtr0445191	FBgn0267430	0
418	chr2L	6036786	6037025	240	2.52652	11.1829	134	6034731	6037015	2285	2	FBgn0025742	FBtr0345290	0	33845	mtm	myotubularin	FBtr0345290;FBtr0079223;FBtr0079222	FBgn0025742;FBgn0025742;FBgn0031766	0;0;0
419	chr2R	10025809	10026187	379	2.52652	11.1829	308	9993890	10026042	32153	2	FBgn0022382	FBtr0088438	0	36041	Pka-R2	Protein kinase, cAMP-dependent, regulatory subunit type 2	FBtr0088438;FBtr0088437;FBtr0112901;FBtr0112902;FBtr0339421	FBgn0022382;FBgn0022382;FBgn0022382;FBgn0022382;FBgn0265340	0;0;0;0;571
420	chr3R	20957599	20957875	277	2.52652	11.1829	146	20957734	20974337	16604	1	FBgn0002921	FBtr0089511	0	48971	Atpalpha	Na pump alpha subunit	FBtr0333324;FBtr0089510;FBtr0333325;FBtr0089509;FBtr0089514;FBtr0089515;FBtr0300191;FBtr0089511;FBtr0089512;FBtr0089513;FBtr0089516	FBgn0002921;FBgn0002921;FBgn0002921;FBgn0002921;FBgn0002921;FBgn0002921;FBgn0002921;FBgn0002921;FBgn0002921;FBgn0002921;FBgn0002921	0;0;0;0;0;0;0;0;0;0;0
421	chr2L	21503363	21503935	573	1.73314	11.1287	109	21503660	21503695	36	1	FBgn0053739	FBtr0091737	0	NA	NA	NA	FBtr0091737;FBtr0091848;FBtr0091885;FBtr0091886	FBgn0053739;FBgn0053844;FBgn0053881;FBgn0053882	0;0;854;0
422	chr2L	21427018	21427425	408	1.66896	11.0838	77	21426916	21427938	1023	1	FBgn0053804	FBtr0091808	102	318854	His1:CG31617	histone H1	FBtr0091808	FBgn0053804	0
423	chrX	6013128	6013403	276	2.089	11.0636	100	6008183	6013181	4999	2	FBgn0029003	FBtr0070890	0	NA	NA	NA	FBtr0070890;FBtr0340604	FBgn0029003;FBgn0265692	0;-305
424	chr3R	2958069	2958661	593	1.50584	11.0626	478	2744305	2744800	496	2	FBgn0266747	FBtr0345281	-213269	NA	NA	NA	FBtr0445191	FBgn0267430	0
425	chr2L	21515180	21515459	280	1.73252	11.0606	180	21515062	21515590	529	1	FBgn0053851	FBtr0091855	118	318847	His3:CG31613	histone H3	FBtr0091855;FBtr0091881	FBgn0053851;FBgn0053877	0;-302
426	chr3R	30206063	30206281	219	2.4149	10.993	105	30206783	30206926	144	2	FBgn0086664	FBtr0091777	645	NA	NA	NA	FBtr0339183;FBtr0089423;FBtr0089422;FBtr0089425	FBgn0039757;FBgn0039757;FBgn0039757;FBgn0039757	2413;2661;2667;2739
427	chr2L	21542946	21543385	440	1.73776	10.9909	125	21542864	21543688	825	1	FBgn0051614	FBtr0085895	82	NA	NA	NA	FBtr0085895	FBgn0051614	0
428	chr2L	21536422	21537298	877	1.71308	10.9586	77	21536346	21537368	1023	1	FBgn0053864	FBtr0091868	76	318854	His1:CG31617	histone H1	FBtr0091868;FBtr0091872	FBgn0053864;FBgn0053868	0;801
429	chr3R	2088071	2088364	294	1.51323	10.9211	88	2156916	2157206	291	2	FBgn0058182	FBtr0302347	68842	NA	NA	NA	FBtr0392909	FBgn0267431	0
430	chr3L	22100916	22101494	579	1.53103	10.9206	324	22082808	22083184	377	1	FBgn0004414	FBtr0078482	18108	45962	msopa	male-specific opa containing gene	NA	NA	NA
431	chr2R	12140485	12140728	244	2.36911	10.8708	98	12140631	12143272	2642	1	FBgn0027495	FBtr0087983	0	36299	Smyd4-4	SET and MYND domain containing, class 4, member 4	FBtr0088020;FBtr0087983	FBgn0026176;FBgn0027495	-256;0
432	chr2R	5726567	5727316	750	1.69783	10.8166	648	5706202	5726832	20631	2	FBgn0267978	FBtr0086058	0	35509	ap	apterous	FBtr0086058;FBtr0300504;FBtr0335274	FBgn0267978;FBgn0267978;FBgn0267978	0;0;0
433	chrX	23224411	23224999	589	1.72422	10.7906	273	23214452	23217140	2689	1	FBgn0267519	FBtr0346895	9959	NA	NA	NA	NA	NA	NA
434	chr3R	31725596	31725824	229	2.48881	10.7599	125	31725780	31732768	6989	1	FBgn0003870	FBtr0085830	0	48317	ttk	tramtrack	FBtr0085826;FBtr0085825;FBtr0085828;FBtr0085827;FBtr0085830;FBtr0085829	FBgn0003870;FBgn0003870;FBgn0003870;FBgn0003870;FBgn0003870;FBgn0003870	0;0;0;0;0;0
435	chr3L	2192135	2192404	270	2.35382	10.7421	131	2189160	2192221	3062	2	FBgn0026593	FBtr0072912	0	48422	CG5707	uncharacterized protein	FBtr0308230;FBtr0072912;FBtr0308231	FBgn0026593;FBgn0026593;FBgn0026593	-412;0;0
436	chr2L	21457785	21458355	571	1.68083	10.7323	425	21458134	21458169	36	1	FBgn0053730	FBtr0091728	0	NA	NA	NA	FBtr0091728;FBtr0091821;FBtr0091903;FBtr0091904	FBgn0053730;FBgn0053817;FBgn0053899;FBgn0053900	0;0;910;0
437	chrY	589151	589481	331	1.50141	10.6713	140	573088	664173	91086	1	FBgn0001313	FBtr0346722	16063	3355181	kl-2	male fertility factor kl2	FBtr0346722	FBgn0001313	0
438	chr3L	17533389	17533636	248	2.43663	10.6367	152	17533506	17546376	12871	1	FBgn0259174	FBtr0299645	0	39958	Nedd4	Nedd4	FBtr0299646;FBtr0299647;FBtr0299648;FBtr0300520;FBtr0331843;FBtr0331844;FBtr0300519;FBtr0299645;FBtr0299642	FBgn0259174;FBgn0259174;FBgn0259174;FBgn0259174;FBgn0259174;FBgn0259174;FBgn0259174;FBgn0259174;FBgn0259174	0;0;0;0;0;0;0;0;-115
439	chr3R	4717685	4717893	209	2.47159	10.6315	97	4718589	4719399	811	2	FBgn0266228	FBtr0343891	1506	NA	NA	NA	NA	NA	NA
440	chr3L	24465342	24466163	822	1.5074	10.5862	135	24534090	24535468	1379	1	FBgn0040045	FBtr0307117	-67927	NA	NA	NA	NA	NA	NA
441	chr2L	1385021	1385226	206	2.04326	10.5339	76	1380083	1381326	1244	2	FBgn0266203	FBtr0343843	-3695	NA	NA	NA	FBtr0077941;FBtr0329985	FBgn0002543;FBgn0002543	0;0
442	chr3L	21769613	21769836	224	2.40145	10.4944	97	21769815	21771321	1507	1	FBgn0037133	FBtr0078436	0	40427	CG7370	uncharacterized protein	FBtr0078450;FBtr0310451;FBtr0333892;FBtr0333893;FBtr0078436	FBgn0037130;FBgn0037130;FBgn0037130;FBgn0037130;FBgn0037133	0;0;0;0;0
443	chr3L	24467416	24468989	1574	1.47156	10.4726	1260	24534090	24535468	1379	1	FBgn0040045	FBtr0307117	-65101	NA	NA	NA	NA	NA	NA
444	chr3R	13980199	13980546	348	2.15117	10.4515	153	13967955	13983363	15409	2	FBgn0264493	FBtr0100361	2817	41704	rdx	roadkill	FBtr0100361;FBtr0301634;FBtr0301633	FBgn0264493;FBgn0264493;FBgn0264493	0;0;0
445	chr3L	21382394	21382673	280	2.14023	10.442	117	21382501	21424061	41561	1	FBgn0261258	FBtr0309230	0	40368	rgn	regeneration	FBtr0309230;FBtr0333385;FBtr0333386;FBtr0078346	FBgn0261258;FBgn0261258;FBgn0261258;FBgn0261258	0;0;0;0
446	chrX	434064	434444	381	1.55013	10.4253	254	436139	437448	1310	2	FBgn0011822	FBtr0070100	3004	30984	Pgcl	Pepsinogen C-like	FBtr0273442	FBgn0052816	0
447	chr2L	21422486	21422760	275	1.71576	10.4126	169	21421855	21422877	1023	1	FBgn0051617	FBtr0085892	631	318854	His1:CG31617	histone H1	FBtr0085892;FBtr0085927	FBgn0051617;FBgn0061209	0;0
448	chrX	23409490	23409839	350	2.39019	10.406	167	23291700	23291729	30	1	FBgn0267524	FBtr0346898	117790	NA	NA	NA	NA	NA	NA
449	chr3L	25897872	25898137	266	1.4911	10.3995	113	25843821	25844502	682	1	FBgn0266692	FBtr0345063	54051	NA	NA	NA	FBtr0113817;FBtr0333869;FBtr0113818	FBgn0058178;FBgn0058178;FBgn0058178	0;0;0
450	chr2L	21453892	21454095	204	1.7088	10.3913	74	21453790	21454202	413	2	FBgn0053901	FBtr0091905	107	41773	His4r	Histone H4 replacement	FBtr0091818;FBtr0091819;FBtr0091905	FBgn0053814;FBgn0053815;FBgn0053901	0;0;0
451	chrX	23215512	23215965	454	1.45447	10.3588	267	23214452	23217140	2689	1	FBgn0267519	FBtr0346895	1060	NA	NA	NA	FBtr0346895	FBgn0267519	0
452	chr2L	6465607	6465820	214	2.4511	10.3433	41	6459015	6465669	6655	2	FBgn0031816	FBtr0079271	0	33901	Rchy1	Ring finger and CHY zinc finger domain containing 1	FBtr0079271;FBtr0331186;FBtr0079270	FBgn0031816;FBgn0031816;FBgn0031817	0;0;1878
453	chr2R	6266096	6266338	243	2.4511	10.3433	120	6245512	6255266	9755	1	FBgn0033075	FBtr0336520	20584	35554	Pld	Phospholipase D	NA	NA	NA
454	chr3R	16264035	16264234	200	2.4511	10.3433	94	16261355	16264095	2741	2	FBgn0040237	FBtr0083276	0	53565	bor	belphegor	FBtr0083259;FBtr0083276;FBtr0305998	FBgn0020407;FBgn0040237;FBgn0040237	-37;0;0
455	chr3R	30243551	30243815	265	2.4511	10.3433	119	30241268	30243312	2045	2	FBgn0039758	FBtr0085639	-239	43600	CG9737	uncharacterized protein	FBtr0085639;FBtr0085638;FBtr0345122	FBgn0039758;FBgn0039759;FBgn0039759	-239;2888;2888
456	chrX	13783554	13783852	299	2.4511	10.3433	181	13783714	13807627	23914	1	FBgn0261244	FBtr0073826	0	32343	inaE	inactivation no afterpotential E	FBtr0100218;FBtr0073826;FBtr0073825;FBtr0290302;FBtr0290303;FBtr0340290;FBtr0340291	FBgn0030522;FBgn0261244;FBgn0261244;FBgn0261244;FBgn0261244;FBgn0261244;FBgn0261244	1095;0;0;0;0;0;0
457	chr2L	21487814	21488089	276	1.72398	10.3433	85	21487655	21488249	595	2	FBgn0053888	FBtr0091892	160	326273	His2B:CG17949	histone H2B	FBtr0091734;FBtr0091838;FBtr0091839;FBtr0091892	FBgn0053736;FBgn0053834;FBgn0053835;FBgn0053888	0;0;0;0
458	chr2R	3775798	3776152	355	1.80799	10.3287	266	3647346	3647765	420	1	FBgn0085512	FBtr0310523	128452	5740597	RYa	RYamide	NA	NA	NA
459	chr3R	12442915	12443226	312	2.26413	10.3269	189	12443582	12447616	4035	1	FBgn0086687	FBtr0082629	-356	117369	Desat1	Desaturase 1	FBtr0082626;FBtr0082627;FBtr0082628;FBtr0082629	FBgn0086687;FBgn0086687;FBgn0086687;FBgn0086687	0;0;0;-356
460	chrX	21060560	21060808	249	2.44654	10.3096	120	21062422	21064190	1769	2	FBgn0052512	FBtr0332847	3382	33085	CG32512	uncharacterized protein	FBtr0077246;FBtr0077247;FBtr0332845;FBtr0332846	FBgn0031150;FBgn0031150;FBgn0031150;FBgn0031150	0;0;0;0
461	chr3R	14733008	14733246	239	2.08641	10.2718	94	14724760	14731509	6750	2	FBgn0038256	FBtr0083020	-1499	41784	CG7530	uncharacterized protein	FBtr0336876;FBtr0310554;FBtr0083018	FBgn0011217;FBgn0011217;FBgn0011217	0;0;0
462	chr3L	25133328	25134888	1561	1.5699	10.2712	1526	25120749	25126171	5423	1	FBgn0260008	FBtr0343636	12579	5740185	UQCR-11	Ubiquinol-cytochrome c reductase 11 kDa subunit	NA	NA	NA
463	chr3R	25329078	25329393	316	2.25516	10.2476	230	25323156	25329316	6161	2	FBgn0045761	FBtr0113352	0	43067	CHKov1	CHK domain ov1	FBtr0084849;FBtr0113352	FBgn0039328;FBgn0045761	1810;0
464	chr3R	1366602	1366826	225	1.63097	10.2233	187	1366234	1366601	368	2	FBgn0267798	FBtr0347367	-1	NA	NA	NA	FBtr0392909;FBtr0347367	FBgn0267431;FBgn0267798	0;-1
465	chr2L	21493232	21493818	587	1.66628	10.1906	434	21493562	21493597	36	1	FBgn0053737	FBtr0091735	0	NA	NA	NA	FBtr0091735;FBtr0091842;FBtr0091889;FBtr0091890	FBgn0053737;FBgn0053838;FBgn0053885;FBgn0053886	0;0;0;0
466	chr2R	9552517	9553055	539	2.39383	10.1768	332	9552844	9553764	921	1	FBgn0263660	FBtr0310104	0	NA	NA	NA	FBtr0310104;FBtr0310105	FBgn0263660;FBgn0263660	0;0
467	chr2R	3310247	3311596	1350	1.49146	10.1603	1122	3334854	3336160	1307	1	FBgn0085570	FBtr0302915	-23258	NA	NA	NA	NA	NA	NA
468	chrY	2117938	2118763	826	1.48615	10.1312	176	2266650	2267259	610	2	FBgn0267593	FBtr0347032	148496	NA	NA	NA	NA	NA	NA
469	chr2L	21512312	21512555	244	1.70026	10.126	99	21511728	21512750	1023	1	FBgn0053849	FBtr0091853	584	318854	His1:CG31617	histone H1	FBtr0091853;FBtr0091882	FBgn0053849;FBgn0053878	0;0
470	chr2L	21533059	21533603	545	1.67106	10.0862	365	21533323	21533358	36	1	FBgn0053745	FBtr0091743	0	NA	NA	NA	FBtr0091743;FBtr0091866;FBtr0091873;FBtr0091874	FBgn0053745;FBgn0053862;FBgn0053869;FBgn0053870	0;0;1007;-4
471	chr3R	17401736	17401938	203	2.31825	10.0794	71	17396666	17401454	4789	2	FBgn0038504	FBtr0339532	-282	42093	Sur-8	Sur-8	FBtr0083448;FBtr0083447;FBtr0339531;FBtr0339532;FBtr0112474;FBtr0333932	FBgn0038504;FBgn0038504;FBgn0038504;FBgn0038504;FBgn0085308;FBgn0085308	-282;0;0;-282;1350;1350
472	chrX	23240147	23240517	371	1.52262	10.0669	253	23239718	23240975	1258	1	FBgn0085771	FBtr0346896	429	NA	NA	NA	FBtr0346896	FBgn0085771	0
473	chr2R	3308898	3309162	265	1.49164	10.0407	83	3334854	3336160	1307	1	FBgn0085570	FBtr0302915	-25692	NA	NA	NA	NA	NA	NA
474	chrY	2703370	2703767	398	1.5095	10.0201	175	2593622	2595311	1690	1	FBgn0259855	FBtr0300152	109748	NA	NA	NA	NA	NA	NA
475	chrY	2117004	2117462	459	1.48105	9.98403	170	2266650	2267259	610	2	FBgn0267593	FBtr0347032	149797	NA	NA	NA	NA	NA	NA
476	chr3R	23601545	23601794	250	2.25007	9.97593	166	23601333	23601455	123	2	FBgn0051143	FBtr0084482	-90	NA	NA	NA	FBtr0084482	FBgn0051143	-90
477	chr2R	14267868	14268089	222	2.2902	9.96846	128	14261206	14267919	6714	2	FBgn0033919	FBtr0301203	0	36586	CG8547	uncharacterized protein	FBtr0301204;FBtr0301203;FBtr0339968	FBgn0033919;FBgn0033919;FBgn0033919	-371;0;0
478	chr2R	5051528	5051747	220	1.51644	9.93825	177	5065237	5070210	4974	2	FBgn0013348	FBtr0310003	18463	35473	TpnC41C	Troponin C at 41C	NA	NA	NA
479	chr3R	29457257	29457478	222	2.41339	9.93321	95	29457570	29486704	29135	1	FBgn0004369	FBtr0085422	-92	43469	Ptp99A	Protein tyrosine phosphatase 99A	FBtr0303148;FBtr0085422;FBtr0085424	FBgn0004369;FBgn0004369;FBgn0004369	0;0;0
480	chr3L	639510	639973	464	1.58603	9.92919	385	639714	642332	2619	1	FBgn0263039	FBtr0333724	0	NA	NA	NA	FBtr0306918;FBtr0333725;FBtr0333724	FBgn0263039;FBgn0263039;FBgn0263039	0;0;0
481	chr3R	15984762	15984962	201	2.07109	9.92032	89	15986152	16004081	17930	1	FBgn0003507	FBtr0100595	-1190	41944	srp	serpent	NA	NA	NA
482	chr2R	3308190	3308428	239	1.53404	9.9073	191	3334854	3336160	1307	1	FBgn0085570	FBtr0302915	-26426	NA	NA	NA	NA	NA	NA
483	chr3L	17737159	17737428	270	1.66051	9.88213	140	17740540	17742540	2001	1	FBgn0036749	FBtr0075187	-3112	39973	CG7460	uncharacterized protein	FBtr0075186	FBgn0052183	0
484	chr3L	23113780	23114031	252	1.64387	9.84248	213	23126025	23132209	6185	1	FBgn0053217	FBtr0070045	-11994	2768951	CG33217	uncharacterized protein	NA	NA	NA
485	chr2L	23512973	23513550	578	1.40299	9.83696	174	23415916	23416153	238	1	FBgn0085664	FBtr0304148	97057	NA	NA	NA	NA	NA	NA
486	chr3R	21021484	21021867	384	1.57263	9.82523	292	21021044	21024163	3120	2	FBgn0046763	FBtr0084047	2296	50050	CG17278	uncharacterized protein	FBtr0084047	FBgn0046763	0
487	chr3L	20198036	20198390	355	2.17099	9.81464	159	20149614	20198317	48704	2	FBgn0261556	FBtr0302712	0	40205	CG42674	uncharacterized protein	FBtr0302712;FBtr0302713;FBtr0302714;FBtr0302715;FBtr0302716;FBtr0332698	FBgn0261556;FBgn0261556;FBgn0261556;FBgn0261556;FBgn0261556;FBgn0261556	0;0;0;0;0;0
488	chr3L	12490155	12490357	203	2.14646	9.79202	86	12490294	12491196	903	1	FBgn0267241	FBtr0346431	0	NA	NA	NA	FBtr0075976;FBtr0332645;FBtr0332646;FBtr0332647;FBtr0346431	FBgn0036288;FBgn0036288;FBgn0036288;FBgn0036288;FBgn0267241	-80;-80;0;0;0
489	chrX	23404774	23405509	736	2.18904	9.76782	367	23291700	23291729	30	1	FBgn0267524	FBtr0346898	113074	NA	NA	NA	NA	NA	NA
490	chr2L	1948230	1948449	220	2.02146	9.75199	137	1945815	1946728	914	2	FBgn0053673	FBtr0307516	-1502	3772423	CG33673	uncharacterized protein	NA	NA	NA
491	chr3L	8091757	8091961	205	2.35242	9.73474	85	8087635	8091786	4152	2	FBgn0035833	FBtr0076738	0	38893	CG7565	uncharacterized protein	FBtr0076738;FBtr0304998;FBtr0333948;FBtr0304993;FBtr0304996	FBgn0035833;FBgn0262579;FBgn0262579;FBgn0262579;FBgn0262579	0;0;0;0;0
492	chr3L	640127	640644	518	1.59695	9.63096	172	639714	642332	2619	1	FBgn0263039	FBtr0333724	413	NA	NA	NA	FBtr0306918;FBtr0333725;FBtr0333724	FBgn0263039;FBgn0263039;FBgn0263039	0;0;0
493	chr2L	21423241	21423487	247	1.67772	9.61013	95	21423014	21423608	595	2	FBgn0061209	FBtr0085927	121	326273	His2B:CG17949	histone H2B	FBtr0085892;FBtr0085893;FBtr0091725;FBtr0085927	FBgn0051617;FBgn0051618;FBgn0053727;FBgn0061209	0;0;0;0
494	chr2L	21513455	21514028	574	1.65019	9.58771	227	21513749	21513784	36	1	FBgn0053741	FBtr0091739	0	NA	NA	NA	FBtr0091739;FBtr0091854;FBtr0091881;FBtr0091882	FBgn0053741;FBgn0053850;FBgn0053877;FBgn0053878	0;0;850;0
495	chr3R	8902678	8902920	243	1.466	9.58132	171	8827498	8931896	104399	2	FBgn0262614	FBtr0305301	28976	41062	pyd	polychaetoid	FBtr0305301	FBgn0262614	0
496	chrX	14048111	14048313	203	1.73474	9.57667	44	14048011	14048734	724	2	FBgn0053246	FBtr0300095	421	2768905	Ste:CG33246	Ste:CG33246	FBtr0300095	FBgn0053246	0
497	chr4	320753	321055	303	1.59353	9.55805	138	314923	331387	16465	1	FBgn0052850	FBtr0333680	5830	318246	CG32850	uncharacterized protein	FBtr0089123;FBtr0333680	FBgn0052850;FBgn0052850	0;0
498	chr2R	2357853	2358230	378	1.63783	9.53759	248	2374631	2375134	504	1	FBgn0058100	FBtr0302913	-16401	NA	NA	NA	NA	NA	NA
499	chr2L	16041883	16042085	203	2.37568	9.52965	110	16042047	16048626	6580	1	FBgn0000182	FBtr0080803	0	34946	BicC	Bicaudal C	FBtr0080803;FBtr0343726;FBtr0343727;FBtr0344489	FBgn0000182;FBgn0028644;FBgn0028644;FBgn0266459	0;41592;41363;0
500	chr2L	21524415	21524646	232	1.63882	9.51041	174	21524399	21524926	528	2	FBgn0053873	FBtr0091877	280	41773	His4r	Histone H4 replacement	FBtr0091860;FBtr0091861;FBtr0091877	FBgn0053856;FBgn0053857;FBgn0053873	917;-306;0
