# Supplementary material for: Lola regulates Drosophila adult midgut homeostasis via non-canonical hippo signaling
Source: eLife. 2020 Jan 14;9:e47542. doi: 10.7554/eLife.47542 (PMC7299341; doi:10.7554/eLife.47542)
Supplement: Supplementary file 2. [file elife-47542-supp2.xlsx]

## Sheet: sub_padj_count
gene_name	control 1#	control 2#	wts RNAi 1#	wts RNAi 2#	lola RNAi 1#	lola RNAi 2#	yki 1#	yki 2#
14-3-3epsilon	10891	11419	17520	16184	16891	15879	20616	22177
18SrRNA-Psi:CR41602	133	8	132	3	4	7	7	1
28SrRNA-Psi:CR45848	57	2	7	1	1	5	2	1
28SrRNA-Psi:CR45859	123	4	134	1	3	5	11	12
7B2	171	193	194	191	368	268	88	121
7SLRNA:CR32864	27	3	0	0	0	0	1	0
AANATL2	202	265	187	135	22	39	324	458
ABCB7	1694	2229	2102	1567	1760	1470	1402	1619
ACC	1473	1757	3502	2159	3488	2182	4077	5718
AGBE	686	726	902	650	875	702	1458	1598
AGO1	2332	2830	5283	3388	3938	3474	5442	6215
AGO3	34	22	197	111	192	165	83	405
AOX1	27499	25241	38917	24434	60936	44463	34409	48273
AOX3	4902	5129	8747	7637	13613	11761	5967	7928
AP-1gamma	2178	2575	4146	3308	3255	3379	4591	5186
AP-2alpha	1236	1247	1827	1485	1481	1303	2455	2678
APC7	13	13	15	20	16	9	27	211
ATP8B	403	536	1799	1044	512	573	1809	2052
ATPsynCF6	5232	7441	7103	6840	8668	8383	5133	5658
Abi	589	593	963	953	878	744	1080	1452
Abl	226	155	375	218	269	220	451	612
Ac13E	739	995	1782	1091	1085	1020	2097	1941
Ac76E	277	289	1108	447	519	354	455	612
Ace	225	378	552	382	223	118	492	719
Ack	202	210	345	294	250	181	520	621
Ack-like	324	391	550	378	495	424	726	835
Acox57D-d	2752	5514	5791	4051	1483	1708	3954	3278
Acsl	15726	28153	22627	18861	27851	26603	16329	15604
Act42A	9068	5747	11899	15981	11019	8099	25752	25705
Act87E	1149	1299	1317	2426	1920	1174	909	1142
Ada1-1	1	3	48	35	34	27	1	3
Adar	586	682	1057	740	797	790	1181	1406
Adgf-A2	47	44	125	108	65	111	250	241
Adi1	3009	4368	3005	1993	4255	4203	2285	2730
AdipoR	5279	5938	6000	4820	9719	7245	4067	4377
Adk3	879	905	912	1102	1772	1532	891	1007
Ady43A	189	296	296	390	569	1136	388	707
Ag5r	3109	1319	5121	2778	9605	4973	1066	2690
Ag5r2	6170	7052	8540	8818	17025	12562	10230	7733
Akap200	5818	5882	10544	8934	7082	6133	19169	18942
Alh	486	653	1676	1198	1018	699	2476	2625
Alr	291	220	217	243	879	712	197	238
Amun	1206	1173	1940	1557	1658	1285	2154	2733
Amy-d	7637	5327	72174	54559	42492	17424	42749	42904
Amy-p	39849	25749	81927	65340	52843	18913	143614	176879
Amyrel	10	34	41	17	192	93	233	559
AnxB10	389	201	569	757	256	183	874	1172
AnxB11	467	421	435	415	817	502	321	409
AnxB9	2595	2073	3819	4221	4249	3155	7045	10081
Apc	1114	1529	5164	3039	2154	1803	5785	6036
Aprt	507	556	821	843	1311	1276	646	663
Arc1	5933	6520	7681	5902	11670	8037	13096	13818
Arc2	476	278	192	159	151	124	207	198
Archease	405	423	429	346	594	536	321	344
Arp2	4787	5224	8677	6704	7226	6553	9269	9615
Asap	1281	1753	4058	2292	1967	1985	3926	4161
AsnS	901	449	2058	1348	155	178	2232	2771
AspRS-m	1159	1213	2048	1718	1509	1574	2634	2637
AstA	505	536	568	515	754	716	427	444
AstC	3027	3581	1983	1717	2732	2536	1864	1718
Asx	352	394	610	365	487	450	706	870
Atf3	1424	2173	5897	3920	3544	3538	4937	5636
Atg1	932	949	1361	906	1388	1014	1926	2275
Atg2	1005	1201	1972	1090	1645	1348	2030	2417
Atg4b	348	382	782	472	744	595	735	808
AttC	4	0	0	2	125	61	1	3
Atx2	645	717	1088	936	1048	845	1752	1990
B4	736	785	1841	1063	1165	943	1625	1944
BRWD3	429	464	999	511	634	483	1016	1291
Bace	323986	549373	479432	389571	657126	570162	168219	178020
Baldspot	4128	5246	10310	7567	6262	5342	9209	9996
Best1	939	1159	2865	1811	1250	1521	1455	1637
BigH1	0	0	2	4	7	8	30	239
BoYb	1	1	1	1	0	1	5	66
Br140	159	151	253	202	237	200	337	425
Bruce	2700	3087	7209	2900	4174	3674	6984	7767
BtbVII	546	776	1220	865	1044	808	1272	1587
BthD	13	11	13	27	6	8	40	90
Btnd	108	209	423	224	476	739	560	938
BubR1	51	35	50	68	50	28	107	199
Burs	211	145	147	117	139	108	94	96
CAH1	832	1136	1082	703	885	827	727	736
CAP	2067	2432	5279	3334	3449	3456	4208	5221
CASK	897	1021	1881	1417	1671	1315	1765	2253
CCHa1	273	226	258	244	458	339	174	208
CCHa2	1433	1361	2062	1052	2596	1910	927	972
CG10000	314	208	514	391	294	167	645	757
CG10011	224	273	963	531	321	277	1591	1873
CG10051	680	582	436	433	2733	2039	644	360
CG10062	1232	1016	770	497	883	813	1171	874
CG10126	354	324	206	186	149	272	403	519
CG10132	28	29	35	32	160	107	32	31
CG10163	42	154	94	70	49	69	24	17
CG10165	1219	1509	1781	1508	2307	2189	1063	1105
CG10177	28	37	25	10	69	57	3	6
CG10178	594	1044	629	1229	258	727	3644	2992
CG10182	4934	10734	7411	3903	9818	12351	1914	1631
CG10189	349	254	157	144	198	178	121	172
CG10254	281	267	328	253	311	266	487	1324
CG10283	112	75	175	125	130	85	214	322
CG10344	364	204	322	288	105	152	281	222
CG10352	84	72	212	235	172	156	390	453
CG10353	1601	1761	1691	1047	1573	1160	1440	1725
CG10365	636	695	396	333	620	493	310	381
CG10376	463	538	811	705	1094	988	826	858
CG10425	2231	2208	2231	1834	2010	1766	2354	2040
CG10433	245	234	392	443	617	500	281	444
CG10467	1367	1977	3295	2510	2014	2759	3600	4776
CG10470	702	826	813	802	1036	864	603	583
CG10476	0	2	5	4	52	29	0	0
CG10477	13455	14790	7433	7019	16467	12160	14228	16762
CG10505	1317	2890	2499	1967	973	1030	1832	1307
CG10512	499	644	584	430	706	504	425	487
CG10543	303	425	641	418	574	416	778	878
CG10550	2140	3020	3121	2442	5964	6961	1700	1624
CG10555	178	188	312	288	241	229	511	638
CG10559	415	268	506	522	23	13	966	1109
CG10562	3021	3466	4844	3681	703	1013	6038	5387
CG10592	17088	19022	15088	14596	8528	9187	9886	8645
CG10600	1187	1291	3487	1899	2191	1971	3401	3789
CG10631	271	262	695	283	434	343	746	870
CG10659	3907	4041	4042	3175	4794	3850	3129	3201
CG10680	74	28	46	65	248	161	42	93
CG10725	502	245	28	7	37	13	2	2
CG10737	779	956	1954	1531	1429	1182	1419	2104
CG10738	43	61	107	100	160	175	52	66
CG1077	21	35	132	104	31	40	222	216
CG10778	720	622	958	963	914	724	496	601
CG10827	9458	10481	9588	9942	9495	8262	8594	8301
CG10863	1634	2432	2797	2102	783	1222	1815	1944
CG1090	57	67	14	8	73	42	8	15
CG10910	13051	8268	28358	20397	13646	10506	28737	24108
CG10924	798	1408	947	690	1894	1324	688	623
CG10939	868	1072	1444	1031	1500	1176	1623	2403
CG10947	92	156	243	202	468	256	236	234
CG10960	1252	1634	3467	3728	3429	2898	5527	4368
CG10973	494	299	559	531	448	426	232	283
CG11029	33	87	440	221	657	206	29	150
CG11034	6283	8103	11072	8780	14824	13496	9326	8096
CG1105	322	365	591	500	433	451	681	753
CG11050	5886	3971	4232	3554	3685	2992	3541	3174
CG11076	1172	1209	1270	1258	1623	1147	977	1176
CG11122	148	96	346	153	164	116	435	554
CG11125	74	118	311	167	181	192	273	325
CG11141	308	307	696	634	490	324	518	533
CG11168	694	845	1396	1056	977	942	1594	1675
CG11178	452	522	750	586	412	349	681	772
CG11192	56	48	229	110	40	28	128	146
CG11200	1051	1914	1832	1331	850	787	877	868
CG1124	162	277	906	381	2375	627	54	374
CG11261	513	492	690	615	119	92	585	615
CG11267	1059	1400	1469	1740	1363	1509	960	1199
CG11279	232	333	293	220	423	343	182	203
CG1129	2809	2965	6558	6147	4704	4196	5464	5861
CG11318	1658	1694	3876	3894	2536	2746	4406	5230
CG11384	312	287	490	265	716	582	455	486
CG1139	339	344	365	211	1460	971	468	652
CG11400	525	301	1038	479	1863	494	76	151
CG11407	190	228	339	142	178	217	784	528
CG11426	454	594	742	470	455	423	1198	1505
CG1143	1103	650	724	532	612	336	122	420
CG11448	820	845	1541	1092	1261	985	1480	1830
CG1146	474	574	1254	1025	850	832	919	1056
CG11505	927	994	2290	1373	1545	1255	3101	3217
CG11576	1359	1626	1826	1467	3966	3298	1638	1797
CG11656	28	20	59	41	33	41	115	96
CG11659	40	36	13	34	11	77	143	221
CG11672	3586	1163	7269	3401	8707	2020	709	1283
CG11674	0	1	2	4	3	4	11	207
CG11741	251	89	79	65	24	44	86	73
CG11873	256	259	698	288	379	263	647	865
CG11878	5822	5128	10876	7147	13383	17747	5473	10428
CG11883	102	130	150	112	44	49	107	196
CG11893	2049	3345	39	39	35	43	1109	1438
CG11897	1721	1790	1520	1112	1309	1825	1727	2680
CG11911	48007	62988	72143	62262	87767	71062	22830	19629
CG11912	4192	3688	5278	4667	32197	25755	3254	2454
CG11920	252	220	219	185	232	155	148	175
CG12057	45596	79765	80317	77730	117124	99251	27748	27724
CG12065	1893	1973	3730	3073	2167	1975	4632	5462
CG1208	921	868	1811	713	2159	848	2551	2272
CG12163	4519	5925	4983	3466	4948	3549	5649	7341
CG12171	2702	3310	3149	2734	5824	4822	1809	2453
CG12177	429	340	373	301	507	429	223	281
CG12194	1446	1980	1524	1159	2109	1476	1363	1191
CG12224	565	312	447	183	325	420	178	232
CG12288	186	180	139	130	119	91	182	224
CG12338	1783	2283	1354	1063	1919	1488	1847	1966
CG12343	367	410	398	304	455	388	302	330
CG12374	853892	1582743	841813	740755	957898	897194	309988	239571
CG12395	12	31	6	4	89	41	3	4
CG12402	34	54	55	34	228	170	38	69
CG12470	13	12	0	0	0	0	0	2
CG12490	47	217	24	28	52	78	3	2
CG12493	140	139	194	157	347	329	178	208
CG12502	1	3	83	47	5	6	10	9
CG12512	616	1165	488	456	433	764	663	905
CG12643	893	895	436	309	588	497	61	82
CG12708	0	0	0	0	33	34	0	1
CG12730	344	383	484	339	286	260	536	474
CG12780	5721	4132	11300	6800	2887	2924	9281	10353
CG12824	1015	991	733	728	219	513	987	986
CG12825	5740	6719	5917	5547	4345	5431	5477	4803
CG12868	748	929	727	607	647	704	640	607
CG12929	187	225	128	118	171	149	113	125
CG12970	289	266	127	575	92	88	859	614
CG13012	123	184	60	115	84	94	22	28
CG13067	449	449	479	298	538	366	325	329
CG13075	132	49	164	100	947	1121	92	114
CG13078	490	240	761	1213	848	642	182	124
CG13085	207	231	253	154	260	270	144	185
CG13101	47	67	130	95	183	205	95	164
CG13117	369	299	597	607	309	466	1264	1501
CG13124	1008	1072	2074	1520	1380	1165	2275	2594
CG1315	1303	1736	1703	1517	2630	2517	895	1235
CG13160	217	158	259	159	801	686	244	171
CG13164	0	0	28	7	19	15	0	0
CG13185	780	743	1815	785	1387	948	1386	1786
CG13215	194	102	129	65	43	24	15	87
CG13250	6	14	31	11	6	12	60	64
CG13252	1089	1045	2042	1878	2727	2930	3197	3320
CG13284	2342	2586	3035	2169	5020	3497	1996	1847
CG13285	455	298	617	334	258	142	261	364
CG13300	33	17	86	94	28	9	130	223
CG13315	17946	25104	24277	11708	18349	13544	15988	16112
CG13321	17668	16380	34170	29870	29408	20126	21318	25608
CG13360	1440	1274	3897	2149	5141	3536	1027	1786
CG13364	975	1213	1197	883	1322	1117	701	742
CG13366	883	838	1737	1260	1308	1068	2003	2404
CG13375	95	50	79	38	50	32	28	35
CG13397	255	321	178	109	102	141	115	350
CG13482	4015	5909	13736	8280	6724	5686	9376	9300
CG13488	253	221	628	673	166	222	1525	1713
CG13492	27132	28329	66098	35234	44002	34676	64713	56682
CG13506	3158	2937	6200	5077	4232	4021	6495	6612
CG13551	4580	4996	6046	6026	10557	8050	5598	6074
CG13562	14	17	14	11	131	97	9	16
CG1358	498	691	617	600	597	496	421	402
CG13658	1756	2126	1590	1379	2273	2735	1489	1639
CG13659	1134	1331	1169	922	241	381	1241	1171
CG13690	10	9	39	41	25	14	53	92
CG13698	69	62	113	97	110	106	170	257
CG13704	3555	3621	7430	6503	6668	5619	6480	7531
CG13806	68	26	350	141	335	89	88	230
CG13813	224	270	2	3	0	0	42	17
CG13829	10	13	68	48	28	21	37	35
CG13895	158	156	282	196	367	322	231	214
CG13905	447	846	112	811	655	3411	216	442
CG13912	364	730	646	624	499	510	202	226
CG13992	0	0	0	0	1	0	3	54
CG14120	10008	13720	6989	6558	15915	17468	11795	8405
CG14125	13245	8314	30404	15174	43429	9898	3179	8150
CG1416	1705	1168	2460	2551	1839	1708	1009	1335
CG14160	1090	939	1275	1001	989	721	753	749
CG14200	374	456	874	532	622	498	921	1165
CG14205	2008	3581	9885	5324	7078	8004	1526	1357
CG14210	170	163	170	122	208	148	89	138
CG14219	547	292	2115	770	1112	987	638	905
CG14245	171	340	328	514	308	1081	530	1989
CG14438	433	392	890	497	538	403	965	1196
CG14440	259	230	296	252	122	167	262	311
CG14441	593	675	1315	717	1148	1005	1274	1476
CG14457	967	1316	830	669	950	716	1207	1074
CG14499	7448	1538	2582	17856	133	38	7023	4829
CG14500	2083	965	4114	3852	2649	2270	5057	3763
CG14528	39	39	63	31	778	313	26	48
CG14545	1	0	2	3	4	8	11	196
CG14629	4035	6164	5687	5021	8239	7727	3435	3587
CG14661	88	60	80	48	41	27	15	42
CG14671	575	523	596	507	679	669	445	523
CG1468	54	24	50	134	124	347	40	56
CG14688	734	381	925	665	2432	1118	461	351
CG14695	182	183	47	46	17	34	63	89
CG14696	222	165	209	409	200	188	499	477
CG14715	348	457	309	285	313	287	204	196
CG14767	2161	2838	3213	2682	5716	4329	3452	4258
CG14818	1861	1939	1881	1770	2702	2670	1384	1766
CG14820	5432	9787	3347	3154	6837	8267	3502	2487
CG14855	57	58	27	20	418	323	33	43
CG14856	35	67	34	29	320	293	37	33
CG14879	1033	1105	2420	1537	1397	1206	2839	2950
CG14906	350	212	198	156	242	262	133	197
CG14931	0	0	0	0	1	4	6	29
CG14945	59	58	104	101	181	421	107	222
CG14949	1306	655	914	605	442	238	168	702
CG14977	211	252	254	196	269	265	157	179
CG14989	1130	1336	1394	724	2057	1646	541	629
CG15019	1152	1221	1437	1008	1562	1183	721	765
CG15027	279	320	293	241	386	236	233	262
CG15044	3755	3730	6736	5236	4106	5383	3238	3959
CG15067	53	12	12	28	277	232	37	42
CG15083	309	255	373	371	409	283	603	663
CG15096	9402	5381	4219	4606	7270	3537	2404	2793
CG15099	1776	2340	4535	2646	3134	2535	5869	5877
CG15126	38	39	205	126	31	34	73	67
CG15170	1722	2105	2139	1582	2203	2212	1653	1614
CG15202	25	89	233	225	24	34	115	224
CG15209	2219	3577	1778	1354	1862	1776	1111	1080
CG15210	1429	1249	3164	2373	3045	2605	4441	4497
CG15249	0	0	3	1	17	12	0	1
CG15254	2612	3231	1482	1217	1184	1666	1169	825
CG15293	107	46	65	87	407	330	110	235
CG1532	2894	4465	3346	3584	3766	3928	1847	1626
CG15394	73	32	27	14	17	12	13	38
CG15408	69	208	229	317	138	694	372	922
CG1542	547	594	533	450	714	461	406	570
CG15431	139	148	413	328	285	180	249	421
CG15529	25	23	74	65	31	21	122	159
CG15533	1696	2161	3775	2242	3366	1989	8253	5184
CG15534	4844	5472	1808	650	422	376	2131	2560
CG15544	40	34	133	64	176	113	174	181
CG15556	248	252	580	433	698	754	215	508
CG15611	1360	1394	1823	1518	745	944	2094	2128
CG15649	21	24	73	49	217	63	1	12
CG15661	235	248	218	100	112	110	201	203
CG15695	249	212	262	268	56	37	1189	853
CG15715	1276	1624	1377	1163	2156	1885	1226	1252
CG15721	0	0	0	0	0	0	6	67
CG15744	95	109	186	124	104	111	242	310
CG15766	90	97	142	101	22	22	23	30
CG1578	652	663	951	635	845	682	1159	1470
CG15814	2011	2380	3677	2807	4710	3738	3167	3248
CG15818	7995	5343	3516	2285	4799	2354	7288	9577
CG1582	1147	1005	1150	987	1243	1099	860	1092
CG15865	817	897	1461	1270	2422	1679	909	1144
CG15877	152	104	65	77	76	59	59	76
CG15879	658	1196	728	717	359	533	472	485
CG1637	2718	2921	4054	3501	5438	3955	5439	6915
CG1657	625	828	1067	795	1055	725	1395	1659
CG1665	328	522	413	335	109	206	456	481
CG16700	997	1029	317	253	588	527	261	513
CG16713	415	237	207	72	283	165	49	120
CG16723	454	514	102	68	245	291	91	82
CG16727	168	567	657	641	227	822	1108	2337
CG16758	139	140	361	224	743	367	333	303
CG16791	632	459	1116	962	757	585	1948	2142
CG16826	13530	275	35	14	5646	9055	2833	12380
CG16868	309	299	564	458	462	386	650	725
CG16898	2330	1705	2009	807	844	1129	1087	1400
CG16959	64	42	224	160	95	40	174	233
CG1698	2057	1009	1071	1356	985	1121	460	524
CG16985	345	397	995	733	695	604	936	877
CG16986	3255	3886	11389	11239	6476	5037	12416	13386
CG17018	12	8	5	6	22	41	83	663
CG17019	1405	1538	2581	2006	2302	1784	2715	2979
CG17059	159	169	136	90	151	200	90	80
CG17147	26	8	26	31	286	258	10	14
CG17167	2555	4502	3851	3111	4725	4620	2641	2566
CG17192	26325	56198	23536	21313	41604	53728	18065	6565
CG17219	193	174	159	128	200	124	96	120
CG17224	2537	2036	3149	3821	2069	1610	3111	2708
CG17270	167	123	159	155	88	71	142	170
CG17272	1278	1442	1370	1189	1115	1106	2341	2477
CG17292	521	795	988	912	1232	1080	291	407
CG17322	22	35	76	51	93	107	37	84
CG17337	4705	5920	5845	5526	14565	13291	5925	5612
CG17475	4293	6946	6047	4020	6869	8161	3816	3713
CG17477	187	231	227	145	183	187	137	103
CG17544	9499	12809	9801	9501	7836	8216	8614	7980
CG17570	441	419	252	203	200	205	263	207
CG17571	20447	17205	23256	26404	44408	34952	6801	9600
CG17597	9139	11488	9494	8980	10387	9530	8039	7267
CG17633	63000	92645	90379	97522	120925	107814	62100	61409
CG17646	129	189	200	339	307	628	314	676
CG17698	763	894	1073	1093	355	416	1278	1403
CG17734	2267	2048	2274	2156	2529	2362	1646	1703
CG1774	956	1585	1633	1292	3881	3669	628	955
CG17746	991	1100	1584	1422	2068	1849	1417	1633
CG17751	91	140	130	104	36	276	301	725
CG17754	465	584	649	536	881	638	1019	1343
CG17841	2733	4654	5894	4674	12494	10042	3599	5112
CG1789	355	293	342	240	340	224	202	228
CG17928	373	465	553	394	232	219	598	448
CG18012	1441	1715	1636	1165	2167	1455	1136	1510
CG18067	524	364	546	363	1861	1058	1014	1140
CG18171	39	70	281	129	128	86	318	409
CG18179	1219	789	983	1926	638	361	1302	1036
CG18404	20762	34521	14082	12772	35386	29765	18048	20559
CG18417	598	1449	1181	984	1941	1681	548	538
CG18446	76	56	16	13	12	12	41	98
CG18508	763	796	673	662	847	774	642	629
CG18549	547	699	533	447	2756	1806	540	664
CG18577	811	1187	934	848	1245	922	528	516
CG18607	131	187	8	8	64	41	35	37
CG18622	735	593	445	415	545	495	350	329
CG18635	1115	1273	2232	1560	1689	1593	2571	2684
CG18659	624	647	1614	1103	1061	820	1582	1851
CG18731	129	149	81	61	78	84	69	66
CG18747	1669	2368	4892	4009	2781	3334	5136	5011
CG18748	2768	3151	2624	1762	2212	1827	5111	3129
CG18765	218	327	534	560	810	647	855	981
CG18788	94	121	121	100	100	87	38	27
CG1907	1473	1671	2086	1943	3376	2716	1893	2163
CG1927	2433	3044	4153	3280	5921	5000	3181	3042
CG1946	1250	2471	824	744	1094	1155	536	614
CG1979	14	34	83	20	40	46	105	96
CG2003	422	447	566	339	1014	748	341	256
CG2004	850	624	2557	3186	790	644	1586	1739
CG2064	7478	5706	4084	3353	5486	4862	5564	5273
CG2065	421	491	464	301	873	809	344	429
CG2120	419	589	572	467	544	437	336	292
CG2186	351	370	622	445	514	457	780	963
CG2187	175	567	442	1241	620	3084	1037	1995
CG2233	492	196	327	467	1338	1524	610	1505
CG2258	74	91	121	107	64	56	218	331
CG2641	256	184	473	305	715	571	463	417
CG2765	5202	5083	4143	3740	6091	4366	2729	2690
CG2767	694	689	1222	1147	820	793	1270	1489
CG2781	748	698	987	633	821	633	507	694
CG2811	925	1063	1206	903	1086	1095	715	675
CG2862	1824	2376	2644	2333	2512	2241	1763	1859
CG2865	899	679	496	383	734	665	814	979
CG2909	569	454	198	191	423	293	317	271
CG2918	4724	5955	11220	14267	7139	6623	7950	9104
CG2926	1098	1080	2232	1209	1457	1183	2402	2732
CG30026	139	47	473	327	611	283	13	24
CG30043	1147	1409	1681	979	4009	3676	742	448
CG30047	1625	2204	2596	1456	2801	2691	1183	1063
CG30049	323	573	997	689	1330	1201	623	515
CG30069	1229	1279	4675	2333	2143	2408	3977	3972
CG3008	1444	1141	773	650	1343	1298	865	923
CG30090	73	82	706	650	23	65	823	1129
CG30122	1650	1687	3270	2118	2449	1903	3244	3824
CG30151	145	103	60	46	15	17	166	204
CG30154	347	221	206	189	160	119	414	408
CG30197	357	228	833	385	1134	347	77	228
CG30265	36	74	29	10	58	35	21	5
CG30289	4	2	8	6	178	162	5	5
CG30339	1299	1855	1397	1083	1935	1928	1067	892
CG3036	4020	7414	4179	4526	4895	5247	2520	1918
CG30377	4	5	1	6	11	12	15	105
CG30438	30	14	158	144	28	38	18	48
CG3045	128	105	111	84	136	76	67	80
CG3071	498	506	551	416	669	430	381	482
CG3091	6217	9404	5554	4219	3253	3293	6126	6012
CG3097	226	155	652	282	1436	333	43	125
CG31041	2638	3370	3796	4537	6679	5348	2990	2103
CG3106	11715	26138	8904	21004	6378	5312	4370	2558
CG31075	161	233	309	221	247	107	406	692
CG31077	1831	1313	10069	4959	8286	2018	611	2284
CG31087	5447	4400	6259	5988	12174	10991	7829	6449
CG31098	3053	2996	3009	3112	3537	3561	1974	2170
CG31104	1941	2845	6050	2724	243	228	3489	5015
CG31183	225	201	554	377	257	307	436	577
CG31224	531	615	1022	782	848	781	1188	1326
CG31229	221	204	198	130	167	175	110	97
CG31233	78301	106292	66428	67787	123364	101787	45640	31116
CG31259	3683	5117	3506	3679	3316	2828	1618	1016
CG31265	2373	3408	2576	1982	3669	3400	1861	1876
CG31266	2526	3630	2916	2314	4328	4474	1517	1466
CG31267	2380	3429	3418	2430	4207	4745	1758	1682
CG31300	2940	4536	5379	2934	842	920	5811	6197
CG31326	37	15	33	35	122	108	24	60
CG31344	208	157	349	419	299	206	652	540
CG31370	743	669	534	383	86	159	677	509
CG31436	564	724	220	189	61	96	534	387
CG31446	3036	3286	2853	2593	1509	1364	3645	3012
CG31549	624	700	663	502	531	444	411	615
CG31633	548	464	505	419	201	213	516	493
CG31635	725	885	1614	932	1140	914	1634	1983
CG31636	1219	1395	1023	675	1057	648	1373	1066
CG31673	1427	1838	2453	2391	612	951	2681	2997
CG31681	0	1	0	0	0	0	12	487
CG31688	292	294	539	236	390	252	651	764
CG31689	572	594	875	679	701	555	1163	1313
CG31729	3087	3925	6669	4482	5285	4910	6601	7134
CG31751	1677	2361	2349	2035	4443	3964	2712	3427
CG31792	52	151	88	114	1065	1510	142	192
CG31793	809	1014	1438	946	2419	2280	1247	1272
CG31798	48	49	131	62	33	39	238	232
CG31808	376	301	357	267	1187	916	187	369
CG31809	90	107	27	28	21	13	12	21
CG31810	332	444	339	324	423	354	35	35
CG31955	336	247	220	173	96	69	331	320
CG31974	7256	5248	6016	4429	4282	3303	4537	4361
CG32066	950	1083	1461	1247	1997	1765	1373	1376
CG32137	2125	2325	4346	2975	4412	3629	3662	4325
CG32170	118	115	199	181	154	119	271	286
CG32181	88	50	205	173	89	107	329	289
CG32182	31	21	95	63	39	49	153	95
CG32196	281	265	275	288	131	161	317	292
CG3224	533	657	580	458	741	618	431	540
CG32264	869	998	1872	1305	1298	1205	2230	2624
CG32276	3036	4364	3866	4243	4400	4433	2875	2485
CG32277	1	1	1	0	0	1	5	87
CG32281	219	182	127	109	148	145	112	119
CG32284	534	145	37	67	689	636	191	147
CG32335	48	35	45	43	27	24	130	142
CG32379	578	931	604	319	477	416	464	361
CG32428	719	906	1864	1369	1678	1668	1295	1744
CG32483	4900	5211	4234	3602	7929	7097	3858	3431
CG32512	1514	1663	967	602	1470	1240	497	522
CG32549	1830	1984	2409	2194	4007	4179	1628	2239
CG32572	27	28	0	0	2	3	2	2
CG32581	360	406	220	217	268	256	355	527
CG32633	5509	7351	9160	8550	19660	14681	5981	5357
CG32641	294	277	151	155	195	195	387	400
CG32669	2789	2550	2326	2453	2139	2196	1407	1329
CG32695	412	445	398	488	624	1039	355	316
CG32750	2289	2318	900	766	1971	1589	950	990
CG32751	258	107	371	360	2201	2966	10	6
CG32758	371	441	840	541	485	469	939	1022
CG32767	292	295	640	313	425	432	706	1020
CG3277	1086	1389	1213	902	1413	976	970	973
CG32813	1137	1277	1921	1294	1764	1348	2254	2511
CG32834	1	7	0	0	0	0	26	668
CG32856	73	83	40	31	25	40	33	50
CG32982	427	386	1651	1202	858	816	1414	1941
CG3301	665	1216	2439	2293	5919	4313	1734	3379
CG33012	54	119	146	160	153	461	310	283
CG33056	450	386	636	477	324	260	650	798
CG33090	433	536	860	657	1256	1431	763	878
CG33109	899	14	4	1	469	864	246	585
CG33111	393	510	925	649	709	618	991	1152
CG33116	865	799	1340	1172	1300	1010	1848	1731
CG33127	11861	12620	15288	14378	10985	9027	9962	10388
CG33169	171	130	206	182	158	172	94	96
CG33177	19	34	8	7	15	16	2	3
CG33181	6365	6809	6430	5387	8159	7572	5703	4545
CG33230	466	401	365	242	413	370	275	280
CG33258	2856	2771	3616	3400	2681	6311	5180	7327
CG33296	21	45	32	11	24	5	9	7
CG33298	1922	1833	3707	2543	2582	2214	4370	4594
CG33301	1337	1963	1335	922	1196	1675	727	829
CG3332	4059	4815	5318	4586	6327	5000	4046	4223
CG33337	361	536	308	219	270	213	371	318
CG33346	4242	5191	12920	8911	17603	14953	8907	8264
CG3335	429	443	485	327	491	322	292	433
CG33468	191	128	71	71	11	5	77	55
CG3348	1962	2308	1038	1278	1162	838	543	573
CG33510	601	366	532	444	456	374	315	317
CG33926	3131	1988	5246	7522	8051	5472	3692	4259
CG33939	18	16	2	2	5	3	1	2
CG33965	847	1461	382	248	1046	1054	1748	1431
CG3397	289	198	100	75	312	356	74	79
CG33993	6	14	34	25	129	49	9	27
CG34005	371	187	167	256	103	133	374	307
CG34026	3829	3696	8721	5952	5308	5420	6384	6220
CG34040	1556	958	3895	1200	2245	714	3479	7859
CG34126	747	853	1480	956	1262	1031	1507	1654
CG34176	3975	4249	5948	4646	3372	3114	3787	4115
CG34198	857	541	1422	770	629	528	1936	1617
CG34200	228	319	185	175	287	324	159	172
CG34215	98	175	4	5	11	3	3	3
CG34220	47116	40497	175947	81112	278950	54199	5126	11645
CG34228	353	455	378	311	373	497	277	238
CG34236	758	672	894	1111	614	537	1395	1404
CG34269	28	63	16	9	75	63	15	9
CG34288	1187	1273	1416	953	1262	1234	1041	849
CG34324	16798	12476	53160	25363	93845	19891	1371	3541
CG34330	16330	17610	20451	19394	25101	22339	14598	16661
CG34386	475	787	433	429	667	580	466	385
CG34394	2270	2847	5875	4577	4392	3151	4173	4633
CG34398	115	87	212	66	443	264	87	207
CG34401	240	247	664	316	357	282	870	987
CG34408	620	710	1367	1016	1180	833	1284	1483
CG34417	2368	3560	8937	5782	7063	6973	9166	12180
CG34449	528	633	1049	690	933	817	1091	1253
CG34451	4	3	446	389	806	920	5	12
CG34452	42	37	180	104	343	175	18	21
CG34457	14	31	10	9	11	10	3	5
CG3457	0	0	1	0	2	1	9	34
CG3558	894	995	1665	1287	1462	1209	1921	2120
CG3568	150	143	82	42	82	55	68	67
CG3604	286	137	164	43	75	33	66	212
CG3609	2884	3105	4813	2958	9311	4562	6540	9451
CG3625	2017	3164	1918	1718	2548	2687	1166	1054
CG3630	11	18	120	105	73	59	17	36
CG3635	389	607	795	535	584	573	173	193
CG3638	610	582	1464	933	1115	834	2134	2817
CG3655	689	859	1016	881	1568	1757	1140	1369
CG3699	1061	1276	1970	1596	2849	2004	1291	2511
CG3706	2166	2663	4360	4340	2874	2864	1772	2572
CG3726	206	278	539	325	336	260	547	762
CG3734	8514	11786	10806	8981	11405	10063	8821	6794
CG3739	6775	5173	10774	6631	4336	2338	18161	19121
CG3760	1566	1684	1672	1574	2335	1808	1372	1507
CG3770	53	53	110	99	90	45	136	195
CG3819	7409	5358	1042	506	1503	760	1411	1520
CG3829	259	300	212	151	332	294	181	254
CG3841	8759	13584	7434	8402	8837	9217	6197	5678
CG3906	11676	5315	26584	15336	33607	7089	932	2924
CG3940	2337	3392	4837	3512	3958	4272	1784	1720
CG3961	1863	3177	1581	1165	2716	2378	1277	1471
CG40178	534	493	380	310	376	383	547	622
CG40191	1458	1524	1841	1624	2952	3019	1735	1571
CG40439	55	38	149	400	54	426	55	50
CG40486	200	281	213	147	247	140	128	138
CG40498	17	19	23	17	114	107	11	21
CG4053	1343	2165	1547	1026	1042	1183	948	920
CG41128	547	755	596	502	483	695	382	296
CG4210	577	611	413	276	429	501	286	331
CG42232	456	263	745	438	432	398	970	1035
CG42240	1431	1166	4543	2497	2656	2864	2897	4024
CG42249	12522	17662	12157	10496	15361	13342	7906	7244
CG42268	603	599	1855	1005	376	524	1516	1758
CG42269	33	29	61	16	118	90	16	86
CG42321	1440	1622	3201	2557	2624	2700	4245	4835
CG42324	82	108	97	201	115	347	185	394
CG42336	2999	3939	3451	3353	5095	4584	2991	2970
CG42389	904	742	2879	1960	1082	706	2772	3176
CG42394	524	602	1029	1051	1095	1860	1071	1102
CG42445	211	235	261	205	57	108	220	256
CG42495	73	88	229	229	252	239	144	132
CG4250	21	23	17	26	133	96	28	52
CG42514	752	877	825	605	984	887	467	438
CG42586	0	0	0	0	17	19	0	0
CG42656	283	173	294	131	41	48	48	144
CG4266	607	618	1208	785	869	659	1239	1405
CG42684	561	731	1402	959	1160	894	1655	1923
CG42714	353	436	1043	603	589	584	732	1008
CG42724	737	616	1231	833	875	774	1278	1584
CG42728	64	52	10	5	194	56	16	9
CG42747	42	28	104	134	53	50	195	278
CG42748	2509	3183	5209	3324	5106	4021	5358	6351
CG42788	188	157	346	359	295	201	473	554
CG42797	158	153	287	202	218	207	297	472
CG42806	417	392	449	374	463	415	238	251
CG4302	4321	5167	3397	2632	3644	3729	5293	4604
CG43055	5633	6487	3691	3840	4088	2479	10605	10985
CG43066	351	314	608	513	506	370	720	801
CG43074	18	21	1	1	0	0	79	695
CG43090	8	3	1	0	6	6	48	516
CG43102	132	214	273	309	212	502	437	689
CG43103	31	24	90	58	8	3	65	50
CG43120	591	481	1085	1326	114	66	1699	1449
CG43134	74	54	371	188	521	183	185	870
CG43143	561	678	1647	1216	994	682	1903	2292
CG43187	231	220	444	545	129	139	894	825
CG43208	34	65	53	53	51	73	20	15
CG43218	24	22	72	58	17	21	96	90
CG43294	11	3	33	16	2	0	129	141
CG43340	2542	3329	4919	3589	6433	5737	5158	5452
CG43348	375	180	830	287	402	389	985	791
CG43367	1069	1229	3895	1871	2194	1979	5511	5073
CG43427	5038	6596	11593	8186	6484	6922	12569	12645
CG43446	132	174	137	101	88	87	165	124
CG4363	8332	7239	17817	12336	12609	9500	16754	19830
CG43658	443	492	941	787	565	435	1228	1546
CG43673	2838	1857	6658	3597	10315	2348	27	56
CG43736	476	535	1101	556	731	553	1396	1526
CG43759	32	12	66	32	26	24	84	139
CG4377	12192	11123	25798	20146	20374	14641	30534	34845
CG43773	196	162	303	79	110	87	195	156
CG43774	5593	6975	6998	3604	8774	5573	5475	4930
CG43783	524	459	904	580	795	685	1012	1109
CG43797	26	31	9	17	7	7	15	27
CG4393	224	218	630	414	185	197	654	880
CG44005	0	0	0	0	1	1	4	64
CG44006	58	47	36	27	18	18	28	35
CG44008	15273	17256	22422	16059	12558	12919	13257	11024
CG44013	1407	608	2002	2569	2249	1188	5767	5127
CG44085	307	514	939	719	666	642	1037	1367
CG44098	272	276	251	80	324	139	25	131
CG44251	2668	2923	6735	4984	4720	3642	4683	4932
CG4476	0	0	3	0	6	4	13	85
CG45060	456	422	973	814	818	743	1109	1126
CG4562	23422	41595	26294	27198	32983	30034	21800	15244
CG4563	973	1313	1601	911	1629	1264	587	279
CG4607	4347	3426	3642	2001	7149	4117	2127	2352
CG4612	334	362	550	427	417	362	700	906
CG4615	300	532	400	294	721	732	258	245
CG4630	336	446	347	233	431	414	158	196
CG46302	28	66	9	1	19	28	9	6
CG46339	1625	1243	9109	7219	4433	4562	20837	22467
CG4670	2575	3212	5477	4254	3748	3219	5248	6242
CG4734	5219	5155	7332	7260	6029	4310	10200	13854
CG4751	202	169	442	208	280	246	461	523
CG4757	1	2	5	5	497	93	3	3
CG4797	118	134	157	108	91	96	82	85
CG4822	73	55	43	53	297	218	63	63
CG4830	2819	8471	5531	4180	9777	9349	543	610
CG4835	218	199	684	748	317	443	633	490
CG4880	173	117	105	95	76	69	107	154
CG4928	7503	7315	8080	8402	11548	14808	6367	7736
CG4991	844	883	227	198	605	430	176	255
CG5004	1300	1406	3154	2106	2764	2222	3808	4425
CG5056	556	555	602	514	654	574	442	500
CG5071	4	2	9	3	4	3	31	30
CG5107	41352	88548	67378	42962	66522	60212	26707	38521
CG5114	567	574	609	469	781	566	417	465
CG5126	402	537	534	677	1057	941	477	632
CG5150	13965	15839	10294	9992	4267	4594	7400	6078
CG5157	324	299	331	514	374	387	829	724
CG5177	738	1042	730	851	1128	739	631	747
CG5196	630	577	1142	1229	1047	749	1443	1418
CG5246	4039	13805	6216	4164	3927	4611	741	673
CG5254	1052	1038	1604	1081	614	527	833	1323
CG5270	621	504	935	556	733	540	1181	1221
CG5346	3293	3246	2909	2725	2954	2487	2507	2758
CG5355	3708	3976	6278	5350	5278	5288	6883	7531
CG5361	218	337	129	120	146	392	460	600
CG5404	242	239	259	140	226	213	111	195
CG5455	1890	2725	2562	1870	2990	2487	1105	1191
CG5521	476	556	1130	698	950	702	1340	1336
CG5541	2811	3012	4689	4223	5627	4665	5053	5804
CG5568	0	0	0	0	0	0	3	35
CG5645	386	390	433	285	399	329	312	305
CG5646	386	321	396	320	128	164	201	220
CG5704	672	1197	770	670	493	628	774	798
CG5707	1345	1177	1420	1344	662	723	1332	1422
CG5767	16362	17292	19894	21881	26944	17155	15020	16680
CG5787	604	586	1002	683	788	678	1062	1288
CG5791	1	0	0	2	29	20	1	3
CG5793	313	313	649	410	460	440	671	806
CG5800	537	369	335	273	326	234	308	415
CG5804	13718	18776	20738	16325	28048	25643	12544	11857
CG5835	1602	1842	1875	1484	2224	1904	1490	1232
CG5853	1399	1958	2059	1751	1792	1469	1358	1400
CG5883	59	74	97	121	60	74	309	338
CG5888	0	6	5	9	18	96	5	11
CG5892	2	2	0	2	72	30	1	0
CG5910	1642	1776	3198	3697	3680	3064	3531	2734
CG5916	279	239	338	318	913	724	341	388
CG5945	48	79	405	151	174	69	5	50
CG5958	7057	9877	10483	10601	12538	11318	6658	5917
CG5961	390	385	171	106	230	218	170	242
CG5966	1592	1844	1663	1462	1883	1665	1045	992
CG5999	6539	3318	2376	1436	6128	8890	1080	1015
CG6012	77	125	429	293	252	243	197	305
CG6024	1	6	10	7	8	25	34	34
CG6048	3310	3976	3466	3456	4235	3975	2512	1737
CG6067	5017	2825	3011	2431	2231	2420	2295	1510
CG6073	435	427	473	358	536	481	271	278
CG6084	3423	4227	7447	5229	7700	7699	6132	8165
CG6145	998	1357	1016	603	1618	1169	888	1044
CG6271	3	0	4	14	4	4	112	113
CG6277	2464	4888	17106	15007	5263	5269	43627	40887
CG6283	4949	8876	5665	5239	6572	5644	21926	22977
CG6295	57452	80546	47806	40464	80049	73325	26710	21255
CG6296	5124	5945	1970	1805	966	1698	693	740
CG6300	18	40	91	175	63	291	99	137
CG6310	51	142	63	78	76	78	34	26
CG6330	130	49	281	182	880	505	108	196
CG6357	1924	1733	4614	3965	5246	4701	3266	3608
CG6398	44	23	111	48	88	66	74	243
CG6403	811	712	878	712	1206	875	458	557
CG6462	195	353	132	136	153	126	66	60
CG6550	342	351	337	236	324	252	239	288
CG6592	30	119	37	9	37	22	20	8
CG6659	3430	6418	3274	3255	4209	3598	1719	1772
CG6733	392	823	941	2021	826	3336	2025	2796
CG6734	483	504	536	403	435	352	761	772
CG6738	11	13	40	44	23	75	51	63
CG6767	1206	1285	893	919	1284	1185	1040	1423
CG6769	766	641	668	537	973	639	439	564
CG6830	5743	7057	15454	6639	10016	9912	14608	16612
CG6834	1352	1542	3151	1674	3827	4293	1628	1785
CG6839	4043	2982	10755	6184	14216	9189	2321	1649
CG6891	2855	2503	4471	4870	5196	5233	5198	5793
CG6908	476	690	838	547	237	323	1153	1335
CG6927	3	0	0	0	0	9	9	105
CG6933	624	437	95	209	53	86	209	183
CG6950	1414	1978	1594	1658	1852	2638	1275	1680
CG6967	789	462	403	1105	592	391	3302	2990
CG7029	1137	1634	3172	2058	2015	1695	3769	4172
CG7054	1850	2050	1841	1607	534	799	2145	2425
CG7120	101	84	60	61	43	32	203	291
CG7142	310	392	764	555	553	511	1248	1509
CG7149	639	689	804	648	2380	2061	832	649
CG7191	254	246	291	168	509	369	114	133
CG7231	5059	9086	4702	4878	6088	6376	5311	4267
CG7248	14	8	23	30	0	7	133	79
CG7252	39	39	69	57	233	397	96	95
CG7255	1824	2299	4288	3034	4419	3705	3554	3371
CG7272	1188	1288	1563	1848	4952	5054	1264	1403
CG7290	78	38	4	10	29	26	6	18
CG7358	364	380	698	503	556	386	724	794
CG7384	6	4	10	14	11	16	22	94
CG7408	728	882	548	438	548	749	775	789
CG7458	689	742	779	622	627	577	368	396
CG7466	122	120	309	126	177	105	275	354
CG7497	266	287	533	645	684	512	1088	951
CG7518	399	435	933	588	674	458	1086	1510
CG7542	26725	46496	37919	24473	56333	53935	16634	18311
CG7565	1066	983	1516	1314	1547	1418	2033	2313
CG7567	296	250	812	590	287	92	106	204
CG7589	727	514	1580	767	1703	830	354	575
CG7630	4394	5954	6101	5292	7090	6855	4143	4205
CG7631	1390	1803	1089	1145	3409	3005	2245	1316
CG7634	19	13	114	62	39	82	85	119
CG7714	0	0	2	3	73	10	5	1
CG7720	4001	3907	8555	9172	8157	10626	5753	2941
CG7724	20	34	26	20	225	82	27	63
CG7766	1086	1091	2356	1396	1831	1368	1928	2667
CG7806	2461	2849	5433	3471	6074	5337	4911	4821
CG7884	4	3	51	32	5	6	76	87
CG7888	599	439	767	294	398	233	225	755
CG7912	1710	1507	1487	1403	4749	4184	644	948
CG7916	10118	18459	23906	18581	28646	29599	44211	40161
CG7920	6075	8014	8077	8441	10814	9148	4753	6087
CG7953	15767	18504	25141	19957	23916	22033	36243	42846
CG7997	95	89	328	142	676	223	104	222
CG8008	511	406	670	278	356	229	182	497
CG8012	620	653	732	685	903	798	504	612
CG8031	1472	1333	2187	1915	1744	1478	2937	3222
CG8093	1810	2505	4741	3115	1701	1303	16374	16220
CG8128	2426	2978	3766	3421	5014	4417	2070	2245
CG8129	285	601	442	316	465	469	174	156
CG8176	873	847	1321	937	1232	1119	1688	1809
CG8184	912	880	3637	1322	1628	1140	4478	5009
CG8191	142	177	179	128	199	176	101	105
CG8206	1410	1519	1452	1343	1950	1837	1103	1408
CG8229	292	267	164	183	254	420	269	318
CG8299	3604	7151	4397	2902	4096	2780	2528	1783
CG8301	2	4	4	7	4	1	9	80
CG8306	542	638	1082	724	2311	1721	789	1081
CG8353	1265	827	1462	2386	1129	1022	5159	3965
CG8358	77	115	279	158	143	85	32	28
CG8360	505	492	527	527	684	669	379	506
CG8399	731	729	2042	1226	2048	1234	1428	1763
CG8468	1881	2131	2059	1992	2477	2457	1299	1257
CG8478	66	46	50	66	21	15	86	114
CG8481	303	247	326	256	736	608	303	338
CG8498	582	722	627	541	632	723	531	568
CG8539	369	501	49	32	56	35	84	86
CG8549	809	721	721	573	836	789	651	718
CG8560	21438	28709	23571	19786	33960	28540	18855	21347
CG8620	456	214	116	319	191	507	141	206
CG8628	5452	7649	15218	17545	19782	19961	8871	9954
CG8661	12496	19285	14797	13879	21804	19391	12679	11806
CG8675	283	317	286	231	362	265	203	273
CG8677	517	436	1171	582	713	581	1156	1271
CG8679	51	64	141	103	105	96	170	215
CG8726	669	766	1254	929	1005	1006	1327	1572
CG8773	34400	41018	24206	26364	55933	49199	21090	16809
CG8785	8573	8975	6813	9562	8764	7229	6390	4438
CG8834	38173	55237	26555	31287	36925	43690	22252	20481
CG8858	761	829	1378	917	1133	985	1701	1807
CG8950	443	293	389	482	518	394	1045	1035
CG8952	14681	17048	16046	13938	16293	15028	13946	11951
CG8974	1922	2231	2296	1894	2604	2463	1850	2074
CG8993	1039	1144	1167	1096	1368	1323	927	1075
CG8997	27864	39033	48743	36559	52228	54581	84870	82960
CG9004	319	298	302	251	357	241	220	280
CG9034	667	848	825	798	937	1030	506	541
CG9065	221	221	243	242	349	272	146	159
CG9119	902	1204	1136	1276	2022	2523	1836	3474
CG9171	629	891	1532	1240	1565	1784	1423	1701
CG9186	928	929	1503	1174	1976	1680	1772	1916
CG9192	2	0	9	1	48	17	2	6
CG9194	34	37	140	101	92	49	45	60
CG9246	624	570	512	379	552	368	436	548
CG9259	460	1318	975	1886	485	2776	2179	4852
CG9270	68	178	112	241	201	776	359	723
CG9281	2533	3363	4642	4187	5406	3937	5256	7020
CG9331	7022	7852	14699	12829	20183	18056	14742	18288
CG9360	51	80	250	148	330	179	377	583
CG9394	4166	4845	5124	3880	6951	5214	3674	4011
CG9396	893	1301	2541	2060	2390	2445	1729	1848
CG9399	1264	1182	1475	1517	1758	1578	961	1109
CG9411	12	18	123	56	536	117	3	73
CG9413	971	995	2921	1956	1147	1771	1928	2087
CG9416	532	497	622	397	559	475	366	280
CG9425	661	693	1627	851	1036	786	1878	2143
CG9449	147	124	96	94	81	155	49	60
CG9467	519	547	1042	760	865	630	984	1169
CG9485	294	272	655	525	735	785	1120	1182
CG9555	2363	3523	2564	2258	3674	3249	1548	1275
CG9572	14	12	54	15	223	79	12	27
CG9664	343	545	805	510	1342	897	595	755
CG9669	178	223	205	203	201	168	143	148
CG9674	5370	5904	12240	6481	6507	5667	10096	11805
CG9682	11379	19458	6800	6828	9076	9999	6743	7510
CG9747	26	28	188	77	449	120	11	71
CG9752	22	18	35	57	19	23	76	116
CG9812	22	15	104	51	163	93	17	34
CG9813	407	401	567	431	98	83	356	358
CG9825	2978	8433	581	679	2263	3393	1413	899
CG9826	546	514	1055	1051	115	163	501	361
CG9864	6044	6085	3110	3949	3162	2636	1874	1802
CG9896	7101	12558	11139	9638	14704	13758	6859	6630
CG9932	297	435	1304	667	727	620	1068	1952
CG9988	162	114	318	240	729	292	37	26
CHKov1	811	834	1359	1268	348	441	1652	1619
CHKov2	190	228	449	357	233	403	523	648
CHORD	385	332	474	533	483	455	216	301
CNMa	22	16	4	6	1	2	7	2
CNT2	5308	2437	3239	3036	1887	1463	1447	919
COX5B	5997	8265	8197	8453	8072	7901	5730	6383
COX7C	2934	4080	3527	3477	4322	4621	2988	2620
COX8	3449	4732	4319	3821	5016	4980	3028	2949
CR14033	342	526	386	298	638	751	286	303
CR17024	91	70	61	69	553	344	25	26
CR18228	1004	988	929	817	146	277	1084	1075
CR32636	100	68	63	43	34	35	44	34
CR33013	9	6	94	65	167	237	6	12
CR42491	292	374	454	290	401	278	245	217
CR42532	449	437	492	652	965	840	540	607
CR42861	84	79	20	6	7	15	5	11
CR42862	17293	17490	35009	16661	22621	20871	32535	41208
CR43151	4	2	18	10	5	3	60	76
CR43605	0	0	18	11	2	8	2	3
CR43929	67	52	50	44	28	18	41	46
CR43952	65	84	49	58	62	66	33	23
CR44138	890	1155	3629	1712	83	197	1622	1953
CR44145	164	144	274	325	328	873	213	191
CR44310	252	310	345	251	588	572	216	231
CR44370	0	0	7	2	0	0	7	68
CR44423	52	54	140	122	110	72	193	200
CR44628	0	0	66	41	1	0	0	0
CR44662	41	56	62	43	30	30	14	5
CR44809	82	61	67	33	70	92	23	33
CR45140	84	55	27	17	78	83	40	26
CR45215	203	168	152	138	226	253	130	137
CR45566	1	0	43	42	1	0	0	0
CR46002	1	2	6	0	148	244	4	2
CREG	2565	2595	4474	4891	5765	6178	4083	4176
CRMP	145	163	329	177	507	297	306	320
Ca-alpha1T	56	79	234	109	215	99	152	223
CaBP1	2279	1725	6260	9551	3166	2157	4706	6012
CadN	2	3	19	12	26	9	10	100
Caf1-180	129	119	203	148	133	97	260	414
CalpB	366	350	787	592	599	449	762	898
Calx	2445	3219	4620	3166	5530	3890	5360	6346
Camta	393	416	805	662	704	1185	850	1011
CanA-14F	178	220	491	374	379	306	467	634
Capr	1642	1897	3301	2685	2479	2094	3355	4404
Cbs	568	500	1125	615	1306	790	920	1514
Ccm3	2219	2251	4995	4377	3415	3775	6692	6658
Ccs	399	316	444	423	479	424	258	320
CdGAPr	202	256	406	310	347	259	544	604
Cda5	34	33	85	73	32	41	171	169
Cda9	124	133	284	126	1935	392	73	91
Cdep	2517	3129	6549	4369	4214	3650	6401	7828
Cdk1	36	17	38	53	38	27	84	131
Cdk4	127	78	153	164	363	266	128	210
CenB1A	568	606	1506	993	1286	841	1312	1791
CenG1A	959	1120	2081	1552	1516	1635	2128	2545
Cf2	648	612	1155	785	957	855	1207	1354
Chc	8708	10496	17044	12244	15128	13604	17867	20154
Chchd2	1304	1642	1894	2404	2561	2012	979	1075
Chd1	994	1173	2134	1221	1576	1347	2098	2282
Chd3	15	16	23	42	23	16	51	85
Chd64	9792	13063	22528	19293	18628	18395	24637	27464
Cht4	2860	1305	1409	1251	2648	1188	6480	5785
Cht5	22	11	104	72	11	22	8	35
Cht8	1088	812	3870	1731	8310	1980	287	738
Cip4	1499	1429	2515	1894	2649	2056	3166	3363
Cirl	763	912	1609	1128	1622	1059	2272	2929
CkIIalpha-i3	268	262	452	284	753	625	348	351
Cka	1105	1276	2098	1427	1572	1226	2309	2399
Cks30A	10	5	12	21	7	11	51	64
ClC-a	1042	1377	2596	1368	2437	2348	1934	2219
Claspin	68	40	135	140	95	70	200	274
Cln7	1790	1625	1581	1252	1590	1293	1630	1562
Cnx99A	4637	6249	7737	8379	4852	3950	6061	6752
Col4a1	98	82	170	207	345	259	232	1842
Cpr62Ba	133	105	25	9	18	13	3	21
Crag	1776	1780	3364	2408	3046	2161	4056	5208
Crtc	473	506	908	557	622	629	986	1117
Crys	1672	2049	1522	1489	1791	623	3350	4212
Csk	737	904	1462	968	1059	914	1512	1747
Ctl2	3191	3071	6178	4366	6275	4891	6573	7297
Ctr1B	1165	1046	894	1045	3252	2487	776	957
Ctr9	1044	937	1641	1223	2435	2109	1457	1808
Culd	471	383	48	31	32	34	24	26
CycA	106	79	109	171	124	123	375	1239
CycB	98	54	94	104	91	114	415	2237
CycE	37	38	81	75	33	49	141	201
CycJ	4	1	1	0	4	0	5	98
CycY	546	613	969	812	882	740	1123	1306
Cyp12a5	1510	1727	3215	1583	1609	1750	3281	4304
Cyp12b2	390	463	499	470	178	212	619	671
Cyp12c1	2181	2273	1976	1853	2458	2338	1521	1309
Cyp12d1-p	278	268	152	95	183	217	125	232
Cyp12e1	231	230	261	299	68	69	325	344
Cyp28a5	1112	1560	1604	1097	1520	1513	1014	973
Cyp28d1	1525	3735	5599	2612	10362	9449	2152	3525
Cyp304a1	28	52	35	14	60	43	12	13
Cyp305a1	112	112	128	162	135	90	321	331
Cyp309a1	1421	1043	1306	416	3786	2971	1443	1942
Cyp317a1	263	335	665	579	280	328	746	663
Cyp49a1	433	282	462	174	527	246	98	292
Cyp4ac3	493	408	409	440	127	164	555	523
Cyp4d1	754	1178	4781	4404	5454	4474	1238	1221
Cyp4e3	157	489	187	329	51	260	108	141
Cyp4p1	581	614	913	663	2428	2788	658	690
Cyp4p2	1320	1447	1240	923	655	584	334	365
Cyp6a13	940	1180	1978	1728	956	1060	2309	2415
Cyp6a14	1684	1970	6488	5200	767	833	3486	4182
Cyp6a2	628	571	836	446	51	51	103	169
Cyp6a20	1247	1616	3827	2393	3761	4281	1392	1744
Cyp6a21	789	790	775	561	520	443	812	490
Cyp6d2	644	582	240	172	211	237	131	124
Cyp6d4	2032	3295	4227	3354	6168	5762	4483	4351
Cyp6d5	7512	10786	17259	11913	32783	26562	17655	18504
Cyp6g1	2376	2649	6748	4134	3826	3579	5135	7638
Cyp9b1	723	729	907	549	1120	921	609	615
Cyp9f2	11307	12722	21888	13525	7267	7133	19773	21721
Cyt-b5-r	215	171	479	269	820	601	288	583
Cyt-c-p	9290	13470	10219	12759	11956	12402	7461	7001
D2hgdh	2558	3054	6152	5044	5605	5847	3750	4837
DAAM	55	246	329	495	184	671	432	925
DCTN1-p150	1375	1579	2645	1884	2033	1750	2971	2946
DNApol-alpha180	82	54	163	164	122	71	208	334
DNApol-epsilon255	53	28	112	101	38	39	188	245
Dab	95	158	300	212	255	382	263	570
Dap160	919	989	1890	1300	1760	1476	1954	1921
Dbi	5912	7607	8956	7914	12709	8761	5252	5608
Dcr-2	2060	1583	2936	2359	2377	1760	4477	4578
Debcl	122	153	206	268	349	549	369	471
Der-1	399	332	814	813	676	521	553	615
Df31	1453	1243	1723	2167	1487	1201	2750	4123
Dg	1047	1138	1793	1562	1825	1519	2376	3151
Dgk	49	110	173	145	122	176	184	363
Dgp-1	864	743	697	689	719	583	640	755
Dh31	327	324	345	237	526	489	190	158
Dhap-at	421	748	1677	1171	993	779	1487	1635
Dhc64C	2234	2275	8159	3343	3824	3181	10482	10335
Dhit	147	114	200	158	242	155	297	348
Dhpr	407	424	452	451	562	466	336	360
Diap1	4310	4625	7538	6145	4513	3934	9162	8910
Dic61B	14	7	81	39	10	16	208	268
Diedel3	11609	26094	14476	10147	11985	12260	4294	4562
Dl	162	124	251	270	159	119	490	584
Dlg5	712	856	1740	931	1049	912	1691	1955
Dmtn	841	1020	1970	1228	1410	1219	1786	2001
Doa	1275	1341	2538	1638	2267	1912	2608	2987
Dot	369	450	891	790	761	689	672	703
DppIII	2403	2786	4471	4209	4025	3860	4704	5279
DptA	2	1	38	9	99	102	17	7
DptB	7	1	10	5	129	83	4	5
Drep1	111	67	110	140	44	33	131	249
Drip	1833	2019	2778	1771	1942	1780	1229	1241
Dronc	409	443	424	300	1215	885	742	886
Drs	16	13	4	4	654	74	23	655
Drsl2	221	72	49	80	43	34	239	128
Drsl3	188	56	40	38	116	64	91	56
Dscam1	208	261	588	463	222	230	753	901
Dtg	349	354	542	615	208	290	1127	1238
Duox	2	5	10	0	20	5	17	212
Dyrk2	440	545	914	597	813	584	1020	1163
Dys	1688	2135	5307	2751	2873	2678	4517	5618
E(Pc)	579	602	1523	707	903	728	1244	1687
E(bx)	1507	1677	2776	1738	2091	1910	2796	3226
E(spl)m3-HLH	207	196	312	410	111	161	563	662
E(spl)m6-BFM	116	9	1	2	16	16	1	4
E(spl)mbeta-HLH	185	169	151	162	75	112	177	274
E2f1	1316	1549	2218	1718	2012	1886	2599	3056
ERp60	7982	8660	16808	23212	14115	11254	15917	19228
Eaat1	2703	2622	4389	2959	2879	2289	1418	1200
EbpIII	3006	2398	5207	2162	11019	3125	464	1724
Ect3	149	153	960	747	309	188	255	280
Ect4	4558	5035	10444	7646	5528	7138	11773	13467
Efa6	391	368	863	551	761	605	821	1034
Egfr	285	365	572	418	493	362	646	908
Eglp2	1168	2842	1649	1876	3139	2941	888	1209
Eglp4	1017	1522	1692	1423	2003	1946	689	894
Eip71CD	2798	5204	2689	2985	3447	2749	2999	2634
Eip74EF	315	247	482	323	360	315	595	729
Eip78C	64	69	292	147	44	72	289	277
Eip93F	1108	1227	2752	1610	1719	1804	4203	4426
Eo	80	115	44	31	37	51	56	89
Epac	629	727	1102	861	983	660	1459	1481
Esp	19	12	34	5	35	12	57	370
Ets21C	367	206	274	271	142	116	218	326
Evi5	448	485	913	522	1120	876	654	787
Exn	827	1204	2314	1383	2259	1857	3801	4428
FASN1	3240	3046	3685	2580	5283	3457	5213	8894
FBXO11	555	622	928	744	851	715	1224	1488
Faa	23	31	25	25	250	245	25	52
Fas2	1042	1575	1816	2018	2318	3362	2767	3803
Fer3	4	8	18	16	12	20	30	50
Fhos	1414	1580	3114	2193	1674	1260	3363	3458
Fie	68	63	32	34	41	42	13	38
Fim	11675	14035	23626	19804	25076	26827	24816	25241
Fit1	2253	2513	4750	3603	3047	2752	6030	6649
Flo2	343	294	685	545	425	555	792	1012
Fmo-2	2540	2689	3342	2553	2656	3327	1865	2314
Fmr1	956	999	1562	1184	1341	1178	1884	2122
Fnta	735	764	1509	1160	1812	1378	901	939
Fpps	1275	1278	2104	1972	2035	1779	2463	2767
Frl	228	216	435	372	407	304	858	1116
Fs	10	6	22	12	9	4	17	224
Fst	6967	6145	16043	8329	17959	16302	13989	15920
FucTA	32	24	37	90	69	65	119	155
FucTC	333	398	696	391	1249	1079	368	420
Fur2	142	129	299	172	322	154	432	843
GATAe	2287	2530	2170	1591	3074	2473	2205	2593
GC1	1154	1426	2051	1571	1781	1443	917	1031
GEFmeso	1905	2731	5054	3158	3375	2717	5669	6189
GILT1	196	171	251	155	741	369	163	384
GILT2	17	23	38	47	193	263	22	40
GLaz	314	333	489	312	238	177	301	446
GNBP-like3	29	19	12	9	271	103	13	31
Gadd45	710	522	374	309	539	460	336	396
Gagr	247	262	388	186	673	448	258	328
Gal	211	356	358	271	676	689	186	162
Gale	3341	2834	4892	4948	7041	5272	3779	4136
Galt	980	1291	1475	1577	2489	2250	1294	1758
Gba1a	1895	2051	1791	2072	2151	2364	7226	9500
Gbeta13F	3166	3176	5260	4825	4804	4615	6115	6795
Gclm	4497	4179	5581	3812	4131	3842	2471	2460
Gcn2	374	356	631	424	511	573	671	862
Gcn5	728	669	528	419	783	725	580	654
Gdh	5083	5866	7228	6361	6974	6379	4063	6032
Ggt-1	1235	983	913	933	1211	1338	776	1064
Gip	811	1166	1673	1529	1832	1853	2511	3342
Gk1	1884	2549	3257	2859	2788	2669	1690	1785
Gld	16	21	72	17	1	2	5	36
Gli	2290	3367	6664	4836	4877	4143	7990	8358
Glut1	194	239	289	210	618	608	173	284
GlyP	1921	2495	4121	3356	4879	3865	4089	5530
GlyS	992	908	2038	1439	2081	1611	1899	2198
Glycogenin	137	201	415	380	293	379	482	732
Golgin245	1645	1644	3224	2074	2348	2028	2983	3282
Gp210	804	784	1264	1045	856	790	1470	1924
Gp93	7118	6232	18954	26238	9983	6016	9111	11425
Gpo-1	1791	2313	2348	3002	5286	4762	2982	3708
Gprk2	458	451	897	614	566	503	1039	1123
Gr94a	101	50	21	19	32	31	15	10
Grip91	174	127	96	82	82	68	90	159
Grx1	2402	2881	2645	2102	3058	3235	2092	2009
Gs2	12649	11847	11532	8824	16470	12284	9874	9482
GstD1	6558	8028	12296	11460	12742	10580	13704	18910
GstD10	202	235	136	229	89	131	852	973
GstD5	411	636	398	275	255	154	156	201
GstD7	65	72	178	120	93	84	189	210
GstD8	123	53	385	272	94	59	382	446
GstD9	773	717	1031	1080	600	976	2286	2803
GstE1	450	440	820	535	102	174	266	447
GstE11	281	348	392	319	151	159	391	444
GstE6	1604	1475	3306	2142	2403	2096	2811	3461
GstE7	1332	1842	5001	2590	2421	2216	2047	2392
GstE8	412	473	1272	548	1633	1388	592	726
GstE9	879	1111	2520	1608	5259	4826	1154	1507
GstO3	4265	4435	6672	5200	3282	3005	4373	4596
GstS1	1331	1160	1432	1189	2404	1581	756	930
GstT3	1103	1029	916	963	527	692	1011	1109
Gug	707	1014	1919	1114	1515	1050	2316	2558
H	255	241	387	270	280	287	519	581
HERC2	204	145	623	295	253	176	856	1285
Hand	177	218	169	201	238	212	135	151
Hel89B	602	773	1240	835	968	839	1356	1516
Herp	2066	1903	4159	3624	3639	3367	2247	2685
Hers	828	793	1845	1262	1022	960	2062	2297
Hex-A	1648	2876	5790	4334	3635	3405	4500	5713
Hexo1	2253	2923	5328	3974	6864	4563	2642	3077
Hipk	1326	1627	2686	1549	1941	1695	3515	3781
His2Av	987	950	1187	1288	883	725	1053	1604
HmgD	684	686	672	835	621	509	1227	1780
Hmt4-20	537	695	1262	660	829	649	1339	1683
Hmu	2053	2221	3512	3415	3164	2608	3690	4658
Hph	2467	3927	6760	4461	5947	5136	7948	9124
Hr4	14	11	31	12	274	180	29	10
Hrb87F	1590	1737	2947	2247	2001	1844	3534	3926
Hrs	963	1051	2051	1471	1738	1375	1703	2131
Hsc70-3	16668	12161	37072	39722	17319	12527	17127	18464
Hsp23	1719	1014	1852	1063	769	464	353	923
Hsp67Bc	30	24	34	44	3	5	12	27
Hsp70Aa	762	284	2458	725	255	174	346	1290
Hsp70Ab	860	292	1930	639	168	138	286	987
Hsp70Bb	269	92	1206	634	674	1105	510	563
Hydr1	1846	3732	2698	2505	3231	3189	1818	2056
IM1	16	1	1	1	123	79	1	1
IM2	49	7	7	3	241	174	17	14
IM3	10	6	2	5	142	108	5	4
IM33	2978	1601	2005	593	2580	1339	373	948
ITP	285	232	549	664	321	389	1255	1214
Idgf1	285	146	140	182	287	1459	39	109
Idgf2	267	153	212	85	118	91	128	318
Idh	11287	12612	21555	18358	18853	15729	9325	13126
Ilp3	217	171	44	103	262	244	161	128
Ilp8	2	1	0	0	0	4	17	106
Iml1	639	701	1411	801	951	853	1392	1658
Imp	1157	1351	2018	1366	1824	1711	2415	2956
ImpL2	1020	800	1000	754	2040	1199	4510	5212
ImpL3	1304	1127	2500	1995	1761	1199	3228	3708
InR	690	605	1684	1122	954	1015	3706	3581
Inos	671	750	1392	1486	1325	624	1276	2339
IntS12	234	236	69	64	70	72	59	79
IntS6	337	356	535	455	498	410	748	827
Ir62a	28	36	138	68	81	74	151	171
Ir68a	2	3	49	40	57	32	4	16
Itgbn	2059	2785	5237	3373	3915	3569	6354	6922
Itp-r83A	671	743	1584	827	1065	829	1770	2201
Jarid2	444	591	1204	595	708	550	1268	1523
Jheh1	2844	5013	4288	4118	5632	5104	2447	2011
Jheh3	9945	16671	12263	14611	13770	13308	9673	9687
Jon25Bi	44885	85555	24544	28122	15154	12772	27311	27183
Jon25Bii	41910	74854	16063	22956	22128	24608	17462	12645
Jon25Biii	49096	75889	120492	124447	190156	129470	144319	157915
Jon44E	2596	2843	5953	5616	2204	1897	7264	6809
Jon65Aii	5931	14879	33174	25867	42918	40893	18155	11259
Jon65Aiii	293810	387183	188163	201715	274661	213890	111982	102473
Jon65Aiv	347535	511134	263129	279925	408574	313027	127869	127827
Jon66Ci	791	1700	4553	6890	22890	14197	6119	4499
Jon66Cii	55	193	545	648	4105	2153	468	213
Jon74E	22897	42362	23765	14783	38917	31572	12023	11896
Jon99Cii	140630	254081	136353	133429	175524	120846	108581	139645
Jon99Ciii	86113	161900	87758	89030	110408	80761	71582	101014
Jon99Fi	75366	131593	79302	97787	128308	98944	54453	47290
Jon99Fii	48754	86142	59522	72558	93208	69477	34783	33356
Jupiter	779	602	821	861	1251	1016	1451	1773
Kat60	621	553	936	766	965	779	1228	1556
Kaz-m1	5191	6703	5927	5059	10535	9375	3111	2971
Kaz1-ORFB	50	37	108	72	43	29	152	165
Keap1	443	701	499	432	480	352	419	369
Khc	3454	3519	6699	5122	5588	4914	7265	8278
Khc-73	2072	2421	4798	2653	3375	2713	4930	5271
Klc	1905	1848	3175	2639	3780	3524	2739	3069
Klp10A	915	907	1718	1287	1254	1010	1896	2194
Klp54D	172	168	0	1	1	0	97	98
Klp61F	59	35	48	62	48	38	134	169
Klp68D	245	227	526	377	369	264	570	705
KrT95D	218	228	454	336	393	409	851	922
LBR	93	75	164	158	99	79	223	244
LIMK1	323	416	938	586	498	422	956	1256
LManI	5653	8272	5170	4865	7077	6462	7019	4642
LManIII	2998	4046	4852	5441	3628	4410	45695	24117
LManIV	405	672	295	385	192	209	7163	3231
LManV	20407	33823	46736	39958	34863	41181	121961	79575
LManVI	44364	56876	98932	80570	79702	79643	185076	122716
LRP1	78	116	329	149	105	83	199	470
LRR	2505	4062	6476	3887	4709	4231	7256	8136
Lam	682	530	877	805	630	580	1142	1530
LamC	1245	1082	2928	2299	1956	1745	2226	3373
LanA	485	539	1759	1051	851	660	3509	4779
LanB1	543	553	908	671	1238	890	1498	2368
LanB2	337	319	718	526	945	504	950	1639
Lip3	1	8	12	0	4	0	35	70
Lip4	534	684	1763	1949	329	724	2138	2139
Liprin-alpha	798	891	1627	1161	1178	1038	2348	2465
LpR1	2354	4274	3923	3237	1695	1626	2153	2355
LpR2	1778	2064	3818	2150	2425	2385	3794	4460
Lrch	864	808	1271	1128	930	887	1793	1866
Lsd-1	1548	1645	2400	1976	1473	1806	961	1509
Lsd-2	9634	19193	16974	12923	12738	11938	7155	7459
Lsp1gamma	107	76	82	59	3549	10308	57	37
LysB	3643	2038	153	133	18	14	121	38
LysC	22	30	0	0	0	2	0	0
LysD	33179	35193	1055	1034	55	36	1655	1191
LysE	629	1223	374	373	1524	1090	311	93
LysP	86	12	7	2	65	38	47	304
LysX	2130	1904	207	1972	416	452	2270	1965
MED10	492	507	517	435	652	659	424	455
MED14	467	489	738	521	602	418	948	1045
MESK2	1802	2024	3022	2424	2417	2046	3170	4326
MESR3	1178	1552	3642	2928	2839	2784	3163	4263
MFS1	879	2709	485	352	1990	1943	29	13
MFS12	2322	3081	1307	1141	2387	3606	668	842
MFS18	328	340	479	461	853	571	350	361
MFS9	49	76	317	187	412	430	69	252
MRE23	69	76	184	151	128	152	233	239
MRP	7289	5735	16516	9413	15101	12437	13559	13637
Madm	354	417	706	558	596	440	785	952
Magi	81	73	184	150	116	103	203	267
Mal-A1	51557	56179	168992	113464	155086	96750	195075	257171
Mal-A2	7575	8655	17455	13509	16896	12687	25295	29003
Mal-A3	3907	5839	13767	9116	12154	9746	25450	24611
Mal-A4	2717	2700	10297	5735	7178	4920	16537	17824
Mal-A5	37	47	91	45	292	179	113	464
Mal-A6	22619	26784	61332	36373	49123	30900	80712	113390
Mal-A7	8639	12159	36050	20455	17486	7218	35731	47525
Mal-A8	9194	12572	28315	16837	20140	11442	32764	40189
Mal-B1	44	11	18	3	787	1371	130	401
Map205	1675	2036	3811	3178	2743	2479	5694	6174
Mcm10	34	18	39	71	20	12	95	147
Mcm5	54	46	100	124	46	42	155	280
Mctp	330	273	565	426	355	290	874	1074
Mdr50	5606	9504	9748	4448	8078	7829	5929	5013
Meltrin	748	797	1446	990	682	630	2132	2107
Men	2773	2599	4176	3241	6911	5349	4056	6742
Men-b	1908	2041	8272	3683	3113	1589	7054	9635
Mes2	131	128	166	162	180	159	255	352
Mhcl	452	499	1065	661	813	624	1170	1340
Mi-2	1493	1297	2511	1581	1686	1294	2873	3437
Mical	1105	1441	4275	1928	2589	1748	4222	4109
Mipp1	3523	6345	5493	4162	7730	7192	2218	2671
Mis12	107	74	28	25	30	29	78	63
Mkp3	320	348	807	716	541	385	1127	1413
Mlc1	2739	3429	3162	3163	4527	3239	2444	2879
Mlc2	4913	6096	5322	6350	9362	6141	4431	5709
Mlp60A	1661	1821	1621	1613	2071	1760	1072	1274
Mmp1	3028	3539	6492	5218	4681	3853	6717	7652
Mmp2	217	217	764	293	157	101	1426	1197
Mocs1	2195	1085	1199	700	1819	1938	673	681
Moe	14004	16290	28740	24199	26692	25477	32510	34263
Mp20	2977	3586	3101	4049	4473	3268	2663	2836
Mrp4	500	708	798	706	1493	1624	817	975
Mrtf	429	551	1361	767	865	590	1584	1822
Msp300	3397	3807	18574	8189	6493	6558	20655	21926
Mtap	1033	1517	1491	1460	1398	1488	811	1014
Mtl	266	288	335	368	314	281	619	641
MtnA	6397	21360	12402	8499	9799	19593	3951	5040
MtnE	561	1413	1069	498	725	711	651	326
Mtor	993	827	1953	1124	1171	1045	1860	2291
Muc14A	449	1091	496	147	3238	2588	212	156
Muc18B	51	45	22	41	549	760	71	73
Muc68D	24249	17117	74901	37561	103327	24361	3546	8384
Muc68E	2178	3125	10192	5499	6660	5940	7047	6613
Mur29B	7828	5637	14731	20872	14897	11410	19688	17323
Myo10A	23	15	87	43	49	16	112	195
N	89	76	220	138	121	74	574	825
NAAT1	3581	5427	3885	2745	5423	6077	3495	2532
NAT1	4452	4506	8600	5502	7204	5693	9850	12019
ND-13B	1249	1605	1308	1281	1569	1515	1115	1279
ND-AGGG	3238	4145	3492	2787	3949	4138	3052	2957
ND-B12	1794	2194	2031	2091	2965	2582	1505	1708
ND-B14.5B	2084	2718	2785	2649	3508	3364	1946	2133
ND-B15	1103	1601	1420	1479	1890	1821	1047	1085
ND-MLRQ	4266	5939	5876	4941	5703	6732	4019	3471
NFAT	392	399	654	503	533	681	686	952
NLaz	1963	2132	3669	1958	337	551	1776	2335
NPF	1099	1036	981	926	1583	1203	597	591
NT5E-2	341	485	758	860	1700	1594	660	935
NaCP60E	149	249	715	423	383	328	899	763
NaPi-III	102	114	128	176	163	118	191	791
Naa60	370	426	507	446	1123	861	593	588
Naam	224	201	141	181	36	50	160	187
Ncoa6	415	475	991	533	614	523	1021	1244
Nep2	89	143	145	197	130	229	302	594
Nf1	343	383	651	378	470	411	695	849
Nha1	4512	6027	5044	4104	7033	5046	2588	2870
Nhe2	674	529	1669	1088	793	671	1614	1805
Nhe3	1083	1380	2401	1520	3218	2549	1700	2339
NijC	74	47	148	60	291	65	12	27
Nipsnap	1239	1497	1833	1622	3524	3215	1792	2111
Nle	346	359	366	291	461	319	264	320
Nmd3	852	919	920	671	1197	808	700	854
Nmdmc	288	297	327	311	316	205	143	210
Non1	5328	6370	7220	4615	12067	9116	3972	6264
Nost	591	597	1562	1163	792	984	1752	2211
Not1	4278	5645	12067	6529	8673	7488	11584	12870
Npc1a	1364	1390	2141	1754	2897	2519	2209	2922
Npc2a	785	562	1608	1706	442	327	1825	2387
Npc2b	284	263	246	129	377	182	112	218
Npc2f	3934	6139	6921	4823	12055	10224	6250	5771
Nrg	627	476	962	810	751	569	1707	2210
Nrx-1	203	201	208	163	138	88	325	374
Nrx-IV	437	374	781	508	538	484	852	1028
Ns3	652	565	660	531	782	506	464	590
Nup153	877	876	2064	1165	1099	905	1999	2252
Nup205	302	267	469	351	281	199	621	974
Nup214	449	404	636	491	559	399	792	979
Nup358	1733	1281	2930	1647	1508	1436	3427	3891
Nup93-1	341	308	542	536	467	314	589	816
Oat	33	27	17	21	43	33	58	478
Oatp30B	350	351	835	717	690	726	1153	1398
Obp99c	79	43	58	106	242	197	94	250
Ocrl	638	689	1196	895	1009	783	1153	1411
Odj	506	550	637	548	1370	1065	565	576
Opa1	1651	1777	3061	2291	2911	2548	2929	3436
Orc2	26	25	84	71	40	40	85	122
Orcokinin	1144	1486	1457	1036	1455	1234	525	519
Oseg4	484	688	2627	1422	2140	1674	1825	2260
Osi24	12	12	81	28	130	41	6	19
P58IPK	2202	1772	4971	5934	3269	2572	2339	2542
PCB	2606	3010	4960	4418	3032	2125	5341	5703
PCNA	122	90	185	282	136	100	330	492
PDZ-GEF	191	266	473	318	313	254	534	788
PGRP-LB	1950	2252	2004	1490	1940	1183	3937	2459
PGRP-LE	1313	1169	1375	1019	1806	1610	1061	1030
PGRP-SC1a	194	196	354	351	923	834	482	148
PGRP-SC1b	1347	893	3122	2744	1231	616	2129	683
PH4alphaPV	469	654	454	365	311	393	180	234
PHGPx	3892	4682	3992	3526	3970	3631	3549	3832
PI4KIIIalpha	921	1046	2255	1633	1994	1406	2455	3104
PIG-L	899	922	1355	1231	1180	1014	1748	1850
PIG-Wb	3186	3392	10499	6655	8992	8405	9927	12170
PMCA	6687	8114	11920	14323	15372	32525	17788	21830
PRAS40	804	968	984	817	1243	1029	608	866
Pak	2421	2820	5285	4087	3656	3562	6126	7149
Pal2	190	266	267	161	409	206	123	151
Past1	3975	4498	8793	7323	7583	5677	8590	10004
Patronin	1010	1131	2445	1461	1433	1347	3762	4181
Pax	1590	1740	2919	2497	2952	2304	3045	3983
Pbgs	951	1196	1710	1362	2353	2071	1051	1029
Pde1c	332	306	473	289	334	224	689	904
Pdk	1714	2342	1522	871	2713	2649	1254	1418
Pdxk	4403	6187	5963	5681	12339	10659	4692	5132
Pebp1	48804	51574	42225	50501	42861	37234	28963	27035
Pect	1056	1247	2870	2271	1716	1259	1716	1995
Pen	98	85	94	219	76	61	307	702
Pex16	1488	1683	1813	1552	1259	1155	1554	1372
Pez	436	556	1023	768	726	548	1237	1374
Pfk	752	668	1543	871	1069	861	1832	2212
Pgi	2121	2267	4110	3099	3303	3143	4089	5786
Phae1	2515	2748	2442	2114	3331	2346	1825	2158
Pi3K21B	2693	1678	2979	2941	2453	2326	7179	8084
Picot	15951	21487	16147	12513	13663	11546	17401	14914
Piezo	85	68	188	123	182	111	162	268
Pino	4048	3816	2836	2883	4403	4254	2602	2571
Pka-R2	2320	2860	3891	3193	3853	3548	4792	5401
Pkc98E	504	569	956	701	853	871	1042	1281
Pkn	1715	2472	4667	2715	2813	2476	5054	5719
Plc21C	274	330	532	450	768	737	458	686
Pldn	192	158	160	115	181	177	113	114
Plp	344	277	637	404	527	368	780	828
Plzf	176	198	455	196	303	225	357	519
Pmm45A	979	924	1453	1355	1173	1047	1906	2153
Pmp70	10039	16010	11086	11852	29106	22079	6585	5843
Ppa	665	820	1428	1123	897	812	1666	1858
Ppn	473	529	1043	1155	1182	441	1356	1877
Prosap	564	554	1287	744	987	687	1705	1738
Prp18	223	234	199	178	259	209	117	162
Prp8	1633	1478	3087	1962	2198	1813	3108	3491
Psf3	345	474	553	474	1064	945	408	423
Psi	659	548	1059	744	726	697	1335	1475
Ptip	150	195	371	201	255	212	357	443
Ptp36E	88	106	158	171	381	238	148	150
Ptp4E	373	298	736	424	452	325	662	943
Pvf1	565	534	1824	1857	792	766	3865	4588
Pvr	1706	2157	3667	2567	2439	2501	3852	4226
Pxt	4	3	1	1	18	16	49	420
RIOK1	353	275	315	237	298	245	227	266
RIOK2	270	306	280	189	288	240	186	191
RNASEK	7157	8606	7457	7013	9314	10946	5621	5344
RNaseMRP:RNA	95	4	1	0	1	0	3	1
Rab3	94	100	89	62	139	122	58	60
Rab32	1593	2898	2275	1959	2970	3020	1621	1670
RabX1	463	407	764	713	804	507	1066	1099
Ranbp21	355	347	585	471	441	338	652	862
Ras85D	1509	1524	2394	1898	2281	1978	2977	3096
Rbcn-3A	1810	2185	6721	3426	3820	2937	9300	9753
Rbcn-3B	1441	1605	2930	2135	2206	1848	3753	3910
Rbfox1	89	83	138	82	157	118	181	281
Rcd2	1737	1797	3884	2113	1570	1590	4948	4780
RecQ4	34	15	56	72	54	29	92	196
Rel	3540	4344	4352	3552	2538	2018	5089	3617
Reps	413	416	712	553	578	517	853	1040
Rho1	9926	9645	17447	15261	12367	11365	21628	22221
RhoGAP15B	923	1236	2228	1498	1373	1131	2442	3080
RhoGAP19D	668	912	2003	891	1957	1247	2338	2674
RhoGAP71E	422	442	756	560	716	612	991	1207
RhoGAPp190	1070	1028	2264	1205	1933	1628	2770	2868
RhoGEF2	1476	1702	3159	1801	2366	1892	3892	4071
RhoGEF3	259	273	418	342	242	222	502	721
Rhp	719	633	1223	719	591	507	1279	1560
Rich	531	617	1094	803	812	682	1115	1280
Rif1	63	48	124	125	72	66	218	382
Rip11	2031	2707	5049	3394	3337	3018	5189	6329
RluA-1	725	1654	749	478	1788	1218	366	507
Rme-8	1754	2053	3761	2444	2738	2549	4201	4359
Roc2	126	131	80	60	80	77	136	142
Rok	1126	1084	2527	1810	1816	1322	3288	3885
RpII215	1500	1625	2415	1579	1901	1461	2657	3217
RpL10	25065	36336	38403	31189	43840	41571	24779	28223
RpL10Ab	25743	34740	36261	27879	45737	40022	22217	28747
RpL13A	11640	14753	17216	14811	24388	18176	9363	13699
RpL14	20084	25828	27998	20820	34491	28842	14883	20375
RpL18	7785	10878	13094	11054	16654	13881	6970	9366
RpL22	4553	5173	7501	7104	11377	8382	3930	6316
RpL23	15948	20006	22749	18739	32814	25113	13844	18153
RpL23A	14590	19512	29763	27480	44544	35281	17152	23562
RpL24	9227	12441	14516	13206	21144	15877	8092	11241
RpL24-like	1810	2127	2216	1651	2942	2281	1278	1956
RpL27	12525	17253	18793	14309	24135	18984	9446	12995
RpL28	12762	15372	17409	16260	24897	19068	9723	15139
RpL29	7265	9396	9335	6191	10157	10493	5205	5701
RpL30	10747	13220	15080	12530	19433	15972	7894	10963
RpL31	9920	14288	15759	13134	21095	18859	7638	10656
RpL32	13504	17711	22017	18812	27833	22814	9811	14929
RpL34b	6402	7757	9054	7301	11520	9324	5068	6502
RpL35	13293	17639	21174	16181	28737	22853	11741	16219
RpL35A	9861	12343	15653	12778	20617	15490	7060	9732
RpL36	18729	23833	26048	22070	38420	30330	15565	21614
RpL36A	14126	18046	19971	13667	24038	21209	10900	13006
RpL37A	3450	5068	5101	3989	6819	5880	2914	3538
RpL37a	17330	21731	24391	20760	34574	26965	12843	18750
RpL38	11057	14236	12867	9682	15230	17348	8178	8681
RpL39	3462	4681	4404	2592	4183	4966	1998	2040
RpL40	14971	20767	23923	19450	31408	26719	14013	17660
RpL41	7408	10671	11228	8774	11275	12517	5647	6899
RpL6	20863	27650	31534	25900	41677	32557	17578	24319
RpL9	16716	22358	24865	18911	32800	27579	14550	18692
RpLP2	16862	19933	24713	24904	43621	31319	19749	26484
RpS10b	10830	14540	16566	13437	21982	17550	8826	12445
RpS11	14167	18134	20280	18408	26407	22347	11974	17434
RpS12	13043	16972	19431	16302	27169	21170	10682	15977
RpS14a	4679	6054	7291	7223	12282	8855	4758	7058
RpS15	24132	31421	34091	28013	46394	37802	18488	25558
RpS15Ab	308	480	418	340	588	517	267	331
RpS16	9164	11654	14407	11666	19036	15301	7707	10957
RpS17	9367	12649	15909	12484	19481	15725	7576	10634
RpS21	5309	5981	7284	6211	10689	9242	4645	6116
RpS23	31821	39030	40756	31402	53007	44165	23987	32327
RpS25	17369	20754	23910	19118	31200	26664	15381	19367
RpS26	10898	13387	16355	16694	26268	20268	9496	13551
RpS27	12321	16384	17162	13578	22518	19601	8919	12130
RpS27A	12393	16500	17544	12879	20010	18408	11377	13437
RpS28b	13226	17879	19562	14479	20876	18727	10999	13354
RpS29	20361	27294	28928	23715	33418	28892	17086	20403
RpS30	16531	21298	24474	18611	30982	24655	13936	18215
RpS5a	19163	24399	29984	25731	41670	32290	17390	22902
RpS5b	7	4	4	5	20	9	35	1485
RpS9	1135	1718	1821	1228	1767	1874	620	779
Rpb10	258	266	248	170	220	261	90	118
Rpb12	323	322	302	199	278	235	160	164
Rrp1	113	85	184	186	198	140	344	486
Rrp47	253	272	262	254	281	256	174	229
RtGEF	603	737	1241	953	893	772	1413	1565
RyR	31	39	182	111	126	58	206	248
S	256	296	597	449	449	360	753	970
S1P	301	338	796	625	677	668	547	638
SH3PX1	2106	1972	3641	3209	3390	2656	3710	4113
SLC22A	436	793	268	345	187	121	513	516
SLC5A11	259	932	570	575	416	481	229	290
SLIRP2	121	142	98	86	75	67	73	73
SLO2	1	2	1	0	0	0	5	88
SPARC	222	225	221	288	531	435	243	392
SRm160	290	289	428	344	364	284	622	759
Saf-B	1055	1003	1808	1383	1395	1105	2052	2136
Sans	104	98	443	287	159	40	164	227
Sap47	1017	1136	2001	1551	1729	1558	2072	2274
Sclp	332	417	351	276	305	284	213	239
Sdic2	6	6	186	11	9	2	12	15
Sec16	1038	1222	3120	2115	1742	1325	3250	3622
Sec24CD	1652	1901	3861	3864	3041	2172	3015	3235
Sec31	1221	1361	2619	2424	1795	1359	2105	2591
Sec71	1426	1677	2879	2031	3326	2689	2780	2963
SelG	846	1038	943	558	870	721	592	599
Sema2a	426	305	664	765	579	385	1229	1507
2019-09-02	583	579	796	744	1058	840	1069	1315
2019-09-04	793	846	1687	1370	1799	1583	1987	2368
Ser8	2042	1652	7371	6307	6390	5125	5225	4832
Sf3b5	305	266	240	209	229	213	191	216
Sfxn1-3	1317	1348	1862	1334	2919	2265	1479	1652
Sin3A	1203	1747	2766	1514	2177	1497	2946	3420
Sirt2	428	498	520	401	620	450	339	407
Sirup	28	35	92	72	108	98	37	83
Six4	1	0	0	0	0	0	8	164
Sk1	700	1181	1739	1545	1035	846	2094	2294
Slik	2800	2698	6612	3754	4099	3491	7509	7780
Slob	54	36	238	111	171	77	101	137
Smr	551	608	1850	567	771	606	2118	2435
Snx6	1977	1966	3000	2684	2789	2242	4469	4851
Socs44A	783	890	2113	1448	1671	1425	1647	1971
Sod1	6667	8829	8846	9033	13530	10607	6619	7486
Sod3	1399	2080	1839	2043	5408	5164	2124	2268
Sos	409	405	733	560	648	478	819	960
Sox100B	231	180	594	597	191	199	768	929
Sox102F	25	15	30	29	158	183	57	86
Sox14	543	661	890	638	1074	780	1120	1411
Sox21a	212	194	492	675	251	240	981	1099
Spc105R	38	22	37	51	29	22	100	117
Spec2	164	132	339	325	369	371	246	246
Spn	1295	1722	2885	1673	1820	1939	2929	3472
Spn55B	2706	2858	7406	6953	3553	3761	6635	7175
Spn88Eb	25	6	22	43	136	82	28	26
Spred	442	446	745	671	730	707	1086	1229
Spt20	197	219	456	217	314	226	512	650
Sptr	505	509	583	526	110	144	571	622
Sra-1	1706	1788	2571	1966	2368	1908	3177	3415
Src42A	1865	1846	3040	2558	2994	2646	3440	3746
SsRbeta	3009	3570	3993	5354	4857	3988	2824	3152
Ssadh	1437	1586	3131	2694	3167	2697	3266	4498
Ssrp	1083	767	624	655	736	612	689	992
Strica	1086	1075	1982	1606	2441	2073	1669	1681
Strn-Mlck	147	158	365	204	329	193	314	443
Su(Tpl)	1984	2155	4084	2619	3288	2484	4257	4183
Su(z)12	348	367	580	473	524	356	688	879
Sugb	688	814	643	593	720	854	478	641
Swim	1129	1020	2948	2945	2710	2132	6618	8545
Synd	2895	3891	7034	5166	4137	4776	6979	7958
Syngr	16	20	30	24	111	102	13	16
Synj	305	373	576	510	587	467	619	799
Syp	4062	3977	6834	4960	4926	4806	10191	10340
Syt7	27	43	29	28	2269	1685	34	30
Taf1	871	912	1747	1081	1282	1123	1801	1958
Taf4	819	820	1398	1050	1091	964	1408	1825
Takl2	509	684	495	527	753	796	385	443
Tango9	1355	1450	1494	1241	1475	1263	1248	1423
Tao	1400	1445	2414	1696	1961	1621	2829	3343
Taz	1131	1056	1225	1019	990	831	1054	1071
Tehao	387	399	403	245	438	348	281	292
Ten-a	27	14	44	24	35	30	75	281
Ten-m	144	174	351	276	298	243	466	602
Tep2	508	321	729	510	349	327	1238	1658
Tep4	3631	2727	3185	1687	2455	1995	5712	4584
Tet	768	806	2718	1414	1125	964	4041	4374
Thd1	765	858	1244	936	535	625	1202	1506
Tim17a2	49	79	148	104	106	94	190	309
Tk	1078	1083	1336	951	2234	1637	786	887
Tlk	566	598	1269	692	776	678	1564	1771
Tm1	8703	10042	16135	14851	15065	13318	19433	19642
Tnks	364	484	673	422	711	464	934	954
Toll-9	594	600	684	509	794	706	516	450
Tollo	45	43	310	189	82	46	584	634
Tom7	989	1517	1435	956	1396	1515	855	756
Tomosyn	684	671	1226	853	1013	816	1517	1767
Top2	866	757	1283	1062	765	679	1783	2537
Tor	797	762	1672	908	1092	834	1774	2000
Torsin	751	1024	1068	1012	1958	1628	1057	1148
TotC	333	39	4	6	94	73	20	9
TotM	7	6	22	8	7516	2465	38	13
TpnC25D	499	571	326	429	661	454	371	377
TpnC47D	733	999	592	725	996	759	483	544
Trc8	587	708	1332	1084	1373	996	1277	1546
Treh	10658	10160	29028	21370	18209	13221	35162	40672
Trf2	880	948	1853	1119	1409	1346	2093	2265
TrpA1	393	353	909	545	1226	1046	305	323
Trpm	869	1207	2270	1456	1383	1612	2403	2956
Try29F	396	384	571	745	1239	666	1114	1658
Ts	44	32	61	110	47	30	139	205
Tsf1	117	76	134	47	1501	807	470	1397
Tsp3A	87	104	329	219	232	202	198	196
Tsp42Ed	8863	9058	15604	12873	12290	10464	16879	17211
Tsp42Ee	1661	1148	1724	2032	1509	1718	3444	4823
Tsp42Eg	1170	1762	994	803	566	559	523	692
Tsp42Ei	64	66	159	182	105	48	208	218
Tsp42El	398	304	633	568	545	458	828	970
Ttd14	3812	3592	3196	2420	5637	3626	2063	2367
TwdlT	8	5	31	3	65	31	15	96
TyrR	509	513	1439	1642	545	849	1325	1468
UQCR-6.4	596	1007	897	677	762	978	483	446
Uba1	4107	4055	6745	5230	5647	4983	7489	8814
Ubc7	1443	1709	1683	1431	1828	1710	1294	1425
Ubi-p5E	11503	16258	7035	5186	9954	9430	9647	9018
Ubr1	1057	1570	2525	1279	1713	1360	2908	3397
Ubr3	1061	1041	2079	1204	1439	1146	2455	2734
Uch	1021	1061	1391	1479	1544	1420	1829	2197
Ucp4A	700	780	1109	1009	1552	1305	816	1015
Ufd4	3182	3453	6347	3711	6344	5346	7080	7488
Ufm1	744	960	820	812	941	932	678	702
Ugt	1156	1115	2350	2274	1396	1313	2216	2315
Ugt37a1	131	186	522	544	208	171	918	1180
Ugt86Dc	1142	1725	1409	1813	3953	3386	2414	2366
Ugt86Dd	797	1737	2964	1639	2539	2961	3439	4430
Ugt86De	5	14	18	13	3681	4170	14	39
Ugt86Dg	145	241	215	164	724	548	145	92
Ugt86Dh	1383	1930	3061	1918	4889	4111	2469	2472
Ugt86Di	198	206	75	62	265	252	198	226
Ugt86Dj	894	1165	1487	1057	2504	2411	1601	1584
Uhg2	114	106	84	40	77	87	53	57
Uhg4	103	102	117	45	102	75	51	69
Unc-76	364	410	594	499	417	378	699	921
Unc-89	141	170	399	264	389	177	354	571
Unr	1901	1797	2940	2198	2294	2305	3553	4170
Usp10	782	737	1646	1092	1114	915	2025	2300
Usp15-31	531	589	996	691	706	871	1111	1289
Usp32	959	973	1747	1333	1440	1210	1882	2015
Usp5	720	773	1117	1099	1085	948	1380	1625
Uxs	331	375	631	581	497	490	752	857
Vang	250	219	353	261	314	254	450	588
Vha100-1	1139	1220	2306	1464	2656	2058	2175	2556
Vha100-2	10206	9479	14377	11497	19396	16373	10249	13473
Vha100-5	21745	18564	20260	18074	24002	22287	14206	12103
Vha13	15021	18436	17261	17776	28518	24451	12114	14105
Vha14-1	7200	8530	8221	7894	10705	10305	6339	6241
Vha16-1	104901	123983	119099	106533	144683	158095	91729	96005
Vha26	36250	42407	42787	38173	51853	52574	31382	34225
Vha36-1	12412	14932	15540	15505	21632	20980	10487	12381
VhaAC39-1	13602	16777	17753	16598	25824	24202	11170	12717
VhaM8.9	15144	17444	19492	19252	29732	24631	13740	17316
VhaM9.7-b	7933	9777	9561	9386	13087	12626	7072	7741
VhaPPA1-1	10497	11865	12836	11932	16951	14718	9735	10794
VhaSFD	13344	17104	18439	17666	21716	22115	12733	15854
Vinc	679	784	1608	1414	1188	1025	1885	2573
Vps11	651	553	551	481	622	732	502	460
Vps13B	517	615	1193	796	737	692	1161	1232
Vrp1	529	729	1508	1243	1005	904	1868	2241
WRNexo	63	32	87	131	40	36	140	192
Wnk	2005	2244	4653	2814	4069	3690	4939	4845
Wnt5	21	12	32	48	20	18	92	116
Wsck	113	71	296	235	175	139	255	337
X11L	595	613	961	713	891	781	1139	1330
YT521-B	471	622	874	730	740	567	1085	1354
Yp1	371	226	443	537	968	829	280	657
ZAP3	718	703	1517	958	1044	843	1347	1672
Zasp52	1160	1733	3236	2291	2036	1766	4735	5499
Zip42C.2	264	671	306	245	267	164	420	364
Zip89B	881	377	747	701	345	252	285	486
ZnT63C	3313	4094	3420	2494	4221	2884	2874	2366
ZnT77C	641	711	1088	724	477	539	472	490
Zw	421	349	856	674	1097	515	708	1274
a	66	43	303	250	27	38	549	649
ade3	234	222	490	382	591	383	584	1124
ago	749	837	1324	992	1175	908	1495	1724
agt	246	186	111	94	130	152	88	128
alpha-Est1	1513	1990	1028	721	2619	2278	1643	1563
alpha-Est10	638	725	621	432	619	416	644	674
alpha-Est4aPsi	11	45	105	141	44	226	104	175
alpha-Est5	4065	3757	5530	3633	2213	2019	4006	3836
alpha-Est7	1639	2453	8268	5029	3688	3437	2441	2860
alpha-Est8	1021	877	3264	2261	1300	1005	2441	1959
alpha-Man-Ia	426	284	605	571	490	336	912	1127
alpha-Spec	6776	8175	23601	13197	14025	10544	32154	37505
alphaTry	362649	485291	423563	365167	493810	363715	233487	277638
alphaTub67C	3	5	10	4	17	8	44	369
alphaTub84B	16198	18240	30626	36798	45673	31985	35313	43699
alphaTub84D	959	986	1433	1630	2194	1858	1351	1772
amon	266	320	345	238	461	337	213	200
antr	55	89	24	23	45	22	111	65
ap	9	5	3	16	40	51	11	23
app	1130	1265	2334	1442	1680	1531	2886	3012
aralar1	2393	1688	2809	2165	6012	4452	3088	3337
armi	165	108	252	233	164	136	264	677
aru	90	109	403	191	256	172	275	519
asp	21	9	27	39	24	12	94	213
aub	7	9	15	10	13	42	11	280
aurA	5	5	5	17	2	5	22	61
babo	1171	1153	1787	1437	1662	1647	2010	2439
babos	199	121	298	364	322	272	561	684
bark	2403	3314	8171	4387	5845	5568	9350	10025
baz	347	307	1914	915	626	635	1527	1634
bbg	6318	7147	17293	11237	10362	8366	19403	21627
bcd	0	0	0	0	2	3	2	39
bchs	265	425	1050	378	555	456	1160	1171
be	415	443	1120	667	1064	998	1014	1152
bel	2388	2878	4537	3494	4290	3371	4877	5453
beta-Spec	8301	8987	23096	13411	14256	10851	26595	30617
betaTry	214391	321529	247462	234384	423799	340136	118115	144519
betaTub56D	8888	10189	18904	20336	16066	14267	19619	25509
betaTub60D	1502	1201	2039	3797	2028	1617	6375	7696
bgm	4094	4812	4507	4775	6655	4842	3004	2100
bif	2861	3909	7498	4998	6563	5550	7130	8547
bip1	97	86	97	66	18	41	62	67
bmm	5255	5349	2836	2480	1978	2060	1385	1474
bnl	290	264	879	468	435	350	781	824
br	11	8	30	16	8	14	29	125
brat	308	276	408	302	263	239	615	908
brk	284	300	866	846	359	357	793	895
bru2	2078	2602	3177	2475	3268	3529	4507	4821
brv3	21	34	16	8	7	12	1	0
bt	1252	1575	3623	2395	2905	1591	3246	4248
btl	51	60	248	141	66	69	236	301
btsz	783	1194	2268	1634	1429	1390	1915	2592
bves	484	478	914	680	616	630	1025	1297
bwa	507	991	540	297	712	505	802	753
c(2)M	1	2	2	1	3	1	6	62
c11.1	1199	1127	2275	1657	1600	1356	2237	2677
ca	431	523	963	593	771	564	871	1164
caix	606	517	617	434	636	397	334	327
caps	1565	2200	3170	2484	2445	2091	4450	5197
capt	3103	3104	5631	5312	4884	3901	5689	6532
cert	1153	1416	2686	1784	2533	2479	2664	3063
chas	262	242	996	626	389	285	1322	1472
chb	991	1115	2311	1770	1751	1751	2737	2761
cher	1091	1211	5859	3354	1753	1886	5661	7302
chrb	644	644	1103	712	2648	1743	1270	1734
cib	6275	5676	10458	9162	7499	7612	14939	15951
cic	869	1061	2079	1147	1206	1017	2515	2601
cindr	2408	3377	6010	4304	4362	3639	8000	8614
ck	695	628	2570	1434	998	1135	2433	2434
cl	2799	3071	3770	3346	3513	3327	2277	2470
clos	25	13	20	14	31	18	76	1051
cmet	46	24	55	64	35	27	159	197
cni	1005	1107	1594	1294	2005	1859	1415	1361
cnk	329	403	710	447	640	570	712	887
cno	481	543	1761	978	727	623	2709	3129
cora	3300	3966	11190	6802	6220	5422	12543	15490
corto	239	371	581	473	366	439	621	898
cpa	3451	3449	5675	4958	4863	3792	6784	7100
cpo	278	269	685	506	431	396	1243	1375
crb	739	909	2295	1099	1233	987	2170	2487
crol	1477	1869	3011	2136	2439	1973	3291	3959
ct	48	136	125	217	110	535	439	947
ctrip	2030	2292	5194	2536	2676	2077	5577	6045
cu	844	1829	1302	938	2323	1777	673	738
cuff	16	29	103	119	163	131	77	73
cv-2	397	265	566	437	220	171	1471	1636
cv-c	906	1064	2488	1349	1162	1032	3560	3651
cype	3175	4148	3965	3353	4409	4307	2569	2764
dally	2107	1858	2779	2650	1709	1290	3529	3211
daw	510	1719	598	667	265	317	328	196
dco	980	1144	1854	1326	1531	1352	1959	2294
dhd	4	2	8	8	22	56	115	1001
didum	2231	2718	5177	3031	3795	3360	5176	5744
dikar	424	405	1074	455	586	519	1087	1399
dl	838	976	1672	1135	736	694	1469	1594
dlg1	628	628	1294	909	1107	852	1413	1675
dlp	408	483	952	790	655	511	1296	1485
dlt	100	122	289	196	184	181	377	399
dmGlut	20954	21054	14044	15762	16381	13782	8538	5811
dock	363	390	1011	554	477	414	1048	1170
dom	2114	2684	4973	2466	3171	2458	4610	5566
dome	814	784	1422	1515	1428	782	1885	2181
dop	593	610	1276	760	899	781	1462	2147
dos	300	340	695	517	615	511	594	838
dpa	161	127	208	236	179	111	325	462
dpy	37	23	314	53	108	56	128	454
drpr	1638	2864	4014	3037	3112	2517	5507	8040
dsd	1485	1687	3752	2521	2589	2208	4732	5098
dtn	223	194	482	256	270	227	551	600
e(y)3	433	435	922	543	616	457	1019	1547
eIF2Bgamma	590	552	589	521	706	626	446	570
eIF4G2	696	818	2416	1123	1105	911	2214	2912
eIF6	848	795	754	636	1147	815	520	652
east	695	625	1418	803	907	761	1675	1973
ed	131	155	297	227	319	259	302	612
edl	129	150	212	195	179	128	349	412
egl	1430	1809	2828	2079	2397	2154	3007	3391
ena	292	265	652	438	476	414	1280	1345
enc	388	372	814	492	558	425	861	1329
ens	2991	3598	6670	4185	4792	4133	7906	8948
epsilonTry	92331	168525	75257	61013	156930	120993	28724	28371
esc	37	21	62	44	58	27	89	127
etaTry	3461	3808	3732	3852	2074	2276	4011	3689
ex	598	889	1713	1285	531	510	2170	2171
exp	34	18	2	1	0	0	0	9
faf	3192	3559	7296	3447	3945	3393	8848	9656
fax	299	397	655	554	528	563	1261	1491
fbp	429	480	838	637	1971	1841	401	886
feo	33	13	32	61	21	23	82	173
firl	21	32	32	15	489	176	10	5
fkh	852	1119	2579	1999	2161	2013	2825	3770
fliI	907	1030	1906	1407	1612	1249	2239	2394
fng	55	51	228	177	91	56	225	267
fog	357	387	496	447	377	360	913	1061
fra	1083	1450	2358	1886	1683	1019	3139	2720
frac	3	0	14	5	111	23	2	11
frm	51	30	74	10	7	4	17	117
fry	1471	1428	5077	2211	2071	1568	5434	5970
fs(1)M3	13	6	8	4	6	5	52	715
fs(1)N	1	1	1	0	3	1	50	620
fs(1)Ya	6	11	3	5	4	13	23	172
fs(1)h	926	1055	2273	1133	1287	1065	3066	3367
fu12	984	856	1743	1048	1458	941	2130	1944
fus	548	497	1163	832	823	588	1311	1667
fuss	10	13	18	15	88	125	20	48
fz2	767	1066	1657	1263	1168	830	2347	2750
galla-1	529	579	736	654	1359	1196	655	625
gammaTry	191	274	219	219	142	93	162	207
gammaTub37C	2	4	3	6	8	7	13	69
garz	1185	1407	2962	2532	2155	1648	2872	2943
gas	1359	1548	2405	2154	2961	2432	2827	2809
gpp	473	550	1313	648	775	600	1621	1873
gukh	360	387	752	511	462	316	705	851
gwl	13	7	17	13	16	20	67	330
hang	477	484	997	530	633	528	1306	1492
hdc	314	293	846	499	525	465	1180	1338
hep	544	661	1153	848	1244	879	1416	1552
hh	299	246	306	429	342	271	646	683
hid	203	331	547	351	567	627	602	775
hiw	1929	3487	6668	4156	4090	3016	6999	8339
hng3	33	46	43	26	3	12	22	61
hpRNA:CR32207	107	118	0	0	0	1	42	56
hpRNA:CR33940	97	93	22	14	27	25	53	69
htk	626	574	1288	810	1038	743	1437	1849
hts	3469	3731	5928	4841	5177	4671	8278	8636
htt	540	622	1272	681	646	562	1784	2142
hyd	2312	2423	4713	2863	3443	3175	4838	5484
iPLA2-VIA	977	786	1631	1250	1287	1260	2021	2380
iav	33	48	80	62	51	37	133	147
insc	260	230	656	620	311	190	1004	1133
jar	5376	6284	11146	8109	8670	8126	12158	13081
jim	847	1232	1957	1237	1317	1344	2112	2482
jing	227	321	469	297	305	240	536	700
jp	224	246	395	435	410	312	664	762
jub	241	242	398	286	310	232	485	643
kay	2882	2439	6230	5650	4936	4131	5769	6538
kcc	4361	4931	8670	7722	9691	8817	8617	8427
kdn	10413	13408	15856	16854	28437	24618	10114	11364
kek5	319	384	913	607	538	480	837	832
kel	220	230	399	305	415	393	423	635
kibra	279	315	1159	751	471	447	1772	1869
kis	1562	1557	5047	2137	2246	1954	5656	6380
kon	55	88	130	123	195	131	284	299
kraken	1790	2499	2305	1820	2364	2036	1310	1524
krimp	6	5	8	4	12	13	22	86
kst	14294	14299	58338	23091	19091	18354	85973	80198
kto	434	341	889	443	578	398	1082	1288
kug	1546	1316	3877	2211	2995	2522	4349	4375
kuk	87	70	121	137	91	76	200	366
kuz	382	337	895	672	466	665	1180	1612
l(1)G0196	1557	1951	3815	2906	2461	2833	4898	5879
l(1)G0320	4571	5683	6042	7230	6778	5140	4502	4553
l(2)03659	78	67	36	27	338	271	41	43
l(2)09851	693	799	781	644	1061	703	608	717
l(2)efl	915	1369	1158	1716	1386	1116	558	977
l(2)k05819	1004	1261	1811	1448	1771	1386	2386	2492
l(2)k09848	582	480	512	357	506	395	350	477
l(3)02640	764	724	891	553	762	560	612	703
l(3)neo38	704	757	1235	981	1069	859	1406	1738
l(3)neo43	151	197	152	162	165	173	115	140
larp	2503	3125	5252	3206	4281	3687	6210	7067
lcs	6526	144	14	10	2353	3076	1155	5267
lectin-24A	355	865	3	0	0	0	59	93
lectin-28C	328	401	502	386	975	924	701	922
lectin-37Db	6234	8351	10598	10333	8528	6291	15058	15365
lid	1110	1214	2045	1361	1630	1327	2215	2464
lig	1863	2029	3882	2629	2961	2219	4764	5944
lig3	735	596	558	473	703	710	535	569
lili	501	502	540	458	500	522	326	342
lilli	667	576	1314	800	807	685	1562	1640
lola	3229	3232	5027	4089	4809	4216	5413	6896
luna	137	162	203	160	129	151	357	403
lva	1601	1444	4204	2444	2455	1905	3753	4258
mRpL39	526	585	463	470	328	360	538	639
mRpL42	352	409	404	385	534	485	252	312
mRpL54	146	173	368	389	367	372	159	184
mael	19	8	19	20	18	7	42	131
maf-S	952	1209	1183	963	1541	1414	672	738
mahe	597	952	1326	963	1041	877	2223	2623
mam	103	104	259	141	213	208	211	410
mamo	587	636	1129	665	623	539	2096	2307
mask	1339	1427	4517	1837	2296	1758	5424	5785
mbf1	2350	2122	2460	2400	3258	3019	1633	1852
mbl	543	540	1007	618	668	566	1560	1682
mdy	157	190	543	354	230	217	615	625
mei-41	71	45	102	74	52	47	158	194
mei-P26	621	605	1162	734	791	791	1311	1723
mesh	24793	26731	57848	39963	39837	32017	72320	77998
mew	1311	1182	3144	2441	1292	1219	5691	5861
mgl	107	71	465	154	197	126	483	1130
mia	435	488	422	310	485	436	275	230
mim	302	408	893	477	561	409	897	1198
mld	121	118	179	145	185	120	216	543
mnb	505	629	849	671	772	655	1066	1320
mnd	84	146	161	290	190	593	266	435
mon2	1598	1816	3272	2472	2520	2037	3696	3710
mop	1772	1765	3117	1872	2435	1907	3597	4064
mre11	357	279	563	437	725	664	253	321
msi	74	68	180	113	77	78	239	327
msn	2198	2722	4770	2897	3092	2819	6396	7259
msps	1040	1094	2101	1266	1368	1367	2278	3063
mth	354	415	448	378	845	769	553	602
mthl14	2159	2265	4507	4063	3567	3918	5979	5755
mthl8	396	265	544	399	568	521	183	216
mtrm	4	1	5	3	2	10	24	150
mtt	49	35	162	96	103	79	189	174
mud	29	26	56	68	39	24	129	479
mura	797	1085	1515	1024	1658	1355	2206	2451
mv	569	905	1821	799	983	857	2419	2710
mwh	1217	1489	965	966	6693	5182	739	239
mys	5123	5199	11208	8208	6903	6433	15454	16677
nclb	1018	915	1172	817	1321	832	677	903
nec	101	47	84	74	656	554	43	130
nej	418	443	1780	515	634	564	2049	2246
net	131	295	143	95	91	106	153	129
nocte	590	537	1769	786	842	587	2462	2958
nonC	589	693	1498	824	1264	989	1750	1921
nos	1	1	0	0	4	3	10	96
nrv3	324	456	560	248	2332	2141	271	490
obst-F	6	2	5	4	719	106	3	8
obst-H	73	14	61	25	3	3	112	237
odd	1496	1938	1498	965	1525	1401	779	787
ome	8209	9934	11380	10264	12424	12105	7536	6194
orb	7	15	10	17	21	41	113	1473
orb2	199	228	391	252	376	377	502	571
osa	587	630	1622	867	965	691	1702	2147
osk	2	6	1	3	10	17	247	2954
ovo	11	28	37	12	30	15	40	418
ox	808	1039	943	702	653	862	530	476
p130CAS	1938	2057	5308	3953	3200	3232	5023	5744
p53	453	350	253	164	227	182	187	195
pain	395	369	1006	810	440	298	1444	1736
pan	1635	1803	2768	1626	916	976	2760	2512
par-1	6041	6554	11347	7325	8017	7535	11442	12872
pav	43	22	54	64	41	35	116	179
pbl	150	159	260	258	253	231	359	569
pcx	397	363	1011	476	536	400	1538	1724
pdgy	753	1703	2707	2170	1117	1684	4129	4696
pdm2	297	274	501	702	408	332	1120	1213
peb	1667	2485	4353	2491	2674	1876	5281	5747
per	122	240	387	255	249	160	471	645
pgant3	686	622	1139	1157	623	520	2849	3047
pgant4	1006	561	3273	1582	6296	1327	194	513
pgant6	2333	2433	3397	3333	3564	2969	4508	4666
pgc	0	0	2	0	4	5	11	75
phr	82	46	226	164	268	193	62	104
phr6-4	18	13	1	4	1	0	33	64
pico	139	131	340	210	265	191	328	646
pins	649	654	1117	918	811	606	1487	1642
pirk	1371	2127	927	931	749	434	3758	910
piwi	16	8	17	36	21	38	46	489
pk	21	33	33	30	127	88	11	24
ple	158	162	699	319	807	189	15	101
plum	79	66	127	93	66	46	170	425
pnt	571	666	1256	1145	1236	1111	1675	1916
pnut	1093	1102	2139	2014	1555	1424	3012	3665
pod1	956	1051	3719	1956	1790	1713	4843	5365
poe	2388	2450	7821	3140	3655	3255	7961	8128
polo	88	35	89	148	79	75	225	457
ppk18	21	28	21	18	38	31	7	3
ppk6	25	10	5	6	9	5	1	3
pps	657	608	1461	851	910	777	1278	1630
prage	285	298	466	255	253	276	507	808
prominin-like	822	1021	2239	1568	1643	2450	2562	2589
psq	487	481	915	532	742	527	945	1431
pst	34156	38446	65262	57668	83511	74923	46565	38344
puc	1560	2204	3902	2894	2374	2266	3961	4379
puf	559	500	1504	688	832	579	1665	1879
pum	268	301	737	454	760	605	764	1195
pyd	753	846	2313	1320	744	582	4070	4570
pyr	266	468	1001	584	651	410	1469	1780
r	321	325	700	442	579	339	1060	2180
ranshi	202	127	147	144	210	174	100	93
raptor	280	298	626	371	480	342	687	895
raw	1310	2353	6359	4020	2899	3168	4871	5979
rb	390	430	729	559	630	558	757	962
rdgA	113	148	268	173	182	265	250	431
rdgB	163	235	327	287	308	367	394	698
rempA	63	17	33	167	143	65	417	406
rev7	209	239	98	109	134	121	77	91
rgn	941	924	1560	1762	1910	2124	2097	2808
rgr	175	150	234	187	345	248	387	389
rhea	2402	2371	7622	4197	3718	3016	12068	12481
rho	92	34	52	63	67	37	235	243
rho-4	1640	1780	2610	2388	2105	1774	3427	3601
rictor	523	631	941	627	859	665	1188	1543
rin	3149	3130	4638	3850	3883	3362	6001	7539
ringer	1149	1887	4023	2630	2373	2866	2879	4281
rno	455	474	1141	502	531	496	1167	1227
robo2	60	68	224	151	104	91	347	388
rod	78	60	92	93	69	58	156	241
rogdi	1565	1773	1650	1340	1450	1265	1426	1186
[truncated: 118 more rows]
